# Supplementary material for: Allylic alcohol synthesis by Ni-catalyzed direct and selective coupling of alkynes and methanol
Source: Royal Society of Chemistry journal article supplement (doi:10.1039/d1sc02625a), 2021-01-01
Supplement: d1sc02625a1.pdf [file d1sc02625a1.pdf]

## Table of Contents

|                                                                                     |      |
|-------------------------------------------------------------------------------------|------|
| 1. General information                                                              | S2   |
| 2. General procedure                                                                | S3   |
| 3. Additional experiments                                                           | S4   |
| 4. Characterization data of products                                                | S12  |
| 5. Crystallographic data for compound <b>7a</b>                                     | S43  |
| 6. Copies of the $^1\text{H}$ , $^{19}\text{F}$ NMR and $^{13}\text{C}$ NMR spectra | S54  |
| 7. References                                                                       | S116 |

## 1. General information

$^1\text{H}$  and  $^{13}\text{C}$  NMR data were recorded with Bruker ADVANCE III (400 MHz) or JNM-ECZ400S/L1 (400 MHz) spectrometers. Chemical shifts are given in ppm. The spectra are calibrated to the residual  $^1\text{H}$  and  $^{13}\text{C}$  signals of the solvents. Multiplicities are abbreviated as follows: singlet (s), doublet (d), triplet (t), quartet (q), doublet-doublet (dd), quintet (quint), septet (sept), multiplet (m), and broad (b).  $^{19}\text{F}$  NMR spectra were recorded using  $\text{CFCl}_3$  as internal standard. Gas chromatography were determined with a SHIMADZU Nexis GC 2030 gas chromatography instrument with a FID detector. High-resolution mass spectra (HRMS) were recorded on Thermo Fisher Orbitrap Elite mass spectrometer. The photoreaction instrument (WPTEC-1020L) was purchased from WATTCAS, China.

Unless otherwise stated, starting materials were purchased from commercial suppliers (Energy Chemical, Alfa, Aldrich and so on). All reactions dealing with air- or moisture-sensitive compounds were performed in the argon-filled glove box or by standard Schlenk techniques in oven-dried reaction vessels under argon atmosphere. Solvents were purchased in HPLC quality, degassed by purging thoroughly with argon and dried over activated molecular sieves of appropriate size. More sensitive compounds were stored in a desiccator or in a glove-box if required. Reactions were monitored by thin layer chromatography (TLC) using glass 0.25 mm silica gel plates. Compounds were visualized by UV-light at 254 nm and by dipping the plates in an aqueous potassium permanganate solution followed by heating. Flash column chromatography was performed over silica gel (200-400 mesh).

## 2. General procedures

### 2.1

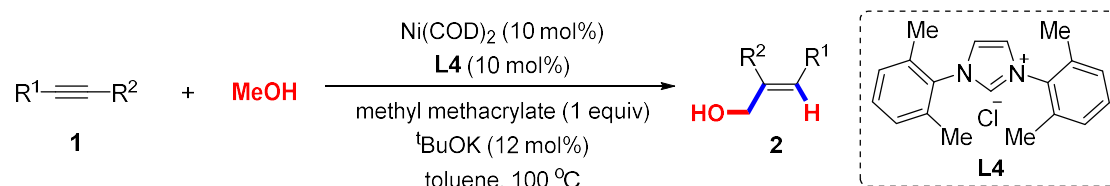

A mixture of  $Ni(COD)_2$  (10 mol%), **L4** (10 mol%), methyl methacrylate (0.2 mmol),  $tBuOK$  (12 mol%), dry toluene (1 mL) and methanol (3 mL) were stirred in a sealed tube at room temperature for 30 min under argon. To the resulting solution was added alkyne substrate **1** (0.2 mmol), the reaction mixture was heated at 100 °C until the reaction was complete (monitored by TLC). The solvent was then removed under vacuum and the residue was purified by chromatography on silica gel, eluting with ethyl acetate/petroleum ether 1:20~1:6 (v/v) to afford the allylic alcohol **2**.

### 2.2

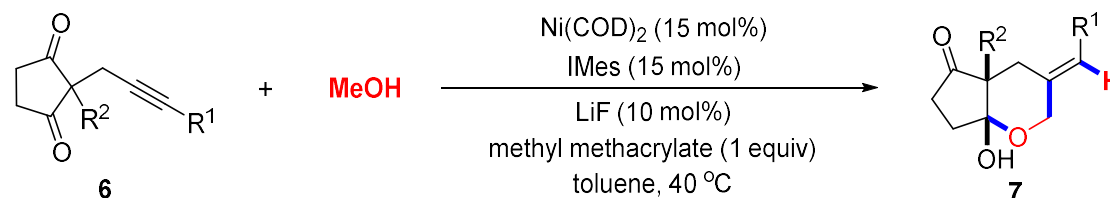

A mixture of  $Ni(COD)_2$  (15 mol%), IMes (15 mol%), methyl methacrylate (0.2 mmol), LiF (10 mol%), dry toluene (1.5 mL) and methanol (0.5 mL) was stirred in a sealed tube at room temperature for 30 min under argon. To the resulting solution was added alkyne substrate **6** (0.2 mmol), the reaction mixture was heated at 40 °C until the reaction was complete (monitored by TLC). The solvent was then removed under vacuum and the residue was purified by chromatography on silica gel, eluting with ethyl acetate/petroleum ether 1:8~1:2 (v/v) to afford the allylic alcohol **7**.

### 3. Additional Experiments

#### 3.1 Side Reactions

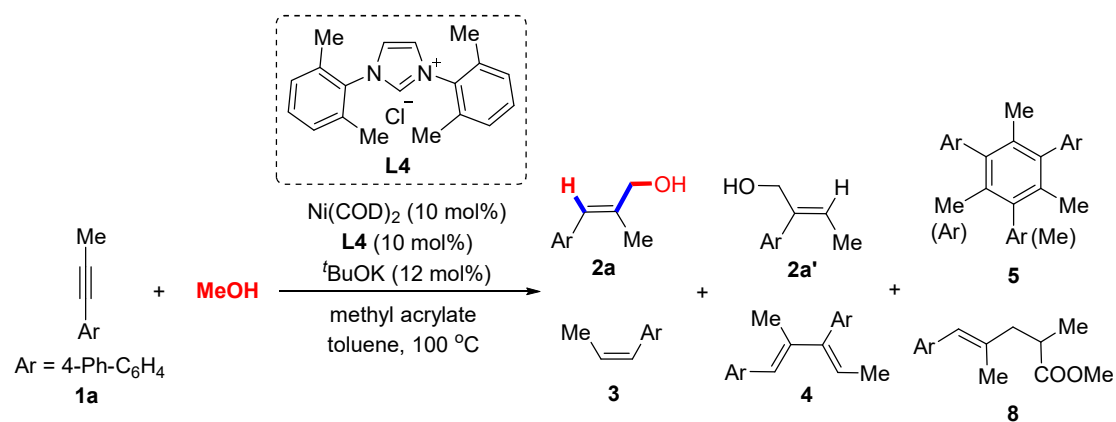

| entry | ligand    | additive   | yield <sup>b</sup><br>( <b>2</b> , %) | yield <sup>b</sup><br>( <b>3</b> , %) | yield <sup>b</sup><br>( <b>4</b> , %) | yield <sup>b</sup><br>( <b>5</b> , %) | yield <sup>b</sup><br>( <b>8</b> , %) |
|-------|-----------|------------|---------------------------------------|---------------------------------------|---------------------------------------|---------------------------------------|---------------------------------------|
| 1     | <b>L4</b> | 0          | 40 (14/1)                             | 9                                     | 22                                    | 23                                    | 0                                     |
| 2     | <b>L4</b> | 0.2 equiv  | 54 <sup>c</sup> (14/1)                | 8                                     | 6                                     | 7                                     | 13%                                   |
| 3     | <b>L4</b> | 1.0 equiv. | 60 <sup>c</sup> (14/1)                | 6                                     | < 2                                   | < 2                                   | 18%                                   |

<sup>a</sup>Reactions conditions: **1a** (0.2 mmol), Ni(COD)<sub>2</sub> (10 mol%), ligand (20 mol%), <sup>t</sup>BuOK (12 mol%), additive (1 equiv) in toluene (1 mL) and MeOH (3 mL) in sealed tube at 100 °C.

<sup>b</sup>Determined by GC analysis using adamantane as the internal standard. <sup>c</sup>Isolated yield.

#### (*Z*)-4-(prop-1-en-1-yl)-1,1'-biphenyl (**3**)

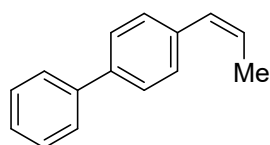

Chemical Formula: C<sub>15</sub>H<sub>14</sub>

Exact Mass: 194.1096

<sup>1</sup>H NMR (400 MHz, CDCl<sub>3</sub>) δ 7.63 - 7.56 (m, 4H), 7.46 - 7.32 (m, 5H), 6.52 - 6.42 (m, 1H), 5.90 - 5.79 (m, 1H), 1.96 (dd, *J* = 7.19, 1.83 Hz, 3H);

<sup>13</sup>C NMR (151 MHz, CDCl<sub>3</sub>) δ 140.9, 139.1, 136.7, 129.4, 129.2, 128.8, 127.2, 127.03, 126.98, 126.8, 14.8.

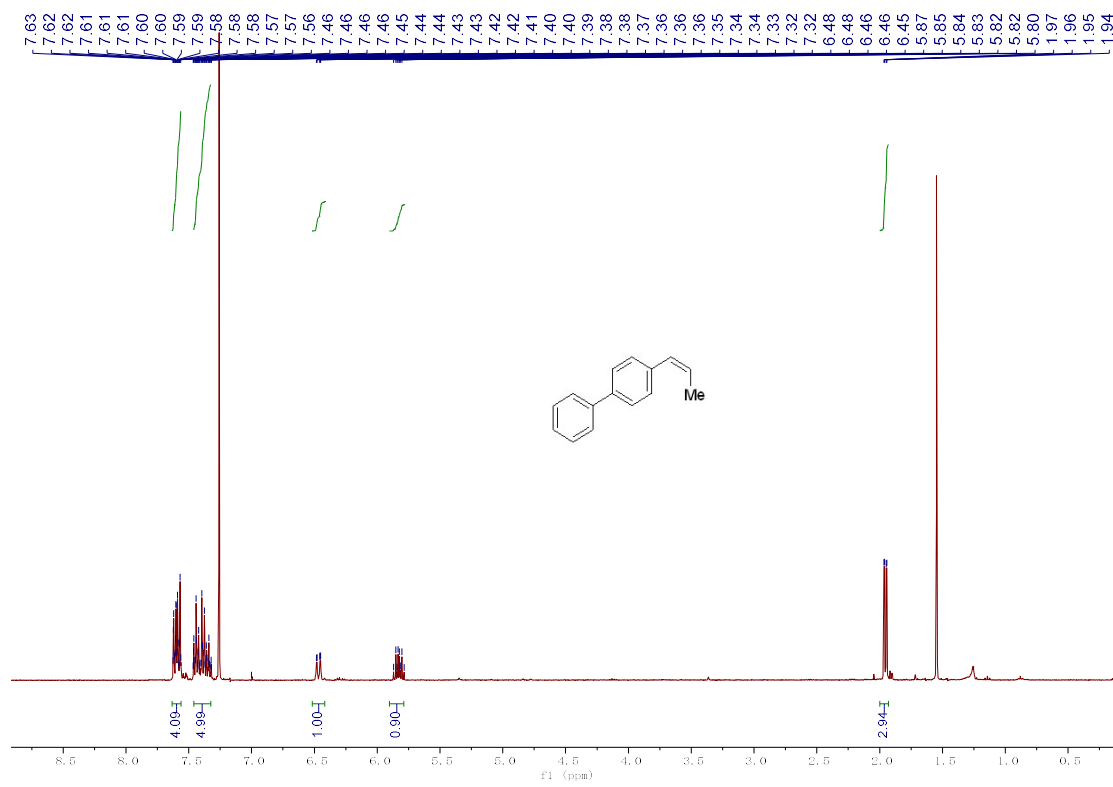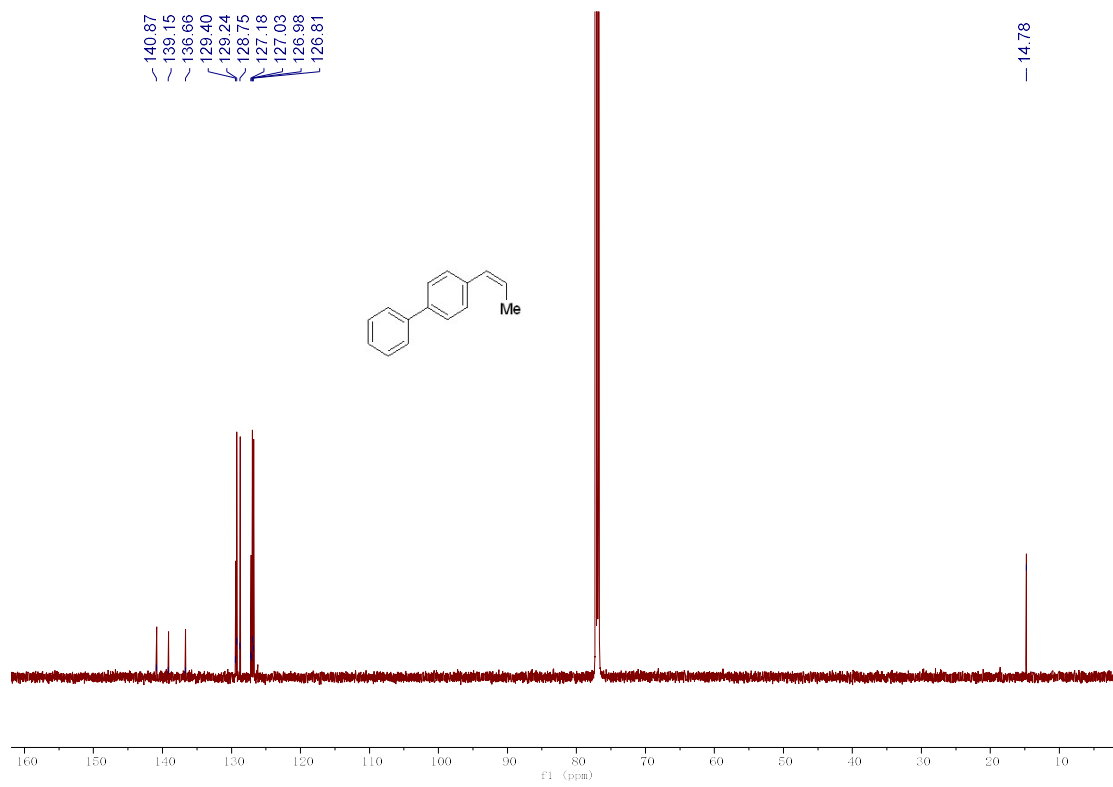

**4,4''-(2,3-dimethylbuta-1,3-diene-1,4-diyl)di-1,1'-biphenyl (4)**

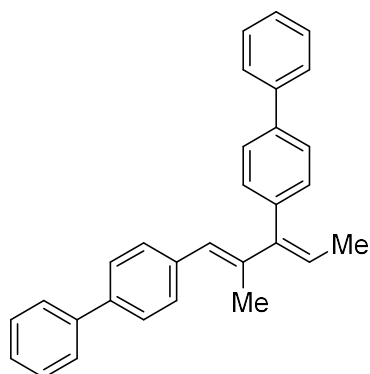

$^1\text{H}$  NMR (400 MHz,  $\text{CDCl}_3$ )  $\delta$  7.68 - 7.66 (m, 1H), 7.66 - 7.64 (m, 2H), 7.63 - 7.58 (m, 4H), 7.55 - 7.51 (m, 3H), 7.45 - 7.40 (m, 4H), 7.36 - 7.29 (m, 4H), 6.21 (s, 1H), 6.07 (q,  $J = 7.01$  Hz, 1H), 2.15 (d,  $J = 1.21$  Hz, 3H), 1.67 (d,  $J = 7.01$  Hz, 3H);

$^{13}\text{C}$  NMR (151 MHz,  $\text{CDCl}_3$ )  $\delta$  145.3, 140.8, 139.3, 139.0, 138.8, 130.4, 129.7, 129.0, 128.8, 128.7, 127.2, 127.1, 127.0, 126.9, 126.8, 126.6, 123.6, 16.0, 15.7.

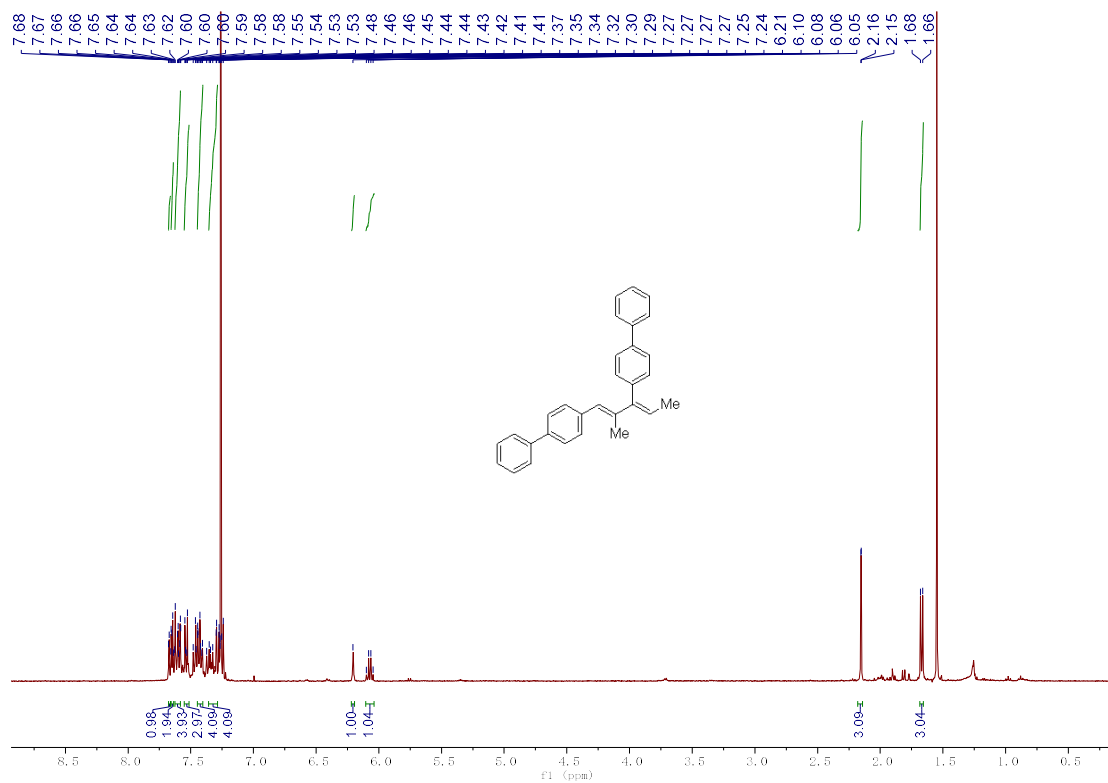

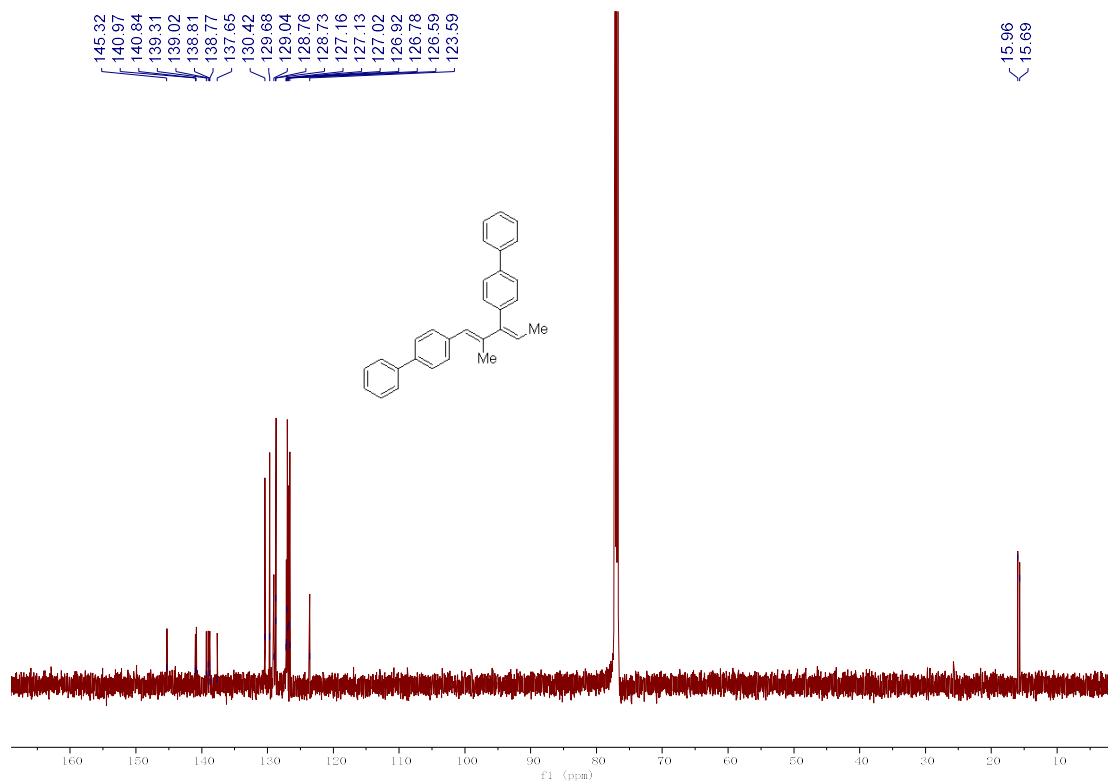

**methyl (*E*)-5-([1,1'-biphenyl]-4-yl)-2,4-dimethylpent-4-enoate (8)**

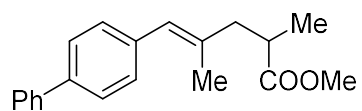

Chemical Formula: C<sub>20</sub>H<sub>22</sub>O<sub>2</sub>  
 Exact Mass: 294.1620

<sup>1</sup>H NMR (400 MHz, CDCl<sub>3</sub>) δ 7.64 - 7.54 (m, 5H), 7.43 (m, 2H), 7.34 - 7.30 (m, 2H), 6.32 (s, 1H), 3.69 (s, 3H), 2.81 - 2.73 (m, 1H), 2.62 - 2.55 (m, 1H), 2.30 - 2.23 (m, 1H), 1.91 (d, *J* = 1.4 Hz, 3H), 1.57 (s, 2H), 1.20 (d, *J* = 7.0 Hz, 3H);

<sup>13</sup>C NMR (151 MHz, CDCl<sub>3</sub>) δ 176.9, 140.8, 138.8, 137.1, 136.2, 129.2, 128.7, 127.1, 126.9, 126.8, 126.7, 51.6, 45.1, 38.1, 17.7, 16.7.

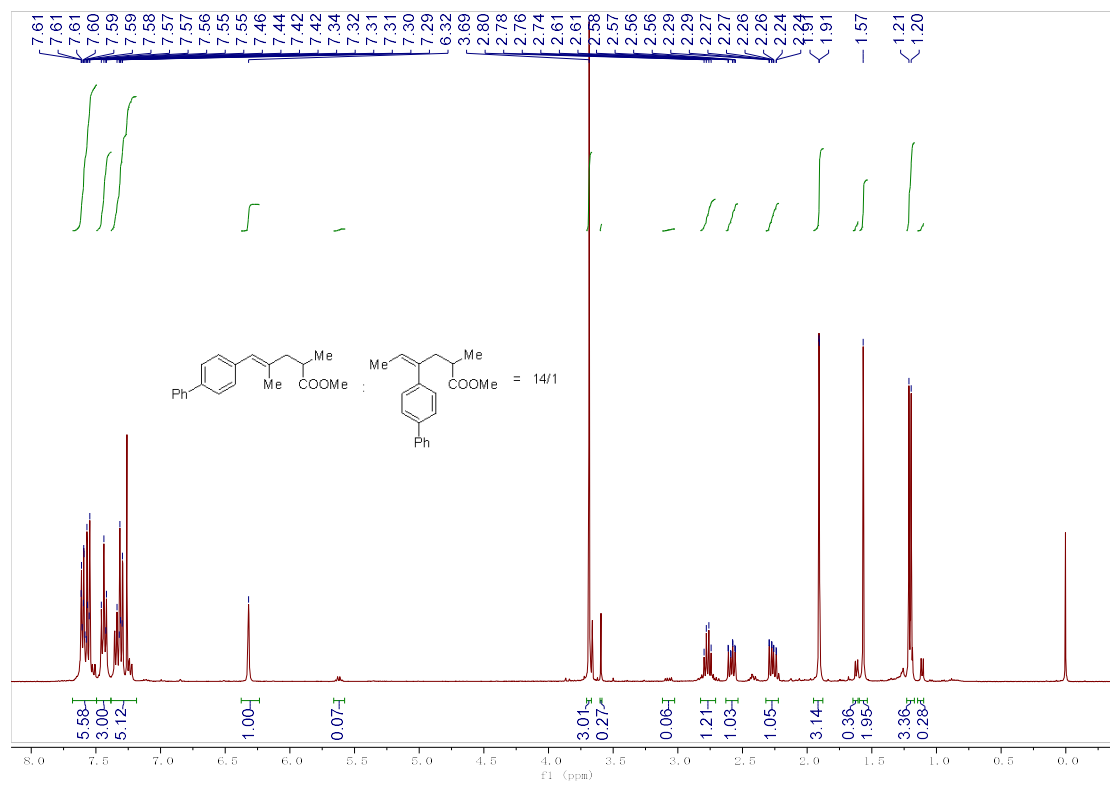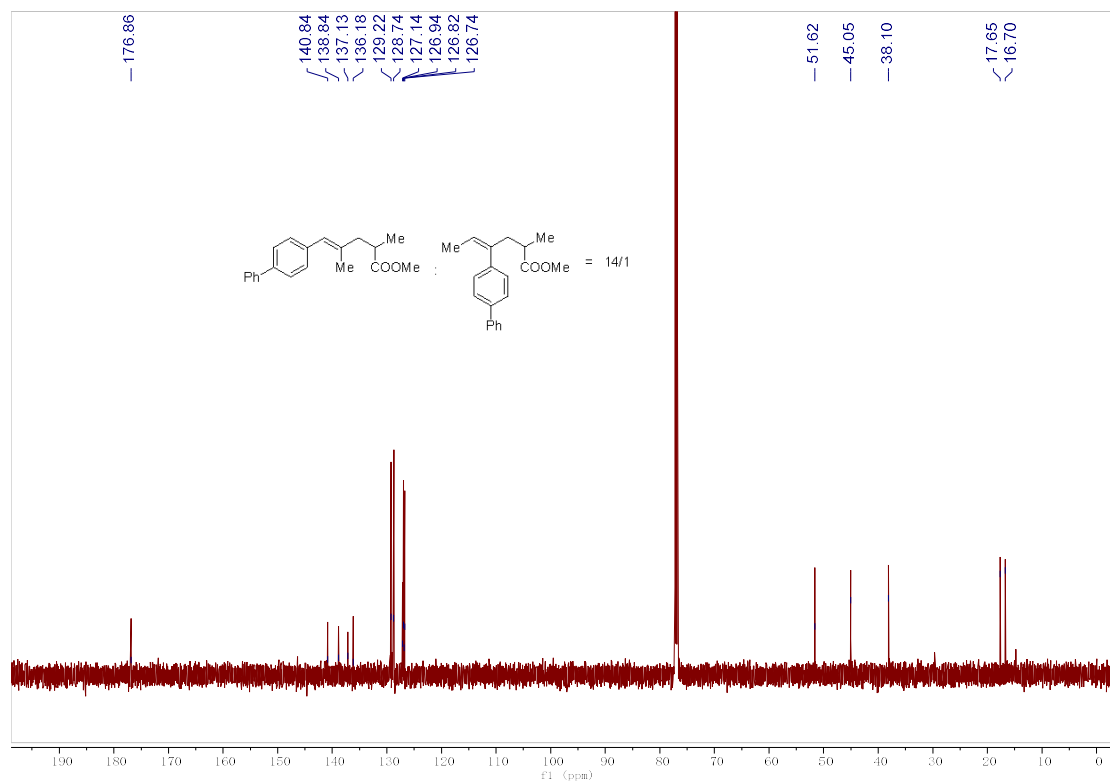



### 3.2 Mechanistic study

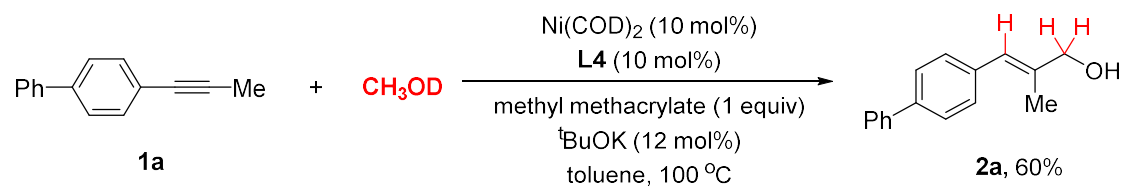

**Experimental procedure:** A mixture of  $\text{Ni(COD)}_2$  (10 mol%, 5.4 mg), **L4** (10 mol%, 6.2 mg), methyl methacrylate (0.2 mmol, 20 mg),  $\text{tBuOK}$  (12 mol%, 2.7 mg), dry toluene (1 mL) and  $\text{CH}_3\text{OD}$  (3 mL) were stirred in a sealed tube at room temperature for 30 min under argon. To the resulting solution was added alkyne substrate **1a** (0.2 mmol, 38.4 mg), the reaction mixture was heated at 100  $^\circ\text{C}$  until the reaction was complete (monitored by TLC). The solvent was then removed under vacuum and the residue was purified by chromatography on silica gel, eluting with ethyl acetate/petroleum ether 1:20~1:8 (v/v) to afford the allylic alcohol **2a** (27 mg, 60% yield) with 0% deuterium incorporation.

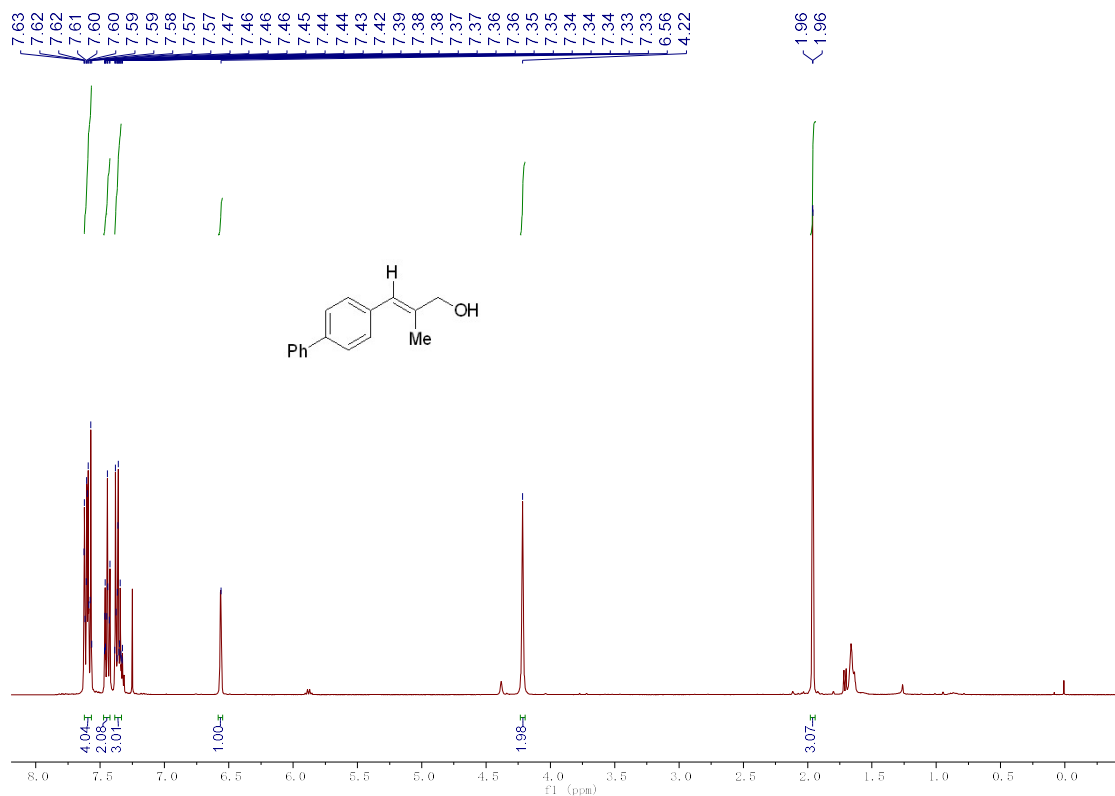

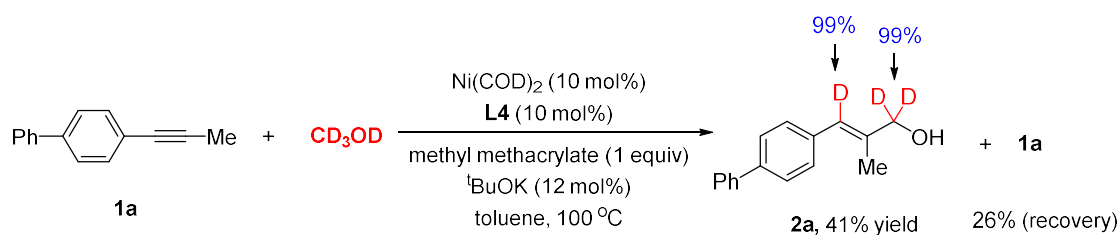

**Experimental procedure:** A mixture of  $\text{Ni}(\text{COD})_2$  (10 mol%, 5.4 mg), **L4** (10 mol%, 6.2 mg), methyl methacrylate (0.2 mmol, 20 mg),  $t\text{BuOK}$  (12 mol%, 2.7 mg), dry toluene (1 mL) and  $\text{CD}_3\text{OD}$  (3 mL) were stirred in a sealed tube at room temperature for 30 min under argon. To the resulting solution was added alkyne substrate **1a** (0.2 mmol, 38.4 mg), the reaction mixture was heated at 100 °C until the reaction was complete (monitored by TLC). The solvent was then removed under vacuum and the residue was purified by chromatography on silica gel, eluting with ethyl acetate/petroleum ether 1:20~1:8 (v/v) to afford the allylic alcohol **2a-D** (18.4 mg, 41% yield) with 99% deuterium incorporation.

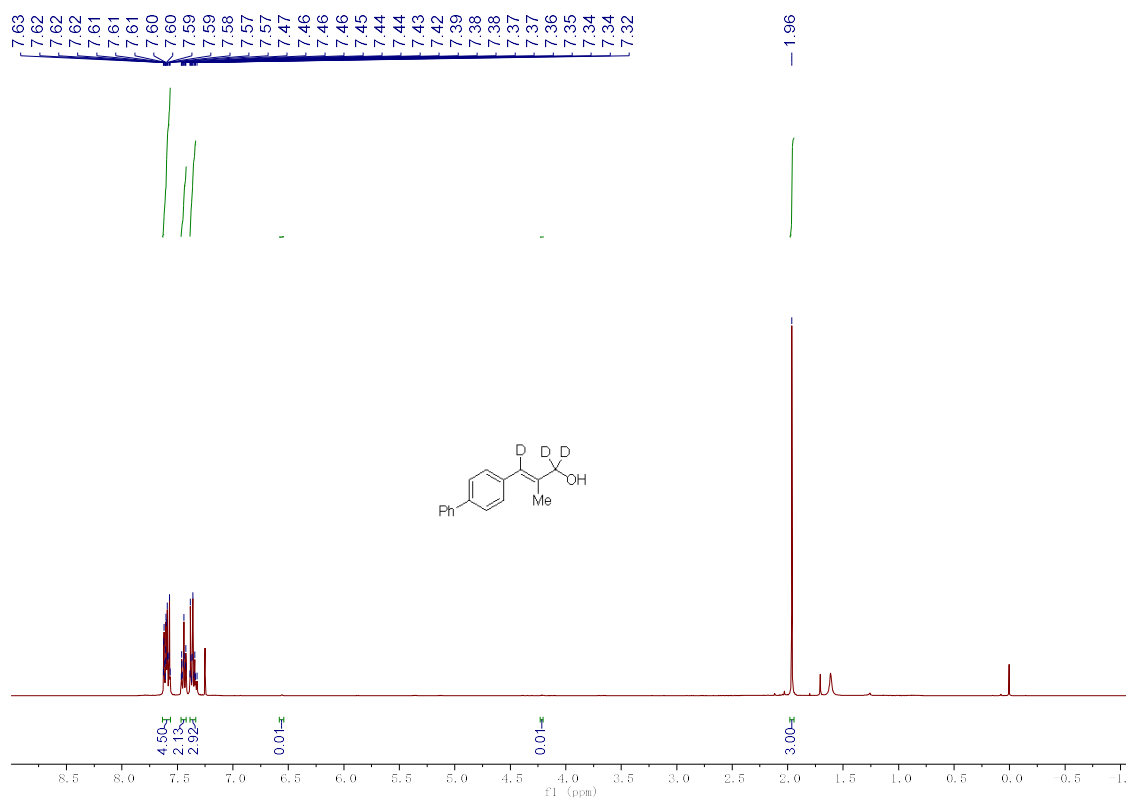

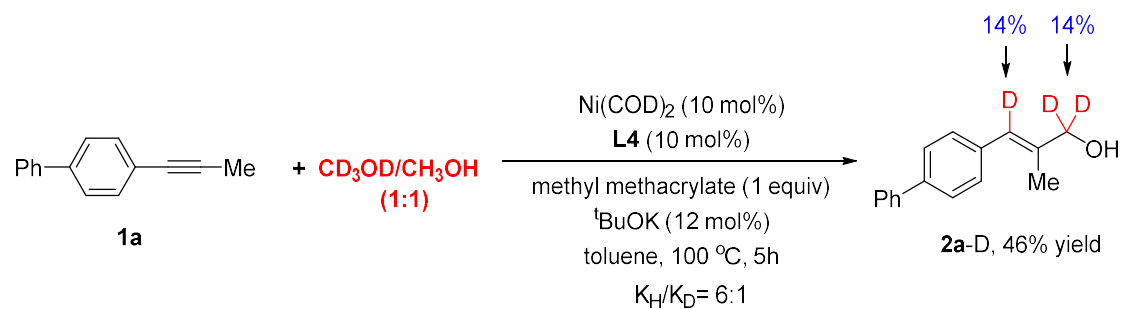

**Experimental procedure:** A mixture of  $\text{Ni(COD)}_2$  (10 mol%, 5.4 mg), **L4** (10 mol%, 6.2 mg), methyl methacrylate (0.2 mmol, 20 mg),  $\text{'BuOK}$  (12 mol%, 2.7 mg), dry toluene (1 mL),  $\text{CD}_3\text{OD}$  (1.5 mL) and  $\text{CH}_3\text{OH}$  (1.5 mL) were stirred in a sealed tube at room temperature for 30 min under argon. To the resulting solution was added alkyne substrate **1a** (0.2 mmol, 38.4 mg), the reaction mixture was heated at  $100^\circ\text{C}$  for 5 hours (monitored by TLC). The solvent was then removed under vacuum and the residue was purified by chromatography on silica gel, eluting with ethyl acetate/petroleum ether 1:20~1:8 (v/v) to afford the allylic alcohol **2a-D** (20.6 mg, 46% yield) with 14% deuterium incorporation.

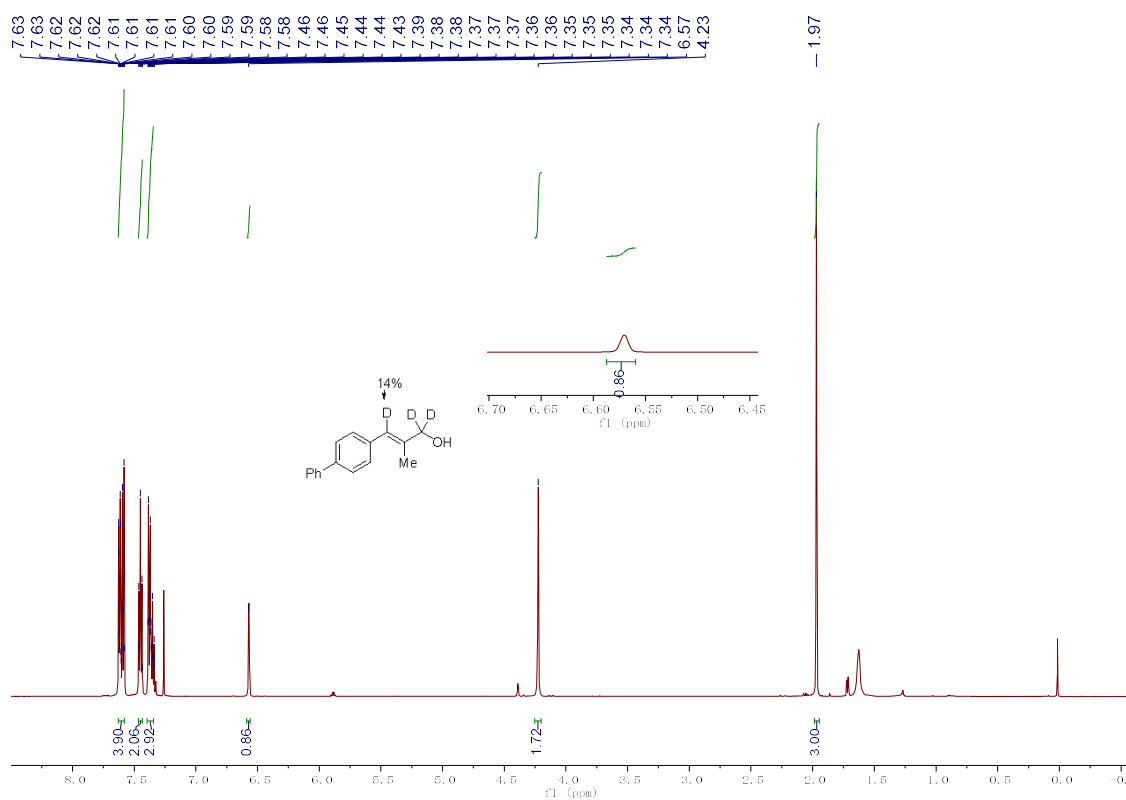

#### 4. Characterization data of products

##### (*E*)-3-([1,1'-biphenyl]-4-yl)-2-methylprop-2-en-1-ol (**2a**)

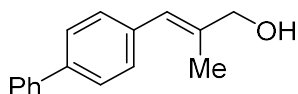

Chemical Formula: C<sub>16</sub>H<sub>16</sub>O

Exact Mass: 224.1201

**2a** was prepared according to general procedure 2.1 using **1a** (38.4 mg, 0.2 mmol) and was purified by silica gel column chromatography (PE/EtOAc = 8/1) to obtain **2a** as colorless oil (26.9 mg, 60% yield, 14/1 r.r).

The NMR data matched those reported in the literature.<sup>1</sup> <sup>1</sup>H NMR (600 MHz, CDCl<sub>3</sub>) δ 7.65 - 7.57 (m, 4H), 7.48 - 7.43 (m, 2H), 7.40 - 7.33 (m, 3H), 6.57 (s, 1H), 4.23 (d, *J* = 1.4 Hz, 2H), 1.97 (d, *J* = 1.4 Hz, 3H), 1.72 (bs, 1H);

<sup>13</sup>C NMR (151 MHz, CDCl<sub>3</sub>) δ 140.7, 139.1, 137.8, 136.5, 129.3, 128.7, 127.2, 126.9, 126.8, 124.6, 69.0, 15.4.

##### (*E*)-3-(4-fluorophenyl)-2-methylprop-2-en-1-ol (**2b**)

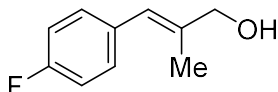

Chemical Formula: C<sub>10</sub>H<sub>11</sub>FO

Exact Mass: 166.0794

**2b** was prepared according to general procedure 2.1 using **1b** (26.8 mg, 0.2 mmol) and was purified by silica gel column chromatography (PE/EtOAc = 8/1) to obtain **2b** as colorless oil (19.4 mg, 58% yield, 25/1 r.r).

The NMR data matched those reported in the literature.<sup>2</sup> <sup>1</sup>H NMR (600 MHz, CDCl<sub>3</sub>) δ 7.25 - 7.21 (m, 2H), 7.04 - 6.99 (m, 2H), 6.49 (s, 1H), 4.18 (d, *J* = 1.5 Hz, 2H), 1.87 (d, *J* = 1.4 Hz, 3H), 1.60 (bs, 1H);

<sup>19</sup>F NMR (565 MHz, CDCl<sub>3</sub>) δ -115.8 (m);

<sup>13</sup>C NMR (151 MHz, CDCl<sub>3</sub>) δ 161.4 (d, *J* = 245.8 Hz), 137.5, 133.5 (d, *J* = 3.3 Hz), 130.4 (d, *J* = 7.8 Hz), 123.9, 115.0 (d, *J* = 21.3 Hz), 68.8, 15.2.

##### (*E*)-2-methyl-3-(4-(trifluoromethyl)phenyl)prop-2-en-1-ol (**2c**)

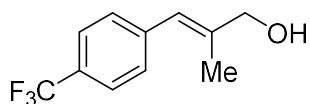

Chemical Formula:  $C_{11}H_{11}F_3O$

Exact Mass: 216.0762

**2c** was prepared according to general procedure 2.1 using **1c** (36.8 mg, 0.2 mmol) and was purified by silica gel column chromatography (PE/EtOAc = 8/1) to obtain **2c** as colorless oil (18.7 mg, 43% yield, 33/1 r.r).

The NMR data matched those reported in the literature.<sup>2</sup>  $^1H$  NMR (600 MHz,  $CDCl_3$ )  $\delta$  7.61 - 7.55 (m, 2H), 7.40 - 7.34 (m, 2H), 6.57 (s, 1H), 4.22 (s, 2H), 1.89 (d,  $J = 1.4$  Hz, 3H), 1.67 (bs, 1H);

$^{19}F$  NMR (565 MHz,  $CDCl_3$ )  $\delta$  -62.41;

$^{13}C$  NMR (151 MHz,  $CDCl_3$ )  $\delta$  141.2, 139.9, 129.0, 128.4 (q,  $J = 32.3$  Hz), 125.1 (q,  $J = 3.8$  Hz), 124.3 (q,  $J = 271.8$  Hz), 123.4, 68.4, 15.3.

#### **(E)-2-benzylideneheptan-1-ol (2d)**

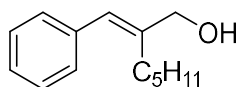

Chemical Formula:  $C_{14}H_{20}O$

Exact Mass: 204.1514

**2d** was prepared according to general procedure 2.1 using **1d** (34.4 mg, 0.2 mmol) and was purified by silica gel column chromatography (PE/EtOAc = 8/1) to obtain **2d** as colorless oil (22.9 mg, 56% yield, 13/1 r.r).

The NMR data matched those reported in the literature.<sup>3</sup>  $^1H$  NMR (600 MHz,  $CDCl_3$ )  $\delta$  7.36 - 7.32 (m, 2H), 7.27 - 7.21 (m, 3H), 6.53 (s, 1H), 4.23 (d,  $J = 1.4$  Hz, 2H), 2.34 - 2.27 (m, 2H), 1.62 (bs, 1H), 1.56 - 1.48 (m, 2H), 1.33 - 1.26 (m, 4H), 0.90 - 0.86 (m, 3H);

$^{13}C$  NMR (151 MHz,  $CDCl_3$ )  $\delta$  142.4, 137.6, 128.6, 128.2, 126.4, 125.3, 67.0, 32.0, 28.7, 28.1, 22.4, 14.0.

#### **(E)-2-(4-chlorobenzylidene)heptan-1-ol (2e)**

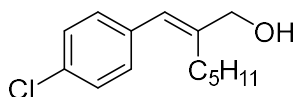

Chemical Formula:  $C_{14}H_{19}ClO$   
Exact Mass: 238.1124

**2e** was prepared according to general procedure 2.1 using **1e** (41.2 mg, 0.2 mmol) and was purified by silica gel column chromatography (PE/EtOAc = 8/1) to obtain **2e** as colorless oil (24.0 mg, 50% yield, 25/1 r.r).

$^1H$  NMR (600 MHz,  $CDCl_3$ )  $\delta$  7.36 - 7.32 (m, 2H), 7.26 - 7.21 (m, 2H), 6.53 (s, 1H), 4.23 (d,  $J$  = 1.4 Hz, 2H), 2.34 - 2.27 (m, 2H), 1.62 (bs, 1H), 1.56 - 1.48 (m, 2H), 1.33 - 1.26 (m, 4H), 0.90 - 0.86 (m, 3H);

$^{13}C$  NMR (151 MHz,  $CDCl_3$ )  $\delta$  142.4, 137.6, 128.6, 128.2, 126.4, 125.3, 67.0, 32.0, 28.7, 28.1, 22.4, 14.0;

HRMS: (ESI) calcd for  $C_{14}H_{18}Cl^+$   $[M-H_2O+H]^+$  221.1092; found 221.1087.

**(E)-2-(4-methoxybenzylidene)pent-4-en-1-ol (2f)**

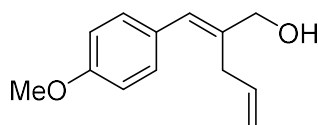

Chemical Formula:  $C_{13}H_{16}O_2$   
Exact Mass: 204.1150

**2f** was prepared according to general procedure 2.1 using **1f** ( mg, 0.2 mmol) and was purified by silica gel column chromatography (PE/EtOAc = 8/1) to obtain **2f** as colorless oil (24.5 mg, 60% yield).

$^1H$  NMR (400 MHz,  $CDCl_3$ )  $\delta$  7.25 - 7.22 (m, 2H), 6.89 - 6.86 (m, 2H), 6.59 (s, 1H), 5.99 - 5.88 (m, 1H), 5.18 - 5.10 (m, 2H), 4.20 (d,  $J$  = 1.4 Hz, 2H), 3.81 (s, 3H), 3.09 - 3.05 (m, 2H), 1.62 (bs, 1H);

$^{13}C$  NMR (151 MHz,  $CDCl_3$ )  $\delta$  158.4, 137.3, 135.7, 129.7, 129.5, 126.6, 116.2, 113.6, 67.1, 55.2, 33.0;

HRMS: (ESI) calcd for  $C_{13}H_{15}O^+$   $[M-H_2O+H]^+$  187.1117; found 187.1114.

**(E)-3-(4-bromophenyl)prop-2-en-1-ol (2g)**

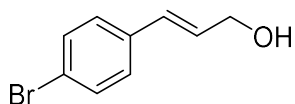

Chemical Formula: C<sub>9</sub>H<sub>9</sub>BrO

Exact Mass: 211.9837

**2g** was prepared according to general procedure 2.1 using **1g** (50.2 mg, 0.2 mmol) and was purified by silica gel column chromatography (PE/EtOAc = 8/1) to obtain **2g** as colorless oil (19.1 mg, 45% yield).

The NMR data matched those reported in the literature.<sup>3</sup> <sup>1</sup>H NMR (600 MHz, CDCl<sub>3</sub>) δ 7.46 - 7.41 (m, 2H), 7.27 - 7.22 (m, 2H), 6.56 (d, *J* = 15.9 Hz, 1H), 6.35 (dt, *J* = 15.9, 5.6 Hz, 1H), 4.32 (dd, *J* = 5.6, 1.6 Hz, 2H), 1.5 (bs, 1H);

<sup>13</sup>C NMR (151 MHz, CDCl<sub>3</sub>) δ 135.6, 131.7, 129.8, 129.3, 128.0, 121.4, 63.5.

**(E)-2-((diethylamino)methyl)-3-phenylprop-2-en-1-ol (2h)**

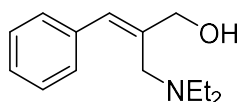

Chemical Formula: C<sub>14</sub>H<sub>21</sub>NO

Exact Mass: 219.1623

**2h** was prepared according to general procedure 2.1 using **1h** (37.4 mg, 0.2 mmol) and was purified by silica gel column chromatography (PE/EtOAc = 4/1, Et<sub>3</sub>N 1%) to obtain **2h** as colorless oil (30.2 mg, 69% yield).

<sup>1</sup>H NMR (600 MHz, CDCl<sub>3</sub>) δ 7.28 - 7.22 (m, 2H), 7.20 - 7.16 (m, 1H), 7.12 - 7.05 (m, 2H), 6.61 (s, 1H), 5.43 (bs, 1H), 4.28 (d, *J* = 1.1 Hz, 2H), 3.35 (d, *J* = 1.3 Hz, 2H), 2.39 (q, *J* = 7.2 Hz, 4H), 0.91 (t, *J* = 7.1 Hz, 6H);

<sup>13</sup>C NMR (151 MHz, CDCl<sub>3</sub>) δ 137.4, 136.7, 130.1, 128.9, 128.2, 126.9, 70.0, 53.0, 46.8, 11.5;

HRMS: (ESI) calcd for C<sub>14</sub>H<sub>22</sub>NO<sup>+</sup> [M+H]<sup>+</sup> 220.1696; found 220.1689.

**(E)-2-((dibenzylamino)methyl)-3-phenylprop-2-en-1-ol (2i)**

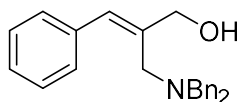

Chemical Formula: C<sub>24</sub>H<sub>25</sub>NO

Exact Mass: 343.1936

**2i** was prepared according to general procedure 2.1 using **1i** (62.2 mg, 0.2 mmol) and was purified by silica gel column chromatography (PE/EtOAc = 6/1) to obtain **2i** as colorless oil (41.2 mg, 60% yield).

The NMR data matched those reported in the literature.<sup>4</sup> <sup>1</sup>H NMR (600 MHz, CDCl<sub>3</sub>) δ 7.37 - 7.33 (m, 2H), 7.32 - 7.28 (m, 5H), 7.27 - 7.23 (m, 6H), 7.19 - 7.16 (m, 2H), 6.73 (s, 1H), 4.61 (bs, 1H), 4.28 (d, *J* = 1.1 Hz, 2H), 3.46 (s, 4H), 3.37 (d, *J* = 1.3 Hz, 2H);

<sup>13</sup>C NMR (151 MHz, CDCl<sub>3</sub>) δ 138.1, 137.9, 136.8, 130.2, 129.2, 129.0, 128.5, 128.2, 127.4, 127.0, 68.9, 58.5, 52.5.

**(E)-3-phenyl-2-(piperidin-1-ylmethyl)prop-2-en-1-ol (2j)**

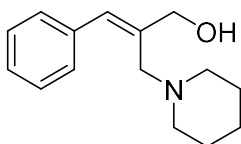

Chemical Formula: C<sub>15</sub>H<sub>21</sub>NO  
Exact Mass: 231.1623

**2j** was prepared according to general procedure 2.1 using **1j** (40.0 mg, 0.2 mmol) and was purified by silica gel column chromatography (PE/EtOAc = 4/1, Et<sub>3</sub>N 1%) to obtain **2j** as colorless oil (25.0 mg, 54% yield).

<sup>1</sup>H NMR (600 MHz, CDCl<sub>3</sub>) δ 7.34 - 7.30 (m, 2H), 7.26 - 7.22 (m, 1H), 7.18 - 7.15 (m, 2H), 6.68 (s, 1H), 5.89 (bs, 1H), 4.35 (d, *J* = 1.1 Hz, 2H), 3.31 (d, *J* = 1.2 Hz, 2H), 2.38 (s, 4H), 1.58 - 1.50 (m, 4H), 1.38 (s, 2H);

<sup>13</sup>C NMR (151 MHz, CDCl<sub>3</sub>) δ 136.7, 136.6, 130.1, 128.8, 128.1, 126.8, 70.3, 58.5, 54.5, 25.9, 23.9;

HRMS: (ESI) calcd for C<sub>15</sub>H<sub>22</sub>NO<sup>+</sup> [M+H]<sup>+</sup> 232.1696; found 232.1689.

**(E)-N-(2-(hydroxymethyl)-3-phenylallyl)-N,4-dimethylbenzenesulfonamide (2k)**

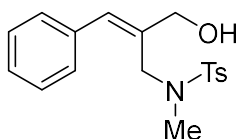

Chemical Formula: C<sub>18</sub>H<sub>21</sub>NO<sub>3</sub>S  
Exact Mass: 331.1242



**2k** was prepared according to general procedure 2.1 using **1k** (59.8 mg, 0.2 mmol) and was purified by silica gel column chromatography (PE/EtOAc = 4/1) to obtain **2k** as colorless oil (20.5 mg, 31% yield).

<sup>1</sup>H NMR (600 MHz, CDCl<sub>3</sub>) δ 7.64 - 7.60 (m, 2H), 7.32 - 7.26 (m, 4H), 7.24 - 7.20 (m, 1H), 7.10 - 7.06 (m, 2H), 6.81 (s, 1H), 4.37 (s, 2H), 3.85 (s, 2H), 2.82 (bs, 1H), 2.57 (s, 3H), 2.42 (s, 3H);

<sup>13</sup>C NMR (151 MHz, CDCl<sub>3</sub>) δ 143.6, 136.3, 135.9, 134.1, 130.9, 129.8, 128.7, 128.3, 127.2, 127.1, 64.8, 46.9, 34.6, 21.5;

HRMS: (ESI) calcd for C<sub>18</sub>H<sub>22</sub>NO<sub>3</sub>S<sup>+</sup> [M+H]<sup>+</sup> 332.1315; found 332.1296.

**(E)-2-(2-(hydroxymethyl)-3-phenylallyl)isoindoline-1,3-dione (2l)**

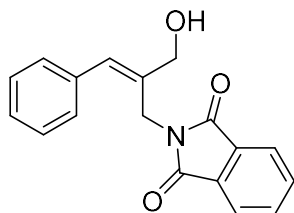

Chemical Formula: C<sub>18</sub>H<sub>15</sub>NO<sub>3</sub>  
Exact Mass: 293.1052

**2l** was prepared according to general procedure 2.1 using **1l** (52.2 mg, 0.2 mmol) and was purified by silica gel column chromatography (PE/EtOAc = 3/1) to obtain **2l** as colorless oil (25.0 mg, 43% yield, 13/1 r.r).

<sup>1</sup>H NMR (600 MHz, CDCl<sub>3</sub>) δ 7.83 - 7.80 (m, 2H), 7.73 - 7.69 (m, 2H), 7.44 - 7.40 (m, 2H), 7.38 - 7.34 (m, 2H), 7.26 - 7.23 (m, 1H), 6.75 (s, 1H), 4.63 (d, *J* = 1.3 Hz, 2H), 4.15 (d, *J* = 5.7 Hz, 2H), 2.76 (t, *J* = 6.67 Hz, 1H);

<sup>13</sup>C NMR (151 MHz, CDCl<sub>3</sub>) δ 168.7, 136.1, 135.1, 134.1, 131.8, 130.9, 128.7, 128.3, 127.2, 123.4, 65.7, 36.0;

HRMS: (ESI) calcd for C<sub>18</sub>H<sub>16</sub>NO<sub>3</sub><sup>+</sup> [M+H]<sup>+</sup> 294.1125; found 294.1126.

**(E)-2-methyl-3-(naphthalen-2-yl)prop-2-en-1-ol (2m)**

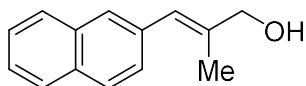

Chemical Formula: C<sub>14</sub>H<sub>14</sub>O  
Exact Mass: 198.1045

**2m** was prepared according to general procedure 2.1 using **1m** (33.2 mg, 0.2 mmol) and was purified by silica gel column chromatography (PE/EtOAc = 8/1) to obtain **2m** as colorless oil (24.6 mg, 62% yield, 17/1 r.r).

The NMR data matched those reported in the literature.<sup>3</sup> <sup>1</sup>H NMR (600 MHz, CDCl<sub>3</sub>) δ 7.85 - 7.79 (m, 3H), 7.75 - 7.73 (m, 1H), 7.50 - 7.41 (m, 3H), 6.75 - 6.63 (m, 1H), 4.25 (d, *J* = 1.6 Hz, 2H), 1.99 (d, *J* = 1.4 Hz, 3H), 1.75 (bs, 1H);

<sup>13</sup>C NMR (151 MHz, CDCl<sub>3</sub>) δ 138.1, 135.0, 133.3, 132.1, 127.8, 127.6, 127.55, 127.47, 127.3, 126.0, 125.7, 125.0, 69.0, 15.4.

**(E)-2-methyl-3-(1-methyl-1H-indol-5-yl)prop-2-en-1-ol (2n)**

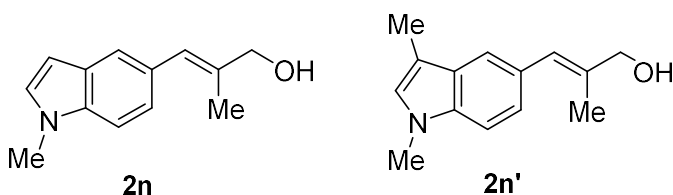

Chemical Formula: C<sub>13</sub>H<sub>15</sub>NO  
Exact Mass: 201.1154

**2n** was prepared according to general procedure 2.1 using **1n** (33.8 mg, 0.2 mmol) and was purified by silica gel column chromatography (PE/EtOAc = 8/1) to obtain a 5:1 mixture of **2n** and **2n'** as colorless oil (25.3 mg, 63% yield, 10/1 r.r).

<sup>1</sup>H NMR (600 MHz, (CD<sub>3</sub>)<sub>2</sub>SO) δ 7.47 - 7.44 (m, 1H), 7.41 - 7.36 (m, 1H), 7.31 - 7.28 (m, 1H), 7.12 - 7.07 (m, 1H), 6.55 (s, 1H), 6.42 - 6.38 (m, 1H), 4.90 (t, *J* = 5.7 Hz, 1H), 3.99 (d, *J* = 5.4 Hz, 2H), 3.78 (s, 3H), 1.85 (d, *J* = 1.4 Hz, 3H);

<sup>13</sup>C NMR (151 MHz, (CD<sub>3</sub>)<sub>2</sub>SO) δ 135.8, 135.1, 129.9, 128.5, 128.0, 124.3, 122.6, 120.2, 109.3, 100.4, 67.1, 32.5, 15.4;

HRMS: (ESI) calcd for C<sub>13</sub>H<sub>16</sub>NO<sub>3</sub><sup>+</sup>[M+H]<sup>+</sup> 202.1226; found 202.1221.

**(E)-3-(dibenzo[*b,d*]thiophen-2-yl)-2-methylprop-2-en-1-ol (2o)**

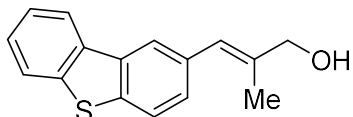

Chemical Formula: C<sub>16</sub>H<sub>14</sub>OS  
Exact Mass: 254.0765

**2o** was prepared according to general procedure 2.1 using **1o** (44.4 mg, 0.2 mmol) and was purified by silica gel column chromatography (PE/EtOAc = 6/1) to obtain **2o** as colorless oil 20.3 mg, 40% yield, 14/1 r.r).

<sup>1</sup>H NMR (600 MHz, CDCl<sub>3</sub>) δ 8.16 - 8.11 (m, 1H), 8.07 - 8.04 (m, 1H), 7.88 - 7.83 (m, 1H), 7.81 (d, *J* = 8.2 Hz, 1H), 7.48 - 7.44 (m, 2H), 7.42 - 7.37 (m, 1H), 6.71 (s, 1H), 4.26 (s, 2H), 1.99 (d, *J* = 1.4 Hz, 3H), 1.68 (bs, 1H);

<sup>13</sup>C NMR (151 MHz, CDCl<sub>3</sub>) δ 139.8, 137.7, 137.5, 135.5, 135.4, 134.0, 127.8, 126.7, 124.9, 124.3, 122.9, 122.4, 121.6, 121.5, 69.0, 15.4;

HRMS: (ESI) calcd for C<sub>16</sub>H<sub>13</sub>S<sup>+</sup> [M-H<sub>2</sub>O+H]<sup>+</sup> 237.0732; found 237.0725.

**(E)-3-(dibenzo[*b,d*]furan-2-yl)-2-methylprop-2-en-1-ol (2p)**

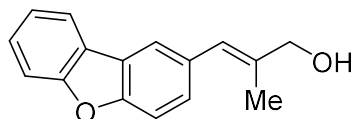

Chemical Formula: C<sub>16</sub>H<sub>14</sub>O<sub>2</sub>  
Exact Mass: 238.0994

**2p** was prepared according to general procedure 2.1 using **1p** (41.2 mg, 0.2 mmol) and was purified by silica gel column chromatography (PE/EtOAc = 6/1) to obtain **2p** as colorless oil 23.8 mg, 50% yield).

<sup>1</sup>H NMR (600 MHz, CDCl<sub>3</sub>) δ 7.96 - 7.92 (m, 1H), 7.86 - 7.83 (m, 1H), 7.58 - 7.55 (m, 1H), 7.54 - 7.51 (m, 1H), 7.48 - 7.44 (m, 1H), 7.39 - 7.31 (m, 2H), 6.69 (s, 1H), 4.25 (d, *J* = 1.5 Hz, 2H), 1.97 (d, *J* = 1.4 Hz, 3H), 1.67 (bs, 1H);

<sup>13</sup>C NMR (151 MHz, CDCl<sub>3</sub>) δ 156.5, 154.9, 137.1, 132.4, 128.3, 127.1, 125.0, 124.15, 124.13, 122.7, 120.64, 120.57, 111.7, 111.2, 69.0, 15.3;

HRMS: (ESI) calcd for C<sub>16</sub>H<sub>13</sub>O<sup>+</sup> [M-H<sub>2</sub>O+H]<sup>+</sup> 221.0961; found 221.0956.

**(8*S*,9*R*,13*R*,14*R*)-3-((*E*)-2-(hydroxymethyl)hept-1-en-1-yl)-13-methyl-6,7,8,9,11,12,13,14,15,16-decahydro-17*H*-cyclopenta[*a*]phenanthren-17-one (2q)**

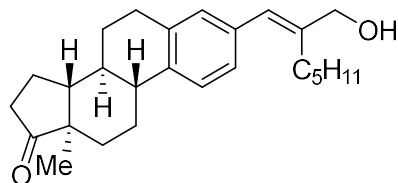

Chemical Formula: C<sub>26</sub>H<sub>36</sub>O<sub>2</sub>  
Exact Mass: 380.2715

**2q** was prepared according to general procedure 2.1 using **1q** (69.6 mg, 0.2 mmol) and was purified by silica gel column chromatography (PE/EtOAc = 6/1) to obtain **2q** as colorless oil (47.2 mg, 62% yield, 13/1 r.r).

<sup>1</sup>H NMR (600 MHz, CDCl<sub>3</sub>) δ 7.26 - 7.24 (m, 1H), 7.08 - 7.04 (m, 1H), 7.01 - 6.98 (m, 1H), 6.45 (s, 1H), 4.21 (d, *J* = 1.4 Hz, 2H), 2.93 - 2.89 (m, 2H), 2.53 - 2.48 (m, 1H), 2.45 - 2.41 (m, 1H), 2.32 - 2.27 (m, 3H), 2.18 - 2.12 (m, 1H), 2.08 - 2.01 (m, 2H), 1.99 - 1.95 (m, 1H), 1.69 - 1.59 (m, 3H), 1.56 - 1.45 (m, 6H), 1.34 - 1.28 (m, 4H), 0.92 (s, 3H), 0.91 - 0.88 (m, 3H);

<sup>13</sup>C NMR (151 MHz, CDCl<sub>3</sub>) δ 221.0, 142.0, 138.0, 136.1, 135.0, 129.3, 126.0, 125.1, 124.9, 67.2, 50.5, 48.0, 44.3, 38.1, 35.8, 32.0, 31.5, 29.4, 28.8, 28.1, 26.5, 25.6, 22.4, 21.5, 14.0, 13.8;

HRMS: (ESI) calcd for C<sub>26</sub>H<sub>37</sub>O<sub>2</sub><sup>+</sup> [M+H]<sup>+</sup> 381.2788; found 381.2786.

**(*E*)-3-(3-aminophenyl)prop-2-en-1-ol (2r)**

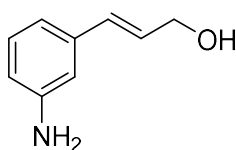

Chemical Formula: C<sub>9</sub>H<sub>11</sub>NO  
Exact Mass: 149.0841

**2r** was prepared according to general procedure 2.1 using **1r** (23.4 mg, 0.2 mmol) and was purified by silica gel column chromatography (PE/EtOAc = 1/2, Et<sub>3</sub>N 1%) to obtain **2r** as colorless oil (15.0 mg, 50% yield).

The NMR data matched those reported in the literature.<sup>5</sup> <sup>1</sup>H NMR (400 MHz, CDCl<sub>3</sub>) δ 7.15 - 7.09 (m, 1H), 6.82 - 6.79 (m, 1H), 6.74 - 6.70 (m, 1H), 6.61 - 6.49 (m, 2H), 6.36 - 6.27 (m, 1H), 4.31 (dd, *J* = 5.8, 1.5 Hz, 2H), 3.67 (bs, 2H), 1.25 (bs, 1H);

<sup>13</sup>C NMR (151 MHz, CDCl<sub>3</sub>) δ 146.5, 137.7, 131.3, 129.5, 128.3, 117.1, 114.7, 113.0, 63.8.

**(E)-3-(4-methoxyphenyl)prop-2-en-1-ol (2s)**

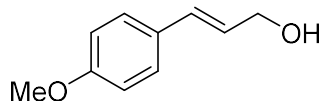

Chemical Formula: C<sub>10</sub>H<sub>12</sub>O<sub>2</sub>

Exact Mass: 164.0837

**2s** was prepared according to general procedure 2.1 using **1s** (26.4 mg, 0.2 mmol) and was purified by silica gel column chromatography (PE/EtOAc = 8/1) to obtain **2s** as colorless oil (10.9 mg, 33% yield).

The NMR data matched those reported in the literature.<sup>6</sup> <sup>1</sup>H NMR (600 MHz, CDCl<sub>3</sub>) δ 7.35 - 7.30 (m, 2H), 6.88 - 6.84 (m, 2H), 6.56 (dt, *J* = 15.8, 1.6 Hz, 1H), 6.24 (dt, *J* = 15.9, 6.0 Hz, 1H), 4.30 (d, *J* = 4.7 Hz, 2H), 3.81 (s, 3H), 1.43 (bs, 1H);

<sup>13</sup>C NMR (151 MHz, CDCl<sub>3</sub>) δ 159.3, 131.0, 129.4, 127.7, 126.2, 114.0, 64.0, 55.3.

**(E)-2,3-diphenylprop-2-en-1-ol (2t)**

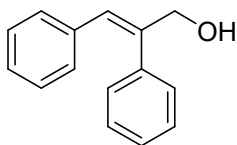

Chemical Formula: C<sub>15</sub>H<sub>14</sub>O

Exact Mass: 210.1045

**2t** was prepared according to general procedure 2.1 using **1t** (35.6 mg, 0.2 mmol) and was purified by silica gel column chromatography (PE/EtOAc = 8/1) to obtain **2t** as colorless oil (25.2 mg, 60% yield).

The NMR data matched those reported in the literature.<sup>7</sup> <sup>1</sup>H NMR (600 MHz, CDCl<sub>3</sub>) δ 7.37 - 7.29 (m, 3H), 7.25 - 7.21 (m, 2H), 7.15 - 7.09 (m, 3H), 7.03 - 6.98 (m, 2H), 6.70 (s, 1H), 4.47 (s, 2H), 1.79 (bs, 1H);

<sup>13</sup>C NMR (151 MHz, CDCl<sub>3</sub>) δ 141.4, 138.5, 136.4, 129.2, 128.8, 128.7, 127.9, 127.5, 126.8, 126.4, 68.5.

**(E)-2,3-bis(4-chlorophenyl)prop-2-en-1-ol (2u)**

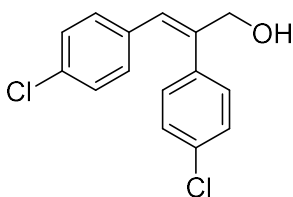

Chemical Formula: C<sub>15</sub>H<sub>12</sub>Cl<sub>2</sub>O

Exact Mass: 278.0265

**2u** was prepared according to general procedure 2.1 using **1u** (49.2 mg, 0.2 mmol) and was purified by silica gel column chromatography (PE/EtOAc = 8/1) to obtain **2u** as colorless oil (27.3 mg, 49% yield).

The NMR data matched those reported in the literature.<sup>8</sup> <sup>1</sup>H NMR (600 MHz, CDCl<sub>3</sub>) δ 7.33 - 7.29 (m, 2H), 7.16 - 7.09 (m, 4H), 6.93 - 6.89 (m, 2H), 6.66 (s, 1H), 4.43 (d, *J* = 1.6 Hz, 2H), 1.76 (bs, 1H);

<sup>13</sup>C NMR (151 MHz, CDCl<sub>3</sub>) δ 140.9, 136.5, 134.6, 133.7, 132.7, 130.4, 130.1, 129.1, 128.3, 125.9, 68.0.

**(E)-2,3-bis(4-fluorophenyl)prop-2-en-1-ol (2v)**

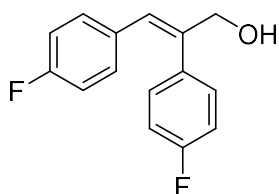

Chemical Formula: C<sub>15</sub>H<sub>12</sub>F<sub>2</sub>O

Exact Mass: 246.0856

**2v** was prepared according to general procedure 2.1 using **1v** (42.8 mg, 0.2 mmol) and was purified by silica gel column chromatography (PE/EtOAc = 8/1) to obtain **2v** as colorless oil (27.6 mg, 56% yield).

<sup>1</sup>H NMR (600 MHz, CDCl<sub>3</sub>) δ 7.20 - 7.15 (m, 2H), 7.06 - 7.00 (m, 2H), 6.97 - 6.92 (m, 2H), 6.86 - 6.79 (m, 2H), 6.66 (s, 1H), 4.43 (d, *J* = 1.5 Hz, 2H), 1.77 (bs, 1H);

<sup>19</sup>F NMR (565 MHz, CDCl<sub>3</sub>) δ -114.10 (m), -114.63 (m);

<sup>13</sup>C NMR (151 MHz, CDCl<sub>3</sub>) δ 162.3 (d, *J* = 246.9 Hz), 161.7 (d, *J* = 247.0 Hz), 140.2 (d, *J* = 1.8 Hz), 134.1 (d, *J* = 3.7 Hz), 132.3 (d, *J* = 3.5 Hz), 130.8 (d, *J* = 7.8 Hz), 130.5 (d, *J* = 7.8 Hz), 125.9, 116.0 (d, *J* = 21.3 Hz), 115.0 (d, *J* = 21.3 Hz), 68.3.

HRMS: (ESI) calcd for C<sub>15</sub>H<sub>11</sub>F<sub>2</sub><sup>+</sup> [M-H<sub>2</sub>O+H]<sup>+</sup> 229.0823; found 229.0816.

**(E)-2,3-bis(4-methoxyphenyl)prop-2-en-1-ol (2w)**

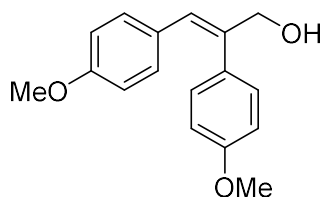

Chemical Formula: C<sub>17</sub>H<sub>18</sub>O<sub>3</sub>  
Exact Mass: 270.1256

**2w** was prepared according to general procedure 2.1 using **1w** (47.6 mg, 0.2 mmol) and was purified by silica gel column chromatography (PE/EtOAc = 8/1) to obtain **2w** as colorless oil (34.0 mg, 63% yield).

The NMR data matched those reported in the literature.<sup>9</sup> <sup>1</sup>H NMR (600 MHz, CDCl<sub>3</sub>) δ 7.18 - 7.15 (m, 2H), 6.98 - 6.95 (m, 2H), 6.89 - 6.86 (m, 2H), 6.69 - 6.66 (m, 2H), 6.58 (s, 1H), 4.42 (d, *J* = 1.2 Hz, 2H), 3.82 (s, 3H), 3.74 (s, 3H), 1.7 (bs, 1H);

<sup>13</sup>C NMR (151 MHz, CDCl<sub>3</sub>) δ 158.9, 158.3, 139.0, 130.7, 130.4, 129.9, 129.2, 125.92, 125.90, 114.2, 68.8, 55.2, 55.1.

**(E)-2,3-di(furan-3-yl)prop-2-en-1-ol (2x)**

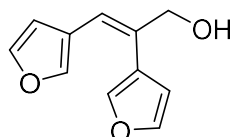

Chemical Formula: C<sub>11</sub>H<sub>10</sub>O<sub>3</sub>  
Exact Mass: 190.0630

**2x** was prepared according to general procedure 2.1 using **1x** (31.6 mg, 0.2 mmol) and was purified by silica gel column chromatography (PE/EtOAc = 8/1) to obtain **2x** as colorless oil (20.1 mg, 53% yield).

<sup>1</sup>H NMR (600 MHz, (CD<sub>3</sub>)<sub>2</sub>SO) δ 7.75 - 7.63 (m, 2H), 7.63 - 7.56 (m, 1H), 7.54 - 7.48 (m, 1H), 6.48 - 6.42 (m, 1H), 6.40 - 6.36 (m, 1H), 6.17 - 6.15 (m, 1H), 5.15 (bs, 1H), 4.10 (d, *J* = 2.4 Hz, 2H);

<sup>13</sup>C NMR (151 MHz, (CD<sub>3</sub>)<sub>2</sub>SO) δ 143.6, 143.5, 142.1, 140.8, 133.1, 122.7, 122.6, 115.5, 111.5, 110.5, 65.8;

HRMS: (ESI) calcd for C<sub>11</sub>H<sub>9</sub>O<sub>2</sub><sup>+</sup>[M-H<sub>2</sub>O+H]<sup>+</sup> 173.0597; found 173.0593.

**(E)-2,3-di(thiophen-3-yl)prop-2-en-1-ol (2y)**

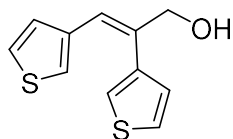

Chemical Formula: C<sub>11</sub>H<sub>10</sub>OS<sub>2</sub>  
Exact Mass: 222.0173

**2y** was prepared according to general procedure 2.1 using **1y** (38 mg, 0.2 mmol) and was purified by silica gel column chromatography (PE/EtOAc = 8/1) to obtain **2y** as colorless oil (22.2 mg, 50% yield).

<sup>1</sup>H NMR (600 MHz, CDCl<sub>3</sub>) δ 7.36 - 7.32 (m, 1H), 7.21 - 7.20 (m, 1H), 7.11 - 7.08 (m, 1H), 6.99 - 6.93 (m, 2H), 6.69 (s, 1H), 6.66 - 6.63 (m, 1H), 4.40 (d, *J* = 1.4 Hz, 2H), 1.75 (bs, 1H);  
<sup>13</sup>C NMR (151 MHz, CDCl<sub>3</sub>) δ 138.7, 137.9, 135.2, 128.2, 127.9, 125.9, 124.8, 124.0, 123.1, 121.8, 68.3;

HRMS: (ESI) calcd for C<sub>11</sub>H<sub>10</sub>OS<sub>2</sub> Na<sup>+</sup>[M+Na]<sup>+</sup> 245.0065; found 245.0061.

**(E)-2-propylhex-2-en-1-ol (2z)**

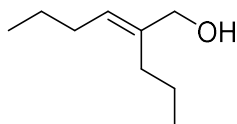

Chemical Formula: C<sub>9</sub>H<sub>18</sub>O  
Exact Mass: 142.1358

**2z** was prepared according to general procedure 2.1 using **1z** (33.0 mg, 0.3 mmol) and was purified by silica gel column chromatography (PE/EtOAc = 10/1) to obtain **2z** as colorless oil (37.1 mg, 87% yield).

The NMR data matched those reported in the literature.<sup>10</sup> <sup>1</sup>H NMR (400 MHz, CDCl<sub>3</sub>) δ 5.41 (t, *J* = 7.3 Hz, 1H), 4.02 (d, *J* = 1.1 Hz, 2H), 2.08 - 1.99 (m, 4H), 1.45 - 1.33 (m, 5H), 0.90 (t, *J* = 7.4 Hz, 6H);

<sup>13</sup>C NMR (151 MHz, CDCl<sub>3</sub>) δ 139.0, 127.1, 67.2, 30.0, 29.5, 22.9, 21.7, 14.2, 13.9.

**(E)-cyclododec-1-en-1-ylmethanol (2aa)**



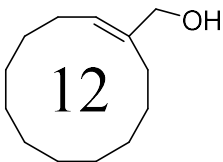

Chemical Formula: C<sub>13</sub>H<sub>24</sub>O

Exact Mass: 196.1827

**2aa** was prepared according to general procedure 2.1 using **1aa** (32.8 mg, 0.2 mmol) and was purified by silica gel column chromatography (PE/EtOAc = 8/1) to obtain **2aa** as colorless oil (21.2 mg, 54% yield).

The NMR data matched those reported in the literature.<sup>11</sup> <sup>1</sup>H NMR (400 MHz, CDCl<sub>3</sub>) δ 5.42 (t, *J* = 7.8 Hz, 1H), 4.05 (s, 2H), 2.20 (t, *J* = 7.0 Hz, 2H), 2.10 (q, *J* = 7.2 Hz, 2H), 1.56 - 1.50 (m, 2H), 1.47 - 1.42 (m, 2H), 1.40 - 1.32 (m, 9H), 1.28 - 1.22 (m, 4H);

<sup>13</sup>C NMR (151 MHz, CDCl<sub>3</sub>) δ 138.9, 127.9, 66.8, 26.9, 25.1, 24.9, 24.7, 24.5, 24.2, 24.1, 23.9, 22.4, 22.3.

**(Z)-2-((benzyloxy)methyl)but-2-en-1-ol (2ab)**

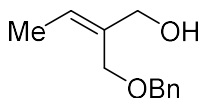

Chemical Formula: C<sub>12</sub>H<sub>16</sub>O<sub>2</sub>

Exact Mass: 192.1150

**2ab** was prepared according to general procedure 2.1 using **1ab** (32.0 mg, 0.2 mmol) and was purified by silica gel column chromatography (PE/EtOAc = 8/1) to obtain **2ab** as colorless oil (18.8 mg, 49% yield).

The NMR data matched those reported in the literature.<sup>12</sup> <sup>1</sup>H NMR (400 MHz, CDCl<sub>3</sub>) δ 7.37 - 7.29 (m, 5H), 5.73 (q, *J* = 7.0 Hz, 1H), 4.53 (s, 2H), 4.19 (s, 2H), 4.15 (s, 2H), 2.18 (bs, 1H), 1.67 (d, *J* = 6.9 Hz, 3H);

<sup>13</sup>C NMR (151 MHz, CDCl<sub>3</sub>) δ 137.9, 135.7, 128.4, 127.76, 127.75, 126.3, 72.6, 67.1, 66.7, 13.2.

**(Z)-2-((benzyloxy)methyl)hex-2-en-1-ol (2ac)**

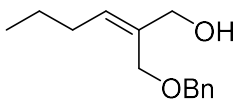

Chemical Formula: C<sub>14</sub>H<sub>20</sub>O<sub>2</sub>  
Exact Mass: 220.1463

**2ac** was prepared according to general procedure 2.1 using **1ac** (37.6 mg, 0.2 mmol) and was purified by silica gel column chromatography (PE/EtOAc = 8/1) to obtain **2ac** as colorless oil (25.1 mg, 57% yield).

<sup>1</sup>H NMR (400 MHz, CDCl<sub>3</sub>) δ 7.36 - 7.33 (m, 4H), 7.32 - 7.28 (m, 1H), 5.64 (tt, *J* = 7.5, 1.1 Hz, 1H), 4.52 (s, 2H), 4.16 (d, *J* = 6.2 Hz, 4H), 2.23 (bs, 1H), 2.03 (q, *J* = 7.5 Hz, 2H), 1.39 (q, *J* = 7.4 Hz, 2H), 0.90 (t, *J* = 7.4 Hz, 3H);

<sup>13</sup>C NMR (151 MHz, CDCl<sub>3</sub>) δ 137.9, 134.9, 131.9, 128.4, 127.74, 127.72, 72.5, 67.1, 67.0, 29.5, 22.7, 13.7;

HRMS: (ESI) calcd for C<sub>14</sub>H<sub>21</sub>O<sub>2</sub><sup>+</sup>[M+H]<sup>+</sup> 221.1536; found 221.1532.

**(E)-2-((dibenzylamino)methyl)but-2-en-1-ol (2ad)**

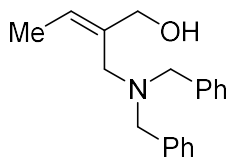

Chemical Formula: C<sub>19</sub>H<sub>23</sub>NO  
Exact Mass: 281.1780

**2ad** was prepared according to general procedure 2.1 using **1ad** (49.8 mg, 0.2 mmol) and was purified by silica gel column chromatography (PE/EtOAc = 8/1) to obtain **2ad** as colorless oil (28.1 mg, 50% yield).

The NMR data matched those reported in the literature.<sup>4</sup> <sup>1</sup>H NMR (400 MHz, CDCl<sub>3</sub>) δ 7.35 - 7.32 (m, 8H), 7.29 - 7.27 (m, 1H), 7.26 - 7.24 (m, 1H), 5.72 (q, *J* = 6.9 Hz, 1H), 4.62 (bs, 1H), 4.06 (s, 2H), 3.55 (s, 4H), 3.17 (s, 2H), 1.69 (d, *J* = 6.8 Hz, 3H);

<sup>13</sup>C NMR (151 MHz, CDCl<sub>3</sub>) δ 138.4, 135.2, 129.1, 128.5, 127.3, 125.9, 69.6, 58.5, 52.5, 13.1.

**(E)-2-(2-(benzyloxy)ethyl)pent-2-en-1-ol (2ae)**

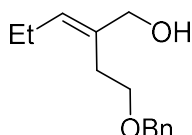

Chemical Formula: C<sub>14</sub>H<sub>20</sub>O<sub>2</sub>  
 Exact Mass: 220.1463

**2ae** was prepared according to general procedure 2.1 using **1ae** (49.8 mg, 0.2 mmol) and was purified by silica gel column chromatography (PE/EtOAc = 8/1) to obtain **2ae** as colorless oil (26.9 mg, 61% yield, 1/1 r.r).

<sup>1</sup>H NMR (400 MHz, CDCl<sub>3</sub>) δ 7.36 - 7.27 (m, 5H), 5.54 - 5.37 (m, 1H), 4.57 - 4.51 (m, 2H), 4.07 - 3.93 (m, 2H), 3.58 - 3.48 (m, 2H), 2.47 - 2.35 (m, 2H), 2.16 - 2.01 (m, 2H), 1.84 - 1.45 (m, 1H), 1.02 - 0.94 (m, 3H);

<sup>13</sup>C NMR (151 MHz, CDCl<sub>3</sub>) δ 142.6, 138.3, 137.6, 135.7, 131.7, 128.4, 128.3, 127.73, 127.70, 127.6, 127.5, 121.7, 73.1, 72.9, 69.9, 69.5, 68.4, 66.5, 29.3, 27.9, 21.1, 20.9, 14.1, 13.2;

HRMS: (ESI) calcd for C<sub>14</sub>H<sub>20</sub>O<sub>2</sub><sup>+</sup>[M+H]<sup>+</sup> 221.1536; found 221.1532.

#### (E)-2-benzylidenebut-3-en-1-ol (**2af**)

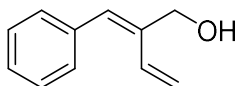

Chemical Formula: C<sub>11</sub>H<sub>12</sub>O  
 Exact Mass: 160.0888

**2af** was prepared according to general procedure 2.1 using **1af** (25.6 mg, 0.2 mmol) and was purified by silica gel column chromatography (PE/EtOAc = 8/1) to obtain **2af** as colorless oil (13.5 mg, 42% yield, 10/1 r.r).

The NMR data matched those reported in the literature.<sup>12</sup> <sup>1</sup>H NMR (400 MHz, CDCl<sub>3</sub>) δ 7.38 - 7.33 (m, 2H), 7.31 - 7.26 (m, 3H), 6.84 - 6.75 (m, 1H), 6.75 (s, 1H), 5.54 - 5.44 (m, 1H), 5.28 - 5.22 (m, 1H), 4.49 (s, 2H), 1.62 (bs, 1H);

<sup>13</sup>C NMR (151 MHz, CDCl<sub>3</sub>) δ 137.3, 136.6, 132.5, 129.6, 129.4, 128.1, 127.2, 115.8, 64.5.

#### (E)-N-(2-(hydroxymethyl)-3-phenylallyl)-4-methyl-N-(2-methylallyl)benzenesulfonamide (**2ag**)

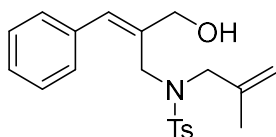

Chemical Formula:  $C_{21}H_{25}NO_3S$   
Exact Mass: 371.1555

**2ag** was prepared according to general procedure 2.1 using **1ag** (25.6 mg, 0.2 mmol) and was purified by silica gel column chromatography (PE/EtOAc = 4/1) to obtain **2ag** as colorless oil (32.0 mg, 43% yield).

$^1H$  NMR (600 MHz,  $CDCl_3$ )  $\delta$  7.64 - 7.60 (m, 2H), 7.31 - 7.25 (m, 2H), 7.27 - 7.20 (m, 3H), 7.09 - 7.05 (m, 2H), 6.74 (s, 1H), 4.56 - 4.52 (m, 1H), 4.39 - 4.35 (m, 1H), 4.32 (d,  $J$  = 1.1 Hz, 2H), 4.03 - 4.00 (m, 2H), 3.54 (s, 2H), 3.06 (bs, 1H), 2.41 (s, 3H), 1.43 (s, 3H);

$^{13}C$  NMR (151 MHz,  $CDCl_3$ )  $\delta$  143.5, 139.2, 136.8, 136.2, 136.1, 131.3, 129.7, 128.8, 128.1, 127.2, 127.0, 114.7, 64.9, 54.6, 44.7, 21.5, 19.9;

HRMS: (ESI) calcd for  $C_{21}H_{24}NO_2S^+$   $[M-H_2O+H]^+$  354.1522 ; found 354.1523.

**(E)-3-benzylidene-7a-hydroxy-4a-methylhexahydrocyclopenta[b]pyran-5(2H)-one (7a)**

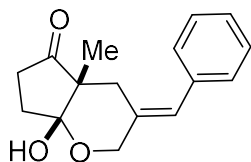

Chemical Formula:  $C_{16}H_{18}O_3$   
Exact Mass: 258.1256

**7a** was prepared according to general procedure 2.2 using **6a** (45.6 mg, 0.2 mmol) and was purified by silica gel column chromatography (PE/EtOAc = 6/1) to obtain **7a** as white solid (37.2 mg, 63% yield).

$^1H$  NMR (600 MHz,  $CDCl_3$ )  $\delta$  7.38 - 7.33 (m, 4H), 7.25 - 7.21 (m, 1H), 6.35 (s, 1H), 4.56 (dt,  $J$  = 12.3, 1.6 Hz, 1H), 3.91 (dd,  $J$  = 12.2, 2.0 Hz, 1H), 3.19 (dd,  $J$  = 14.6, 2.0 Hz, 1H), 2.69 (bs, 1H), 2.46 - 2.38 (m, 2H), 2.24 - 2.07 (m, 3H), 1.05 (s, 3H);

$^{13}C$  NMR (151 MHz,  $CDCl_3$ )  $\delta$  216.4, 136.3, 132.6, 128.8, 128.2, 126.8, 125.6, 103.1, 66.6, 53.0, 35.1, 32.9, 29.8, 20.7;

HRMS: (ESI) calcd for  $C_{16}H_{19}O_3^+$   $[M+H]^+$  259.1329; found 259.1337.

**(E)-7a-hydroxy-4a-methyl-3-(4-methylbenzylidene)hexahydrocyclopenta[b]pyran-5(2H)-one (7b)**

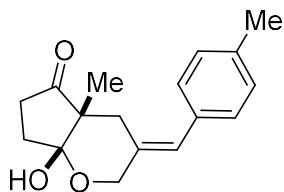

Chemical Formula: C<sub>17</sub>H<sub>20</sub>O<sub>3</sub>  
Exact Mass: 272.1412

**7b** was prepared according to general procedure 2.2 using **6b** (48 mg, 0.2 mmol) and was purified by silica gel column chromatography (PE/EtOAc = 6/1) to obtain **7b** as colorless oil (32.7 mg, 60% yield).

<sup>1</sup>H NMR (400 MHz, CDCl<sub>3</sub>) δ 7.26 - 7.22 (m, 2H), 7.19 - 7.13 (m, 2H), 6.32 (s, 1H), 4.55 (dt, *J* = 12.2, 1.6 Hz, 1H), 3.89 (dd, *J* = 12.2, 2.0 Hz, 1H), 3.19 (dd, *J* = 14.6, 2.0 Hz, 1H), 2.90 (bs, 1H), 2.46 - 2.39 (m, 2H), 2.35 (s, 3H), 2.20 - 2.11 (m, 3H), 1.04 (s, 3H);

<sup>13</sup>C NMR (151 MHz, CDCl<sub>3</sub>) δ 216.5, 136.4, 133.4, 131.9, 128.9, 128.7, 125.5, 103.1, 66.6, 53.0, 35.1, 32.8, 29.8, 21.2, 20.6;

HRMS: (ESI) calcd for C<sub>17</sub>H<sub>21</sub>O<sub>3</sub><sup>+</sup>[M+H]<sup>+</sup> 273.1485; found 273.1481.

**(E)-7a-hydroxy-3-(4-methoxybenzylidene)-4a-methylhexahydrocyclopenta[b]pyran-5(2H)-one (7c)**

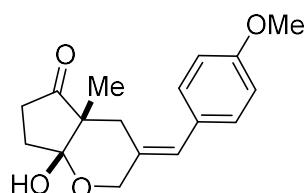

Chemical Formula: C<sub>17</sub>H<sub>20</sub>O<sub>4</sub>  
Exact Mass: 288.1362

**7c** was prepared according to general procedure 2.2 using **6c** (51.2 mg, 0.2 mmol) and was purified by silica gel column chromatography (PE/EtOAc = 6/1) to obtain **7c** as colorless oil (45.0 mg, 78% yield).

<sup>1</sup>H NMR (400 MHz, CDCl<sub>3</sub>) δ 7.34 - 7.26 (m, 2H), 6.94 - 6.85 (m, 2H), 6.29 (s, 1H), 4.61 - 4.50 (m, 1H), 3.97 - 3.83 (m, 1H), 3.81 (s, 3H), 3.28 - 3.06 (m, 1H), 2.74 (bs, 1H), 2.53 - 2.31 (m, 2H), 2.24 - 2.08 (m, 3H), 1.05 (s, 3H);

$^{13}\text{C}$  NMR (151 MHz,  $\text{CDCl}_3$ )  $\delta$  216.6, 158.4, 131.2, 130.0, 128.9, 125.1, 113.7, 103.1, 66.7, 55.2, 53.0, 35.1, 32.9, 29.7, 20.7;

HRMS: (ESI) calcd for  $\text{C}_{17}\text{H}_{20}\text{O}_4\text{Na}^+[\text{M}+\text{Na}]^+$  311.1254; found 311.1253.

**ethyl**            **(E)-4-((7a-hydroxy-4a-methyl-5-oxohexahydrocyclopenta[b]pyran-3(2H)-ylidene)methyl)benzoate (7d)**

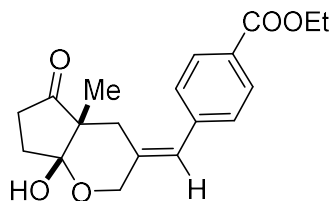

Chemical Formula:  $\text{C}_{19}\text{H}_{22}\text{O}_5$   
Exact Mass: 330.1467

**7d** was prepared according to general procedure 2.2 using **6d** (59.6 mg, 0.2 mmol) and was purified by silica gel column chromatography (PE/EtOAc = 6/1) to obtain **7d** as colorless oil (37.0 mg, 56% yield).

$^1\text{H}$  NMR (600 MHz,  $\text{CDCl}_3$ )  $\delta$  8.05 - 8.01 (m, 2H), 7.44 - 7.40 (m, 2H), 6.37 (s, 1H), 4.57 (dt,  $J$  = 12.2, 1.6 Hz, 1H), 4.38 (q,  $J$  = 7.2 Hz, 2H), 3.92 - 3.89 (m, 1H), 3.15 (dd,  $J$  = 14.6, 2.0 Hz, 1H), 2.46 (bs, 1H), 2.46 - 2.37 (m, 2H), 2.21 - 2.11 (m, 3H), 1.39 (t,  $J$  = 7.1 Hz, 3H), 1.05 (s, 3H);

$^{13}\text{C}$  NMR (151 MHz,  $\text{CDCl}_3$ )  $\delta$  216.2, 166.6, 141.0, 134.7, 129.6, 128.78, 128.77, 124.9, 103.1, 66.5, 60.9, 53.1, 35.1, 32.9, 29.8, 20.7, 14.4;

HRMS: (ESI) calcd for  $\text{C}_{19}\text{H}_{23}\text{O}_5^+[\text{M}+\text{H}]^+$  331.1540; found 331.1541.

**(E)-3-(4-chlorobenzylidene)-7a-hydroxy-4a-methylhexahydrocyclopenta[b]pyran-5(2H)-one (7e)**

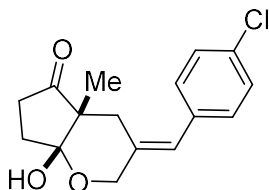

Chemical Formula:  $\text{C}_{16}\text{H}_{17}\text{ClO}_3$   
Exact Mass: 292.0866

**7e** was prepared according to general procedure 2.2 using **6e** (52 mg, 0.2 mmol) and was purified by silica gel column chromatography (PE/EtOAc = 6/1) to obtain **7e** as colorless oil (45.0 mg, 77% yield).

<sup>1</sup>H NMR (400 MHz, CDCl<sub>3</sub>) δ 7.36 - 7.24 (m, 4H), 6.28 (s, 1H), 4.54 (d, *J* = 12.1 Hz, 1H), 3.87 (dd, *J* = 12.2, 2.1 Hz, 1H), 3.11 (dd, *J* = 14.5, 2.1 Hz, 1H), 2.87 (bs, 1H), 2.51 - 2.37 (m, 2H), 2.23 - 2.01 (m, 3H), 1.04 (s, 3H);

<sup>13</sup>C NMR (151 MHz, CDCl<sub>3</sub>) δ 216.5, 134.7, 133.4, 132.5, 130.1, 128.4, 124.4, 103.0, 66.4, 53.1, 35.1, 32.8, 29.6, 20.6;

HRMS: (ESI) calcd for C<sub>16</sub>H<sub>17</sub>ClO<sub>3</sub>Na<sup>+</sup>[M+Na]<sup>+</sup> 315.0758; found 315.0763.

**(E)-3-(4-fluorobenzylidene)-7a-hydroxy-4a-methylhexahydrocyclopenta[b]pyran-5(2H)-one (7f)**

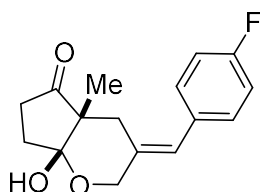

Chemical Formula: C<sub>16</sub>H<sub>17</sub>FO<sub>3</sub>  
Exact Mass: 276.1162

**7f** was prepared according to general procedure 2.2 using **6f** (48.8 mg, 0.2 mmol) and was purified by silica gel column chromatography (PE/EtOAc = 6/1) to obtain **7f** as colorless oil (33.2 mg, 60% yield).

<sup>1</sup>H NMR (400 MHz, CDCl<sub>3</sub>) δ 7.36 - 7.29 (m, 2H), 7.09 - 7.00 (m, 2H), 6.30 (s, 1H), 4.55 (dt, *J* = 12.2, 1.5 Hz, 1H), 3.88 (dd, *J* = 12.2, 2.0 Hz, 1H), 3.12 (dd, *J* = 14.5, 1.9 Hz, 1H), 2.70 (bs, 1H), 2.53 - 2.34 (m, 2H), 2.24 - 2.06 (m, 3H), 1.05 (s, 3H);

<sup>19</sup>F NMR (376 MHz, CDCl<sub>3</sub>) δ - 115.27 (m);

<sup>13</sup>C NMR (151 MHz, CDCl<sub>3</sub>) δ 216.5, 161.7 (d, *J* = 245.9 Hz), 132.7, 132.3 (d, *J* = 3.2 Hz), 130.4 (d, *J* = 8.1 Hz), 124.5, 115.1 (d, *J* = 21.2 Hz), 103.1, 66.5, 53.1, 35.1, 32.8, 29.6, 20.7;

HRMS: (ESI) calcd for C<sub>16</sub>H<sub>17</sub>FO<sub>3</sub>Na<sup>+</sup>[M+Na]<sup>+</sup> 299.1054; found 299.1054.

**(E)-7a-hydroxy-4a-methyl-3-(4-(trifluoromethyl)benzylidene)hexahydrocyclopenta[b]pyran-5(2H)-one (7g)**

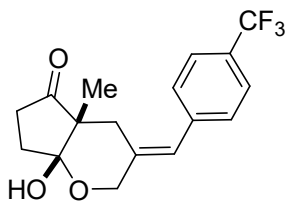

Chemical Formula: C<sub>17</sub>H<sub>17</sub>F<sub>3</sub>O<sub>3</sub>

Exact Mass: 326.1130

**7g** was prepared according to general procedure 2.2 using **6g** (58.8 mg, 0.2 mmol) and was purified by silica gel column chromatography (PE/EtOAc = 6/1) to obtain **7g** as colorless oil (35.2 mg, 54% yield).

<sup>1</sup>H NMR (600 MHz, CDCl<sub>3</sub>) δ 7.63 - 7.59 (m, 2H), 7.48 - 7.45 (m, 2H), 6.35 (s, 1H), 4.57 (dt, *J* = 12.3, 1.5 Hz, 1H), 3.90 (dd, *J* = 12.3, 2.0 Hz, 1H), 3.12 (dd, *J* = 14.6, 2.0 Hz, 1H), 2.63 (bs, 1H), 2.48 - 2.40 (m, 2H), 2.21 - 2.12 (m, 3H), 1.05 (s, 3H);

<sup>13</sup>C NMR (151 MHz, CDCl<sub>3</sub>) δ 216.4, 140.0, 134.9, 129.1, 128.8 (q, *J* = 31.7 Hz), 125.2 (q, *J* = 3.8 Hz), 124.3 (q, *J* = 273.3 Hz), 124.4, 103.1, 66.4, 53.2, 35.1, 32.8, 29.7, 20.7;

<sup>19</sup>F NMR (376 MHz, CDCl<sub>3</sub>) δ - 62.32;

HRMS: (ESI) calcd for C<sub>17</sub>H<sub>18</sub>F<sub>3</sub>O<sub>3</sub><sup>+</sup> [M+H]<sup>+</sup> 327.1203; found 327.1213.

**(E)-7a-hydroxy-4a-methyl-3-(3-methylbenzylidene)hexahydrocyclopenta[b]pyran-5(2H)-one (7h)**

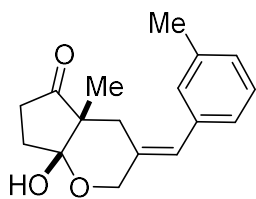

Chemical Formula: C<sub>17</sub>H<sub>20</sub>O<sub>3</sub>

Exact Mass: 272.1412

**7h** was prepared according to general procedure 2.2 using **6h** (48.1 mg, 0.2 mmol) and was purified by silica gel column chromatography (PE/EtOAc = 6/1) to obtain **7h** as colorless oil (40.3 mg, 74% yield).

<sup>1</sup>H NMR (400 MHz, CDCl<sub>3</sub>) δ 7.29 - 7.20 (m, 1H), 7.21 - 7.11 (m, 2H), 7.09 - 7.03 (m, 1H), 6.32 (s, 1H), 4.56 (dt, *J* = 12.3, 1.6 Hz, 1H), 3.89 (dd, *J* = 12.2, 2.0 Hz, 1H), 3.19 (dd, *J* = 14.7, 2.0 Hz, 1H), 2.86 (bs, 1H), 2.48 - 2.38 (m, 2H), 2.37 (s, 3H), 2.22 - 2.09 (m, 3H), 1.05 (s, 3H);



$^{13}\text{C}$  NMR (151 MHz,  $\text{CDCl}_3$ )  $\delta$  216.5, 137.7, 136.2, 132.4, 129.5, 128.1, 127.6, 125.8, 125.7, 103.1, 66.6, 53.0, 35.1, 32.8, 29.8, 21.4, 20.6;

HRMS: (ESI) calcd for  $\text{C}_{17}\text{H}_{20}\text{O}_3\text{Na}^+[\text{M}+\text{Na}]^+$  295.1305; found 295.1306.

**(*E*)-7a-hydroxy-4a-methyl-3-(3-(trifluoromethoxy)benzylidene)hexahydrocyclopenta[*b*]pyran-5(2*H*)-one (7i)**

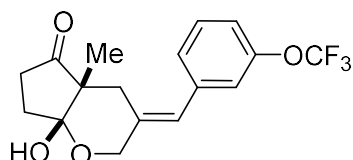

Chemical Formula:  $\text{C}_{17}\text{H}_{17}\text{F}_3\text{O}_4$

Exact Mass: 342.1079

**7i** was prepared according to general procedure 2.2 using **6i** (62 mg, 0.2 mmol) and was purified by silica gel column chromatography (PE/EtOAc = 6/1) to obtain **7i** as colorless oil (41.1 mg, 60% yield).

$^1\text{H}$  NMR (600 MHz,  $\text{CDCl}_3$ )  $\delta$  7.40 - 7.35 (m, 1H), 7.32 - 7.30 (m, 1H), 7.23 (s, 1H), 7.12 - 7.08 (m, 1H), 6.31 (s, 1H), 4.56 (dt,  $J = 12.3, 1.5$  Hz, 1H), 3.89 (dd,  $J = 12.4, 2.1$  Hz, 1H), 3.12 (dd,  $J = 14.6, 2.1$  Hz, 1H), 2.59 (bs, 1H), 2.48 - 2.40 (m, 2H), 2.22 - 2.11 (m, 3H), 1.06 (s, 3H);

$^{13}\text{C}$  NMR (151 MHz,  $\text{CDCl}_3$ )  $\delta$  216.3, 149.2, 138.3, 134.3, 129.6, 127.2, 124.2, 121.3, 120.5 (q,  $J = 257.3$  Hz), 119.2, 103.0, 66.4, 53.1, 35.0, 32.8, 29.6, 20.6;

$^{19}\text{F}$  NMR (376 MHz,  $\text{CDCl}_3$ )  $\delta$  - 57.58;

HRMS: (ESI) calcd for  $\text{C}_{17}\text{H}_{17}\text{F}_3\text{O}_4\text{Na}^+[\text{M}+\text{Na}]^+$  365.0971; found 365.0985.

**(*E*)-7a-hydroxy-4a-methyl-3-(2-methylbenzylidene)hexahydrocyclopenta[*b*]pyran-5(2*H*)-one (7j)**

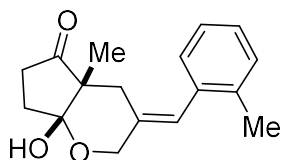

Chemical Formula:  $\text{C}_{17}\text{H}_{20}\text{O}_3$

Exact Mass: 272.1412

**7j** was prepared according to general procedure 2.2 using **6j** (48.1 mg, 0.2 mmol) and was

purified by silica gel column chromatography (PE/EtOAc = 6/1) to obtain **7j** as colorless oil (30.5 mg, 56% yield).

$^1\text{H}$  NMR (400 MHz,  $\text{CDCl}_3$ )  $\delta$  7.29 - 7.24 (m, 1H), 7.23 - 7.14 (m, 3H), 6.32 (s, 1H), 4.57 (d,  $J$  = 12.2 Hz, 1H), 3.95 (d,  $J$  = 12.2 Hz, 1H), 2.89 (d,  $J$  = 14.5 Hz, 1H), 2.61 (bs, 1H), 2.47 - 2.38 (m, 2H), 2.19 - 2.05 (m, 6H), 0.99 (s, 3H);

$^{13}\text{C}$  NMR (151 MHz,  $\text{CDCl}_3$ )  $\delta$  216.0, 136.5, 135.4, 132.6, 129.7, 129.1, 127.2, 125.5, 124.9, 103.1, 66.3, 53.0, 35.1, 32.8, 29.8, 20.5, 19.8;

HRMS: (ESI) calcd for  $\text{C}_{17}\text{H}_{20}\text{O}_3\text{Na}^+$   $[\text{M}+\text{Na}]^+$  295.1305; found 295.1302.

**(E)-7a-hydroxy-4a-methyl-3-(naphthalen-2-ylmethylene)hexahydrocyclopenta[b]pyran-5(2H)-one (7k)**

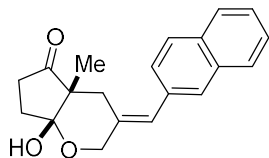

Chemical Formula:  $\text{C}_{20}\text{H}_{20}\text{O}_3$   
Exact Mass: 308.1412

**7k** was prepared according to general procedure 2.2 using **6k** (55.2 mg, 0.2 mmol) and was purified by silica gel column chromatography (PE/EtOAc = 6/1) to obtain **7k** as colorless oil (37.6 mg, 61% yield).

$^1\text{H}$  NMR (400 MHz,  $\text{CDCl}_3$ )  $\delta$  7.91 - 7.78 (m, 4H), 7.54 - 7.41 (m, 3H), 6.50 (s, 1H), 4.61 (dt,  $J$  = 12.1, 1.6 Hz, 1H), 3.96 (dd,  $J$  = 12.3, 2.1 Hz, 1H), 3.28 (dd,  $J$  = 14.5, 2.1 Hz, 1H), 2.88 (bs, 1H), 2.50 - 2.40 (m, 2H), 2.29 - 2.09 (m, 3H), 1.06 (s, 3H);

$^{13}\text{C}$  NMR (151 MHz,  $\text{CDCl}_3$ )  $\delta$  216.5, 133.8, 133.3, 133.1, 132.3, 128.0, 127.7, 127.64, 127.57, 127.1, 125.9, 125.72, 125.67, 103.1, 66.6, 53.1, 35.1, 32.8, 29.8, 20.7;

HRMS: (ESI) calcd for  $\text{C}_{20}\text{H}_{20}\text{O}_3\text{Na}^+$   $[\text{M}+\text{Na}]^+$  331.1305; found 331.1302.

**(E)-3-(benzo[d][1,3]dioxol-5-ylmethylene)-7a-hydroxy-4a-methylhexahydrocyclopenta[b]pyran-5(2H)-one (7l)**

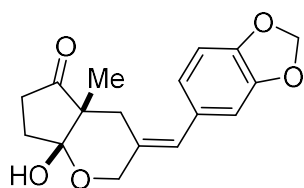

Chemical Formula: C<sub>17</sub>H<sub>18</sub>O<sub>5</sub>

Exact Mass: 302.1154

**7l** was prepared according to general procedure 2.2 using **6l** (54 mg, 0.2 mmol) and was purified by silica gel column chromatography (PE/EtOAc = 6/1) to obtain **7l** as colorless oil (46.0 mg, 76% yield).

<sup>1</sup>H NMR (400 MHz, CDCl<sub>3</sub>) δ 6.88 (s, 1H), 6.83 - 6.76 (m, 2H), 6.25 (s, 1H), 5.98 - 5.93 (m, 2H), 4.53 (dd, *J* = 12.2, 1.6 Hz, 1H), 3.86 (dd, *J* = 12.3, 2.0 Hz, 1H), 3.17 (dd, *J* = 14.5, 2.0 Hz, 1H), 2.68 (bs, 1H), 2.47 - 2.38 (m, 2H), 2.21 - 2.07 (m, 3H), 1.05 (s, 3H);

<sup>13</sup>C NMR (151 MHz, CDCl<sub>3</sub>) δ 216.5, 147.4, 146.3, 131.7, 130.3, 125.3, 122.6, 109.1, 108.2, 103.1, 100.9, 66.6, 53.0, 35.1, 32.8, 29.7, 20.6;

HRMS: (ESI) calcd for C<sub>17</sub>H<sub>18</sub>O<sub>5</sub>Na<sup>+</sup> [M+Na]<sup>+</sup> 325.1046; found 325.1057.

**(E)-3-((2,3-dihydrobenzo[*b*][1,4]dioxin-6-yl)methylene)-7a-hydroxy-4a-methylhexahydrocyclopenta[*b*]pyran-5(2H)-one (7m)**

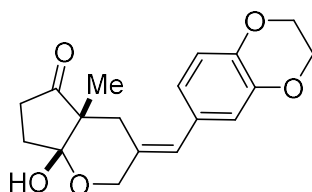

Chemical Formula: C<sub>18</sub>H<sub>20</sub>O<sub>5</sub>

Exact Mass: 316.1311

**7m** was prepared according to general procedure 2.2 using **6m** (56.8 mg, 0.2 mmol) and was purified by silica gel column chromatography (PE/EtOAc = 6/1) to obtain **7m** as colorless oil (41.7 mg, 66% yield).

<sup>1</sup>H NMR (400 MHz, CDCl<sub>3</sub>) δ 6.91 - 6.87 (m, 1H), 6.85 - 6.81 (m, 2H), 6.21 (s, 1H), 4.53 (dt, *J* = 12.3, 1.5 Hz, 1H), 4.25 (s, 4H), 3.85 (dd, *J* = 12.3, 1.9 Hz, 1H), 3.20 (dd, *J* = 14.6, 1.9 Hz, 1H), 3.04 (bs, 1H), 2.45 - 2.36 (m, 2H), 2.21 - 2.08 (m, 3H), 1.04 (s, 3H);

<sup>13</sup>C NMR (151 MHz, CDCl<sub>3</sub>) δ 216.5, 143.1, 142.5, 131.6, 129.8, 125.0, 122.2, 117.6, 117.0, 103.1, 66.6, 64.4, 64.3, 52.9, 35.1, 32.8, 29.8, 20.6;

HRMS: (ESI) calcd for  $C_{18}H_{20}O_5Na^+[M+Na]^+$  339.1203; found 339.1193.

**(E)-7a-hydroxy-4a-methyl-3-(thiophen-3-ylmethylene)hexahydrocyclopenta[b]pyran-5(2H)-one (7n)**

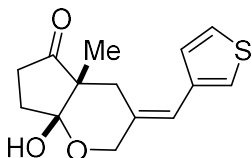

Chemical Formula:  $C_{14}H_{16}O_3S$   
Exact Mass: 264.0820

**7n** was prepared according to general procedure 2.2 using **6n** (46.4 mg, 0.2 mmol) and was purified by silica gel column chromatography (PE/EtOAc = 6/1) to obtain **7n** as colorless oil (35.4 mg, 67% yield).

$^1H$  NMR (400 MHz,  $CDCl_3$ )  $\delta$  7.41 - 7.35 (m, 1H), 7.32 - 7.27 (m, 1H), 7.20 - 7.15 (m, 1H), 6.26 (s, 1H), 4.53 (dt,  $J = 12.2, 1.5$  Hz, 1H), 3.86 (dd,  $J = 12.1, 2.1$  Hz, 1H), 3.27 (dd,  $J = 14.5, 2.1$  Hz, 1H), 2.83 (bs, 1H), 2.49 - 2.37 (m, 2H), 2.25 - 2.06 (m, 3H), 1.08 (s, 3H);

$^{13}C$  NMR (151 MHz,  $CDCl_3$ )  $\delta$  216.8, 137.1, 132.2, 128.5, 125.1, 123.3, 119.9, 103.1, 66.6, 53.2, 35.1, 32.9, 30.2, 20.7;

HRMS: (ESI) calcd for  $C_{14}H_{17}O_3S^+[M+H]^+$  265.0893, found 265.0894.

**(E)-3-(dibenzo[b,d]furan-2-ylmethylene)-7a-hydroxy-4a-methylhexahydrocyclopenta[b]pyran-5(2H)-one (7o)**

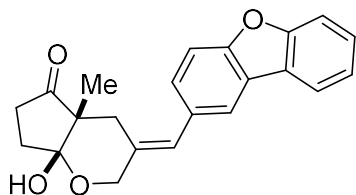

Chemical Formula:  $C_{22}H_{20}O_4$   
Exact Mass: 348.1362

**7o** was prepared according to general procedure 2.2 using **6o** (63.2 mg, 0.2 mmol) and was purified by silica gel column chromatography (PE/EtOAc = 6/1) to obtain **7o** as colorless oil (42.0 mg, 60% yield).

$^1H$  NMR (400 MHz,  $CDCl_3$ )  $\delta$  8.03 - 7.97 (m, 2H), 7.60 - 7.52 (m, 2H), 7.49 - 7.41 (m, 2H),

7.37 - 7.32 (m, 1H), 6.56 - 6.42 (m, 1H), 4.61 (dt,  $J = 12.2, 1.5$  Hz, 1H), 3.95 (dd,  $J = 12.2, 2.0$  Hz, 1H), 3.26 (dd,  $J = 14.5, 2.0$  Hz, 1H), 2.61 (bs, 1H), 2.53 - 2.41 (m, 2H), 2.28 - 2.04 (m, 3H), 1.07 (s, 3H);

$^{13}\text{C}$  NMR (151 MHz,  $\text{CDCl}_3$ )  $\delta$  216.6, 156.5, 155.1, 132.4, 131.1, 128.1, 127.1, 125.6, 124.3, 124.2, 122.7, 120.9, 120.8, 111.6, 111.3, 103.2, 66.7, 53.1, 35.2, 32.9, 29.7, 20.7;

HRMS: (ESI) calcd for  $\text{C}_{22}\text{H}_{21}\text{O}_4^+[\text{M}+\text{H}]^+$  349.1434; found 349.1428.

**(*E*)-3-(dibenzo[*b,d*]thiophen-2-ylmethylene)-7a-hydroxy-4a-methylhexahydro-cyclopenta[*b*]pyran-5(2*H*)-one (7p)**

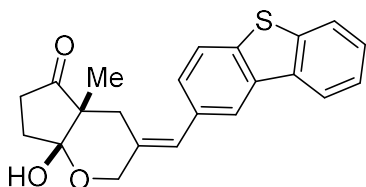

Chemical Formula:  $\text{C}_{22}\text{H}_{20}\text{O}_3\text{S}$

Exact Mass: 364.1133

**7p** was prepared according to general procedure 2.2 using **6p** (66.4 mg, 0.2 mmol) and was purified by silica gel column chromatography (PE/EtOAc = 6/1) to obtain **7p** as colorless oil (54.6 mg, 75% yield).

$^1\text{H}$  NMR (400 MHz,  $\text{CDCl}_3$ )  $\delta$  8.33 - 8.28 (m, 2H), 7.87 - 7.81 (m, 2H), 7.49 - 7.44 (m, 2H), 7.43 - 7.39 (m, 1H), 6.53 (s, 1H), 4.62 (dt,  $J = 12.1, 1.5$  Hz, 1H), 3.97 (dd,  $J = 12.3, 2.0$  Hz, 1H), 3.31 (dd,  $J = 14.5, 2.1$  Hz, 1H), 2.55 - 2.38 (m, 3H), 2.25 - 2.14 (m, 3H), 1.08 (s, 3H);

$^{13}\text{C}$  NMR (151 MHz,  $\text{CDCl}_3$ )  $\delta$  216.7, 139.7, 137.8, 135.74, 135.68, 132.9, 132.7, 127.5, 126.7, 125.5, 124.4, 122.7, 122.5, 121.95, 121.91, 103.2, 66.8, 53.2, 35.2, 33.0, 29.7, 20.8;

HRMS: (ESI) calcd for  $\text{C}_{22}\text{H}_{20}\text{O}_3\text{SNa}^+[\text{M}+\text{Na}]^+$  387.1025; found 387.1020.

**(*E*)-7a-hydroxy-4a-methyl-3-((1-methyl-1*H*-indol-5-yl)methylene)hexahydrocyclopenta[*b*]pyran-5(2*H*)-one (7q)**

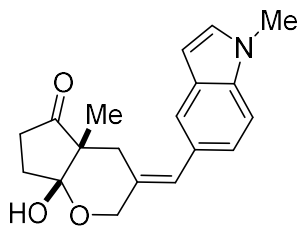

Chemical Formula: C<sub>19</sub>H<sub>21</sub>NO<sub>3</sub>  
Exact Mass: 311.1521

**7q** was prepared according to general procedure 2.2 using **6q** (55.8 mg, 0.2 mmol) and was purified by silica gel column chromatography (PE/EtOAc = 6/1) to obtain **7q** as colorless oil (34.8 mg, 56% yield).

<sup>1</sup>H NMR (400 MHz, CDCl<sub>3</sub>) δ 7.61 (s, 1H), 7.31 (d, *J* = 8.5 Hz, 1H), 7.24 (d, *J* = 8.5 Hz, 1H), 7.04 (d, *J* = 3.1 Hz, 1H), 6.50 (d, *J* = 2.8 Hz, 2H), 4.60 (d, *J* = 12.2 Hz, 1H), 3.95 (d, *J* = 12.1 Hz, 1H), 3.84 - 3.45 (m, 3H), 3.29 (d, *J* = 14.5 Hz, 1H), 2.87 (bs, 1H), 2.51 - 2.38 (m, 2H), 2.28 - 1.96 (m, 3H), 1.05 (s, 3H);

<sup>13</sup>C NMR (151 MHz, CDCl<sub>3</sub>) δ 216.6, 135.7, 130.4, 129.0, 128.4, 127.5, 126.8, 122.9, 121.1, 108.9, 103.2, 101.1, 66.8, 52.9, 35.1, 32.83, 32.82, 29.9, 20.6;

HRMS: (ESI) calcd for C<sub>19</sub>H<sub>22</sub>NO<sub>3</sub><sup>+</sup>[M+H]<sup>+</sup> 312.1594, found 312.1594.

**(E)-7a-hydroxy-3-((6-methoxypyridin-3-yl)methylene)-4a-methylhexahydrocyclopenta[b]pyran-5(2H)-one (7r)**

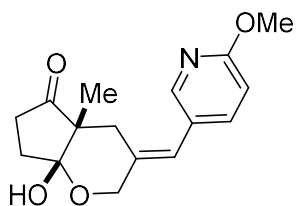

Chemical Formula: C<sub>16</sub>H<sub>19</sub>NO<sub>4</sub>  
Exact Mass: 289.1314

**7r** was prepared according to general procedure 2.2 using **6r** (51.4 mg, 0.2 mmol) and was purified by silica gel column chromatography (PE/EtOAc = 6/1) to obtain **7r** as colorless oil (40.5 mg, 70% yield).

<sup>1</sup>H NMR (400 MHz, CDCl<sub>3</sub>) δ 8.10 (s, 1H), 7.71 - 7.60 (m, 1H), 6.79 - 6.71 (m, 1H), 6.21 (s, 1H), 4.55 (d, *J* = 12.2 Hz, 1H), 3.94 (s, 3H), 3.87 (dd, *J* = 12.3, 2.0 Hz, 1H), 3.20 (bs, 1H), 3.09 (d, *J* = 14.4 Hz, 1H), 2.45 - 2.35 (m, 2H), 2.22 - 2.07 (m, 3H), 1.04 (s, 3H);

$^{13}\text{C}$  NMR (151 MHz,  $\text{CDCl}_3$ )  $\delta$  216.5, 162.8, 146.8, 139.2, 133.5, 125.4, 121.7, 110.4, 103.0, 66.3, 53.5, 53.1, 35.0, 32.8, 29.7, 20.6;

HRMS: (ESI) calcd for  $\text{C}_{16}\text{H}_{20}\text{NO}_4^+$   $[\text{M}+\text{H}]^+$  290.1387; found 290.1397.

**(E)-7a-hydroxy-4a-methyl-3-(((8R,9S,13S,14S)-13-methyl-17-oxo-7,8,9,11,12,13,14,15,16,17-decahydro-6H-cyclopenta[*a*]phenanthren-3-yl)methylene)hexahydrocyclopenta[*b*]pyran-5(2H)-one (7s)**

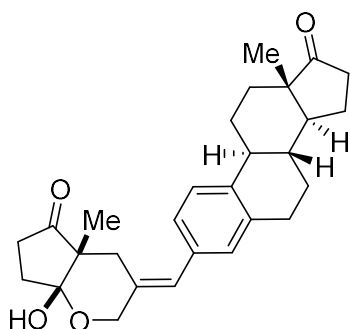

Chemical Formula:  $\text{C}_{28}\text{H}_{34}\text{O}_4$

Exact Mass: 434.2457

**7s** was prepared according to general procedure 2.2 using **6s** (80.4 mg, 0.2 mmol) and was purified by silica gel column chromatography (PE/EtOAc = 6/1) to obtain **7s** as colorless oil (56.5 mg, 65% yield).

$^1\text{H}$  NMR (600 MHz,  $\text{CDCl}_3$ )  $\delta$  7.29 - 7.26 (m, 1H), 7.19 - 7.13 (m, 1H), 7.09 - 7.04 (m, 1H), 6.28 (s, 1H), 4.56 (d,  $J = 12.2$  Hz, 1H), 3.88 (d,  $J = 12.0$  Hz, 1H), 3.20 (d,  $J = 14.6$  Hz, 1H), 3.05 (s, 1H), 2.96 - 2.91 (m, 2H), 2.51 (dd,  $J = 19.1, 8.6$  Hz, 1H), 2.45 - 2.40 (m, 3H), 2.33 - 2.28 (m, 1H), 2.20 - 2.11 (m, 4H), 2.07 - 1.96 (m, 3H), 1.65 - 1.59 (m, 2H), 1.56 - 1.45 (m, 4H), 1.05 (s, 3H), 0.92 (s, 3H);

$^{13}\text{C}$  NMR (101 MHz,  $\text{CDCl}_3$ )  $\delta$  221.2, 216.7, 216.6, 138.28, 138.27, 136.2, 133.8, 132.2, 132.1, 129.40, 129.38, 126.23, 126.17, 125.3, 125.2, 103.0, 66.5, 52.94, 52.92, 50.5, 48.0, 44.4, 44.3, 38.08, 38.06, 35.8, 35.1, 32.8, 31.5, 29.8, 29.35, 29.33, 26.5, 25.60, 25.58, 21.6, 20.7, 13.8;

HRMS: (ESI) calcd for  $\text{C}_{28}\text{H}_{35}\text{O}_4^+$   $[\text{M}+\text{H}]^+$  435.2530; found 435.2546.

**(E)-3-benzylidene-4a-ethyl-7a-hydroxyhexahydrocyclopenta[*b*]pyran-5(2H)-one (7t)**

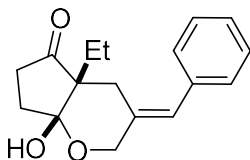

Chemical Formula: C<sub>17</sub>H<sub>20</sub>O<sub>3</sub>

Exact Mass: 272.1412

**7t** was prepared according to general procedure 2.2 using **6t** (48 mg, 0.2 mmol) and was purified by silica gel column chromatography (PE/EtOAc = 6/1) to obtain **7t** as colorless oil (28.3 mg, 52% yield).

<sup>1</sup>H NMR (400 MHz, CDCl<sub>3</sub>) δ 7.41 - 7.33 (m, 4H), 7.26 - 7.21 (m, 1H), 6.35 (s, 1H), 4.55 (dt, *J* = 12.2, 1.6 Hz, 1H), 3.89 (dd, *J* = 12.3, 2.0 Hz, 1H), 3.32 (d, *J* = 15.1 Hz, 1H), 2.42 - 2.37 (m, 2H), 2.29 - 2.20 (m, 1H), 2.13 - 2.01 (m, 2H), 1.73 - 1.64 (m, 1H), 1.58 - 1.51 (m, 2H), 0.79 (t, *J* = 7.5 Hz, 3H);

<sup>13</sup>C NMR (151 MHz, CDCl<sub>3</sub>) δ 214.9, 136.4, 132.5, 128.8, 128.2, 126.7, 125.6, 103.3, 66.4, 56.2, 35.2, 33.1, 26.6, 26.4, 7.4;

HRMS: (ESI) calcd for C<sub>17</sub>H<sub>20</sub>O<sub>3</sub>Na<sup>+</sup> [M+Na]<sup>+</sup> 295.1305; found 295.1302.

**(E)-4a-benzyl-3-benzylidene-7a-hydroxyhexahydrocyclopenta[b]pyran-5(2H)-one (7u)**

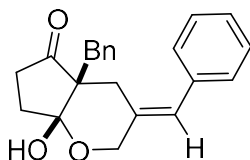

Chemical Formula: C<sub>22</sub>H<sub>22</sub>O<sub>3</sub>

Exact Mass: 334.1569

**7u** was prepared according to general procedure 2.2 using **6u** (60.4 mg, 0.2 mmol) and was purified by silica gel column chromatography (PE/EtOAc = 6/1) to obtain **7u** as colorless oil (30.1 mg, 45% yield).

<sup>1</sup>H NMR (600 MHz, CDCl<sub>3</sub>) δ 7.35 - 7.29 (m, 4H), 7.25 - 7.18 (m, 4H), 7.14 - 7.09 (m, 2H), 6.33 (s, 1H), 4.56 (dd, *J* = 12.1, 1.5 Hz, 1H), 3.88 (dd, *J* = 12.2, 2.0 Hz, 1H), 3.20 (dd, *J* = 14.6, 2.0 Hz, 1H), 2.94 (d, *J* = 13.5 Hz, 1H), 2.80 (d, *J* = 13.6 Hz, 1H), 2.72 (bs, 1H), 2.38 - 2.27 (m, 1H), 2.27 - 2.19 (m, 1H), 2.13 - 2.05 (m, 1H), 1.99 - 1.92 (m, 1H), 1.77 - 1.68 (m, 1H);

<sup>13</sup>C NMR (151 MHz, CDCl<sub>3</sub>) δ 216.4, 136.2, 132.3, 130.4, 128.8, 128.2, 128.0, 126.9, 126.8,



125.5, 103.1, 66.2, 57.8, 41.6, 36.3, 33.3, 29.7;

HRMS: (ESI) calcd for  $C_{22}H_{23}O_3^+$   $[M+H]^+$  335.1642; found 335.1643.

**(E)-3-benzylidene-7a-hydroxy-4a-(3-phenylprop-2-yn-1-yl)hexahydrocyclopenta[*b*]pyran-5(2*H*)-one (7v)**

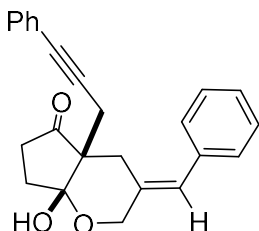

Chemical Formula:  $C_{24}H_{22}O_3$   
Exact Mass: 358.1569

**7v** was prepared according to general procedure 2.2 using **6v** (65.2 mg, 0.2 mmol) and was purified by silica gel column chromatography (PE/EtOAc = 6/1) to obtain **7v** as colorless oil (22.2 mg, 31% yield).

$^1H$  NMR (600 MHz,  $CDCl_3$ )  $\delta$  7.42 - 7.39 (m, 2H), 7.37 - 7.33 (m, 4H), 7.30 - 7.27 (m, 3H), 7.26 - 7.22 (m, 1H), 6.39 (s, 1H), 4.56 (dt,  $J = 12.3, 1.5$  Hz, 1H), 3.93 (dd,  $J = 12.4, 2.0$  Hz, 1H), 3.44 (dd,  $J = 14.6, 2.0$  Hz, 1H), 2.95 (d,  $J = 2.8$  Hz, 1H), 2.67 (d,  $J = 17.1$  Hz, 1H), 2.58 (d,  $J = 17.1$  Hz, 1H), 2.51 - 2.44 (m, 3H), 2.29 - 2.25 (m, 1H), 2.23 - 2.19 (m, 1H);

$^{13}C$  NMR (151 MHz,  $CDCl_3$ )  $\delta$  214.2, 136.2, 132.0, 131.5, 128.8, 128.25, 128.22, 128.1, 126.9, 126.0, 102.8, 84.7, 83.6, 66.3, 55.2, 35.9, 33.6, 28.6, 25.1;

HRMS: (ESI) calcd for  $C_{24}H_{23}O_3^+$   $[M+H]^+$  359.1642; found 359.1636.

**(E)-3-benzylidene-7a-hydroxy-4a-(2-methylallyl)hexahydrocyclopenta[*b*]pyran-5(2*H*)-one (7w)**

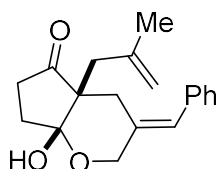

Chemical Formula:  $C_{19}H_{22}O_3$   
Exact Mass: 298.1569

**7w** was prepared according to general procedure 2.2 using **6w** (53.2 mg, 0.2 mmol) and was

purified by silica gel column chromatography (PE/EtOAc = 6/1) to obtain **7w** as colorless oil (25.2 mg, 42% yield).

$^1\text{H}$  NMR (600 MHz,  $\text{CD}_3\text{OD}$ )  $\delta$  7.41 - 7.35 (m, 2H), 7.34 - 7.29 (m, 2H), 7.23 - 7.18 (m, 1H), 6.31 (s, 1H), 4.80 (dd,  $J = 2.2, 1.4$  Hz, 1H), 4.66 (dd,  $J = 2.2, 1.0$  Hz, 1H), 4.55 (dt,  $J = 12.3, 1.6$  Hz, 1H), 3.82 (dd,  $J = 12.4, 2.0$  Hz, 1H), 3.26 (dd,  $J = 14.7, 2.0$  Hz, 1H), 2.47 - 2.40 (m, 1H), 2.35 (s, 2H), 2.31 - 2.24 (m, 2H), 2.14 - 2.03 (m, 2H), 1.62 (dd,  $J = 1.5, 0.9$  Hz, 3H);

$^{13}\text{C}$  NMR (151 MHz,  $\text{CD}_3\text{OD}$ )  $\delta$  218.2, 142.6, 138.1, 134.8, 129.9, 129.1, 127.6, 125.9, 116.0, 103.7, 66.7, 57.7, 43.2, 36.1, 33.0, 28.9, 24.1;

HRMS: (ESI) calcd for  $\text{C}_{19}\text{H}_{23}\text{O}_3^+$   $[\text{M}+\text{H}]^+$  299.1642; found 299.1656.

## 5. Crystallographic data for compound 7a

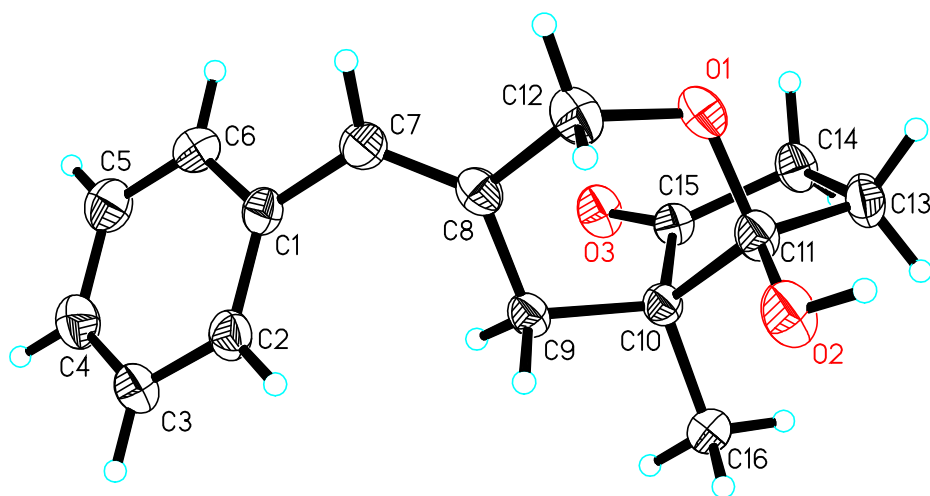

CCDC: 2058189

Table 1. Crystal data and structure refinement for **7a**.

|                                   |                                                |                 |
|-----------------------------------|------------------------------------------------|-----------------|
| Identification code               | cu_190522c_0m                                  |                 |
| Empirical formula                 | C <sub>16</sub> H <sub>18</sub> O <sub>3</sub> |                 |
| Formula weight                    | 258.30                                         |                 |
| Temperature                       | 296(2) K                                       |                 |
| Wavelength                        | 1.54178 Å                                      |                 |
| Crystal system                    | Monoclinic                                     |                 |
| Space group                       | P 1 2 <sub>1</sub> /c 1                        |                 |
| Unit cell dimensions              | a = 8.8774(4) Å                                | a = 90°.        |
|                                   | b = 11.4152(4) Å                               | b = 95.989(2)°. |
|                                   | c = 13.2381(5) Å                               | g = 90°.        |
| Volume                            | 1334.19(9) Å <sup>3</sup>                      |                 |
| Z                                 | 4                                              |                 |
| Density (calculated)              | 1.286 Mg/m <sup>3</sup>                        |                 |
| Absorption coefficient            | 0.708 mm <sup>-1</sup>                         |                 |
| F(000)                            | 552                                            |                 |
| Crystal size                      | 0.12 x 0.12 x 0.1 mm <sup>3</sup>              |                 |
| Theta range for data collection   | 5.009 to 64.990°.                              |                 |
| Index ranges                      | -8<=h<=9, -13<=k<=13, -13<=l<=15               |                 |
| Reflections collected             | 7918                                           |                 |
| Independent reflections           | 2166 [R(int) = 0.0279]                         |                 |
| Completeness to theta = 64.990°   | 95.5 %                                         |                 |
| Absorption correction             | Semi-empirical from equivalents                |                 |
| Max. and min. transmission        | 0.7533 and 0.6584                              |                 |
| Refinement method                 | Full-matrix least-squares on F <sup>2</sup>    |                 |
| Data / restraints / parameters    | 2166 / 0 / 175                                 |                 |
| Goodness-of-fit on F <sup>2</sup> | 1.037                                          |                 |
| Final R indices [I>2sigma(I)]     | R1 = 0.0329, wR2 = 0.0869                      |                 |
| R indices (all data)              | R1 = 0.0372, wR2 = 0.0901                      |                 |
| Extinction coefficient            | 0.0102(6)                                      |                 |
| Largest diff. peak and hole       | 0.193 and -0.126 e.Å <sup>-3</sup>             |                 |

Table 2. Atomic coordinates ( $\times 10^4$ ) and equivalent isotropic displacement parameters ( $\text{\AA}^2 \times 10^3$ ) for **7a**.  $U(\text{eq})$  is defined as one third of the trace of the orthogonalized  $U^{ij}$  tensor.

|       | x       | y       | z       | U(eq) |
|-------|---------|---------|---------|-------|
| C(1)  | 3779(2) | 6875(1) | 766(1)  | 42(1) |
| C(2)  | 2685(2) | 7610(1) | 1101(1) | 45(1) |
| C(3)  | 2245(2) | 8620(1) | 579(1)  | 50(1) |
| C(4)  | 2869(2) | 8917(1) | -296(1) | 56(1) |
| C(5)  | 3955(2) | 8196(2) | -644(1) | 61(1) |
| C(6)  | 4411(2) | 7194(1) | -115(1) | 53(1) |
| C(7)  | 4316(2) | 5823(1) | 1344(1) | 45(1) |
| C(8)  | 3481(2) | 5042(1) | 1779(1) | 39(1) |
| C(9)  | 1785(1) | 5004(1) | 1663(1) | 37(1) |
| C(10) | 1163(2) | 3757(1) | 1539(1) | 35(1) |
| C(11) | 1973(2) | 2893(1) | 2308(1) | 41(1) |
| C(12) | 4207(2) | 4107(1) | 2464(1) | 50(1) |
| C(13) | 1572(2) | 1684(1) | 1876(1) | 49(1) |
| C(14) | 1625(2) | 1848(1) | 737(1)  | 45(1) |
| C(15) | 1463(2) | 3154(1) | 556(1)  | 36(1) |
| C(16) | -562(2) | 3765(1) | 1570(1) | 50(1) |
| O(1)  | 3561(1) | 2971(1) | 2251(1) | 45(1) |
| O(2)  | 1585(2) | 3131(1) | 3281(1) | 63(1) |
| O(3)  | 1551(1) | 3637(1) | -249(1) | 50(1) |

Table 3. Bond lengths [Å] and angles [°] for **7a**.

---

|              |            |
|--------------|------------|
| C(1)-C(2)    | 1.391(2)   |
| C(1)-C(6)    | 1.395(2)   |
| C(1)-C(7)    | 1.475(2)   |
| C(2)-H(2A)   | 0.9300     |
| C(2)-C(3)    | 1.380(2)   |
| C(3)-H(3)    | 0.9300     |
| C(3)-C(4)    | 1.377(2)   |
| C(4)-H(4)    | 0.9300     |
| C(4)-C(5)    | 1.383(2)   |
| C(5)-H(5)    | 0.9300     |
| C(5)-C(6)    | 1.380(2)   |
| C(6)-H(6)    | 0.9300     |
| C(7)-H(7)    | 0.9300     |
| C(7)-C(8)    | 1.3288(19) |
| C(8)-C(9)    | 1.4986(19) |
| C(8)-C(12)   | 1.5019(19) |
| C(9)-H(9A)   | 0.9700     |
| C(9)-H(9B)   | 0.9700     |
| C(9)-C(10)   | 1.5284(17) |
| C(10)-C(11)  | 1.5405(18) |
| C(10)-C(15)  | 1.5206(17) |
| C(10)-C(16)  | 1.5357(19) |
| C(11)-C(13)  | 1.522(2)   |
| C(11)-O(1)   | 1.4228(17) |
| C(11)-O(2)   | 1.3947(16) |
| C(12)-H(12A) | 0.9700     |
| C(12)-H(12B) | 0.9700     |
| C(12)-O(1)   | 1.4339(17) |
| C(13)-H(13A) | 0.9700     |
| C(13)-H(13B) | 0.9700     |
| C(13)-C(14)  | 1.526(2)   |
| C(14)-H(14A) | 0.9700     |
| C(14)-H(14B) | 0.9700     |
| C(14)-C(15)  | 1.5148(18) |
| C(15)-O(3)   | 1.2097(15) |
| C(16)-H(16A) | 0.9600     |

|                   |            |
|-------------------|------------|
| C(16)-H(16B)      | 0.9600     |
| C(16)-H(16C)      | 0.9600     |
| O(2)-H(2)         | 0.8200     |
| C(2)-C(1)-C(6)    | 117.65(13) |
| C(2)-C(1)-C(7)    | 121.65(13) |
| C(6)-C(1)-C(7)    | 120.64(13) |
| C(1)-C(2)-H(2A)   | 119.5      |
| C(3)-C(2)-C(1)    | 121.02(14) |
| C(3)-C(2)-H(2A)   | 119.5      |
| C(2)-C(3)-H(3)    | 119.7      |
| C(4)-C(3)-C(2)    | 120.61(15) |
| C(4)-C(3)-H(3)    | 119.7      |
| C(3)-C(4)-H(4)    | 120.3      |
| C(3)-C(4)-C(5)    | 119.33(15) |
| C(5)-C(4)-H(4)    | 120.3      |
| C(4)-C(5)-H(5)    | 119.9      |
| C(6)-C(5)-C(4)    | 120.13(15) |
| C(6)-C(5)-H(5)    | 119.9      |
| C(1)-C(6)-H(6)    | 119.4      |
| C(5)-C(6)-C(1)    | 121.26(15) |
| C(5)-C(6)-H(6)    | 119.4      |
| C(1)-C(7)-H(7)    | 116.4      |
| C(8)-C(7)-C(1)    | 127.29(13) |
| C(8)-C(7)-H(7)    | 116.4      |
| C(7)-C(8)-C(9)    | 125.14(12) |
| C(7)-C(8)-C(12)   | 121.02(13) |
| C(9)-C(8)-C(12)   | 113.83(12) |
| C(8)-C(9)-H(9A)   | 109.0      |
| C(8)-C(9)-H(9B)   | 109.0      |
| C(8)-C(9)-C(10)   | 112.73(10) |
| H(9A)-C(9)-H(9B)  | 107.8      |
| C(10)-C(9)-H(9A)  | 109.0      |
| C(10)-C(9)-H(9B)  | 109.0      |
| C(9)-C(10)-C(11)  | 112.77(11) |
| C(9)-C(10)-C(16)  | 110.01(10) |
| C(15)-C(10)-C(9)  | 114.80(10) |
| C(15)-C(10)-C(11) | 99.42(10)  |
| C(15)-C(10)-C(16) | 106.81(11) |

|                     |            |
|---------------------|------------|
| C(16)-C(10)-C(11)   | 112.57(11) |
| C(13)-C(11)-C(10)   | 104.97(11) |
| O(1)-C(11)-C(10)    | 108.76(10) |
| O(1)-C(11)-C(13)    | 103.36(11) |
| O(2)-C(11)-C(10)    | 110.03(11) |
| O(2)-C(11)-C(13)    | 116.94(12) |
| O(2)-C(11)-O(1)     | 112.22(11) |
| C(8)-C(12)-H(12A)   | 109.1      |
| C(8)-C(12)-H(12B)   | 109.1      |
| H(12A)-C(12)-H(12B) | 107.8      |
| O(1)-C(12)-C(8)     | 112.70(11) |
| O(1)-C(12)-H(12A)   | 109.1      |
| O(1)-C(12)-H(12B)   | 109.1      |
| C(11)-C(13)-H(13A)  | 111.1      |
| C(11)-C(13)-H(13B)  | 111.1      |
| C(11)-C(13)-C(14)   | 103.32(10) |
| H(13A)-C(13)-H(13B) | 109.1      |
| C(14)-C(13)-H(13A)  | 111.1      |
| C(14)-C(13)-H(13B)  | 111.1      |
| C(13)-C(14)-H(14A)  | 110.7      |
| C(13)-C(14)-H(14B)  | 110.7      |
| H(14A)-C(14)-H(14B) | 108.8      |
| C(15)-C(14)-C(13)   | 105.31(11) |
| C(15)-C(14)-H(14A)  | 110.7      |
| C(15)-C(14)-H(14B)  | 110.7      |
| C(14)-C(15)-C(10)   | 109.48(10) |
| O(3)-C(15)-C(10)    | 125.50(11) |
| O(3)-C(15)-C(14)    | 125.02(12) |
| C(10)-C(16)-H(16A)  | 109.5      |
| C(10)-C(16)-H(16B)  | 109.5      |
| C(10)-C(16)-H(16C)  | 109.5      |
| H(16A)-C(16)-H(16B) | 109.5      |
| H(16A)-C(16)-H(16C) | 109.5      |
| H(16B)-C(16)-H(16C) | 109.5      |
| C(11)-O(1)-C(12)    | 115.12(11) |
| C(11)-O(2)-H(2)     | 109.5      |

---

Symmetry transformations used to generate equivalent atoms:



Table 4. Anisotropic displacement parameters ( $\text{\AA}^2 \times 10^3$ ) for **7a**. The anisotropic displacement

factor exponent takes the form:  $-2p^2[ h^2 a^*2U^{11} + \dots + 2 h k a^* b^* U^{12} ]$

|       | U <sup>11</sup> | U <sup>22</sup> | U <sup>33</sup> | U <sup>23</sup> | U <sup>13</sup> | U <sup>12</sup> |
|-------|-----------------|-----------------|-----------------|-----------------|-----------------|-----------------|
| C(1)  | 40(1)           | 36(1)           | 50(1)           | -4(1)           | 2(1)            | -8(1)           |
| C(2)  | 54(1)           | 37(1)           | 46(1)           | -5(1)           | 10(1)           | -6(1)           |
| C(3)  | 56(1)           | 38(1)           | 58(1)           | -5(1)           | 7(1)            | 1(1)            |
| C(4)  | 65(1)           | 43(1)           | 60(1)           | 9(1)            | 5(1)            | -2(1)           |
| C(5)  | 66(1)           | 58(1)           | 60(1)           | 12(1)           | 19(1)           | -6(1)           |
| C(6)  | 46(1)           | 52(1)           | 65(1)           | 2(1)            | 17(1)           | -2(1)           |
| C(7)  | 38(1)           | 42(1)           | 54(1)           | -4(1)           | -1(1)           | -2(1)           |
| C(8)  | 45(1)           | 35(1)           | 37(1)           | -6(1)           | -2(1)           | 2(1)            |
| C(9)  | 46(1)           | 31(1)           | 33(1)           | -1(1)           | 7(1)            | 4(1)            |
| C(10) | 42(1)           | 33(1)           | 31(1)           | 3(1)            | 9(1)            | 2(1)            |
| C(11) | 58(1)           | 38(1)           | 29(1)           | 5(1)            | 10(1)           | 4(1)            |
| C(12) | 56(1)           | 42(1)           | 47(1)           | -1(1)           | -10(1)          | 2(1)            |
| C(13) | 63(1)           | 34(1)           | 51(1)           | 9(1)            | 10(1)           | 0(1)            |
| C(14) | 57(1)           | 34(1)           | 45(1)           | -4(1)           | 3(1)            | -1(1)           |
| C(15) | 39(1)           | 36(1)           | 32(1)           | 0(1)            | 2(1)            | 0(1)            |
| C(16) | 48(1)           | 44(1)           | 59(1)           | 6(1)            | 18(1)           | 0(1)            |
| O(1)  | 54(1)           | 36(1)           | 42(1)           | 3(1)            | -4(1)           | 8(1)            |
| O(2)  | 105(1)          | 55(1)           | 32(1)           | 10(1)           | 22(1)           | 13(1)           |
| O(3)  | 75(1)           | 46(1)           | 30(1)           | 2(1)            | 8(1)            | 3(1)            |

Table 5. Hydrogen coordinates ( $\times 10^4$ ) and isotropic displacement parameters ( $\text{\AA}^2 \times 10^3$ ) for

7a.

|        | x     | y    | z     | U(eq) |
|--------|-------|------|-------|-------|
| H(2A)  | 2243  | 7418 | 1686  | 54    |
| H(3)   | 1520  | 9105 | 820   | 60    |
| H(4)   | 2564  | 9596 | -648  | 67    |
| H(5)   | 4378  | 8387 | -1237 | 73    |
| H(6)   | 5154  | 6723 | -351  | 64    |
| H(7)   | 5356  | 5693 | 1410  | 54    |
| H(9A)  | 1407  | 5463 | 1074  | 44    |
| H(9B)  | 1415  | 5359 | 2255  | 44    |
| H(12A) | 5282  | 4078 | 2389  | 60    |
| H(12B) | 4095  | 4311 | 3164  | 60    |
| H(13A) | 570   | 1447 | 2026  | 59    |
| H(13B) | 2304  | 1103 | 2147  | 59    |
| H(14A) | 2580  | 1567 | 532   | 54    |
| H(14B) | 804   | 1425 | 356   | 54    |
| H(16A) | -1012 | 4328 | 1092  | 74    |
| H(16B) | -790  | 3969 | 2241  | 74    |
| H(16C) | -961  | 3001 | 1397  | 74    |
| H(2)   | 1727  | 2544 | 3637  | 94    |

Table 6. Torsion angles [°] for **7a**.

---

|                         |             |
|-------------------------|-------------|
| C(1)-C(2)-C(3)-C(4)     | 0.8(2)      |
| C(1)-C(7)-C(8)-C(9)     | 7.6(2)      |
| C(1)-C(7)-C(8)-C(12)    | -171.39(13) |
| C(2)-C(1)-C(6)-C(5)     | -0.8(2)     |
| C(2)-C(1)-C(7)-C(8)     | 43.6(2)     |
| C(2)-C(3)-C(4)-C(5)     | -0.5(2)     |
| C(3)-C(4)-C(5)-C(6)     | -0.4(3)     |
| C(4)-C(5)-C(6)-C(1)     | 1.0(3)      |
| C(6)-C(1)-C(2)-C(3)     | -0.1(2)     |
| C(6)-C(1)-C(7)-C(8)     | -139.49(16) |
| C(7)-C(1)-C(2)-C(3)     | 176.90(12)  |
| C(7)-C(1)-C(6)-C(5)     | -177.83(14) |
| C(7)-C(8)-C(9)-C(10)    | 138.81(13)  |
| C(7)-C(8)-C(12)-O(1)    | -134.31(14) |
| C(8)-C(9)-C(10)-C(11)   | 45.77(14)   |
| C(8)-C(9)-C(10)-C(15)   | -67.16(14)  |
| C(8)-C(9)-C(10)-C(16)   | 172.35(11)  |
| C(8)-C(12)-O(1)-C(11)   | -57.23(16)  |
| C(9)-C(8)-C(12)-O(1)    | 46.62(17)   |
| C(9)-C(10)-C(11)-C(13)  | -163.01(11) |
| C(9)-C(10)-C(11)-O(1)   | -52.93(14)  |
| C(9)-C(10)-C(11)-O(2)   | 70.36(15)   |
| C(9)-C(10)-C(15)-C(14)  | 148.79(12)  |
| C(9)-C(10)-C(15)-O(3)   | -31.56(18)  |
| C(10)-C(11)-C(13)-C(14) | 39.02(14)   |
| C(10)-C(11)-O(1)-C(12)  | 59.42(13)   |
| C(11)-C(10)-C(15)-C(14) | 28.20(14)   |
| C(11)-C(10)-C(15)-O(3)  | -152.15(13) |
| C(11)-C(13)-C(14)-C(15) | -20.39(15)  |
| C(12)-C(8)-C(9)-C(10)   | -42.16(15)  |
| C(13)-C(11)-O(1)-C(12)  | 170.59(10)  |
| C(13)-C(14)-C(15)-C(10) | -5.40(16)   |
| C(13)-C(14)-C(15)-O(3)  | 174.95(13)  |
| C(15)-C(10)-C(11)-C(13) | -40.95(13)  |
| C(15)-C(10)-C(11)-O(1)  | 69.14(12)   |
| C(15)-C(10)-C(11)-O(2)  | -167.57(11) |

|                         |             |
|-------------------------|-------------|
| C(16)-C(10)-C(11)-C(13) | 71.79(14)   |
| C(16)-C(10)-C(11)-O(1)  | -178.13(10) |
| C(16)-C(10)-C(11)-O(2)  | -54.84(15)  |
| C(16)-C(10)-C(15)-C(14) | -88.97(13)  |
| C(16)-C(10)-C(15)-O(3)  | 90.69(15)   |
| O(1)-C(11)-C(13)-C(14)  | -74.91(12)  |
| O(2)-C(11)-C(13)-C(14)  | 161.27(12)  |
| O(2)-C(11)-O(1)-C(12)   | -62.55(14)  |

---

Symmetry transformations used to generate equivalent atoms:

Table 7. Hydrogen bonds for **7a** [ $\text{\AA}$  and  $^\circ$ ].

| D-H...A            | d(D-H) | d(H...A) | d(D...A)   | $\angle(\text{DHA})$ |
|--------------------|--------|----------|------------|----------------------|
| O(2)-H(2)...O(3)#1 | 0.82   | 2.02     | 2.8055(14) | 161.1                |

Symmetry transformations used to generate equivalent atoms:

#1  $x, -y+1/2, z+1/2$

## 6. Copies of the $^1\text{H}$ and $^{13}\text{C}$ NMR spectra

2a

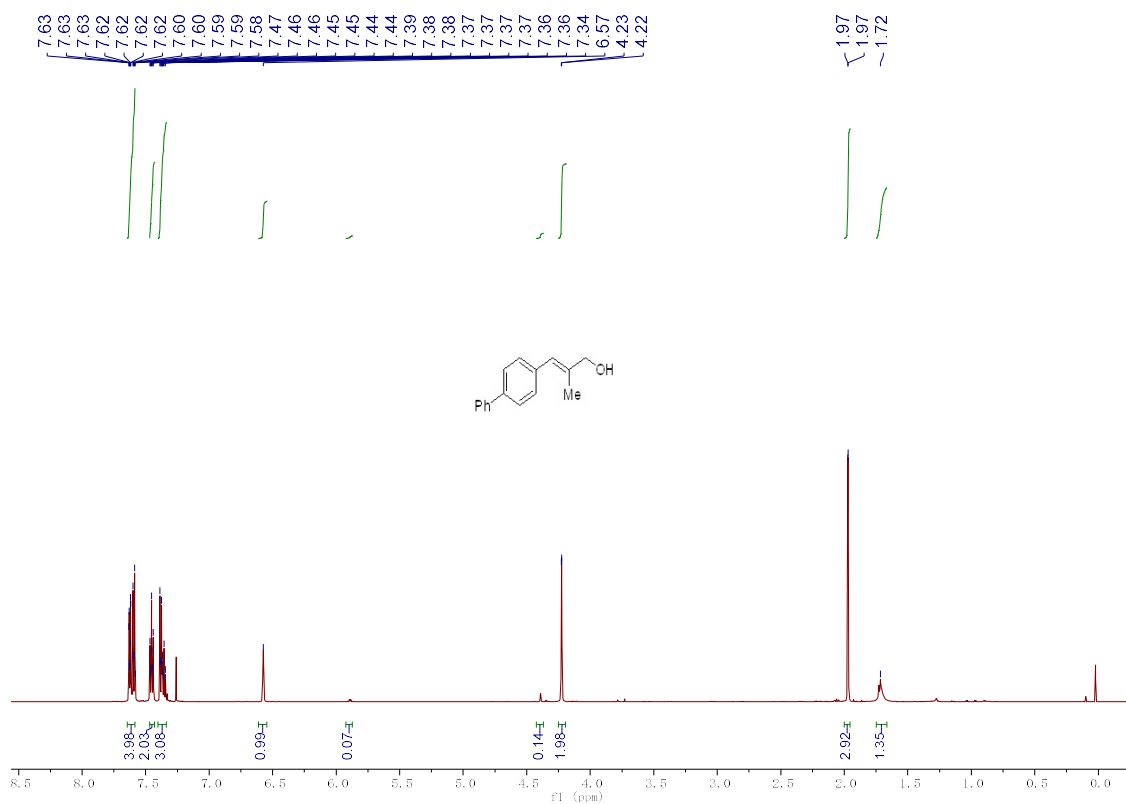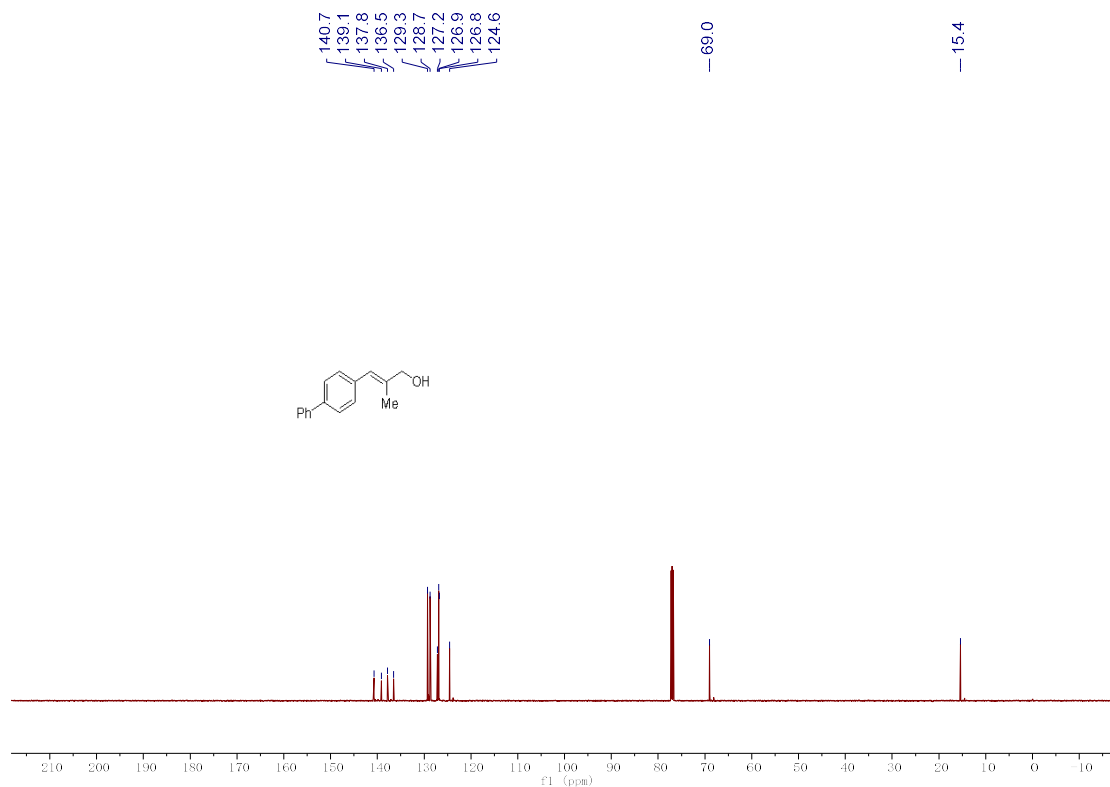

2b

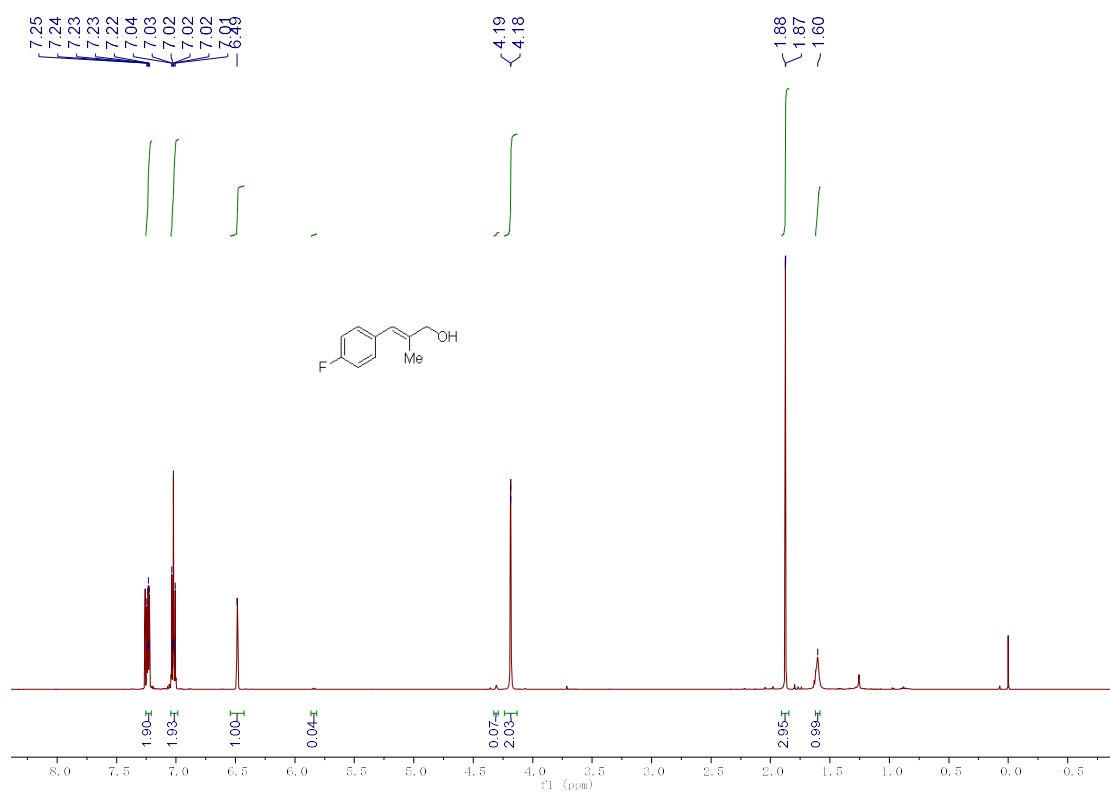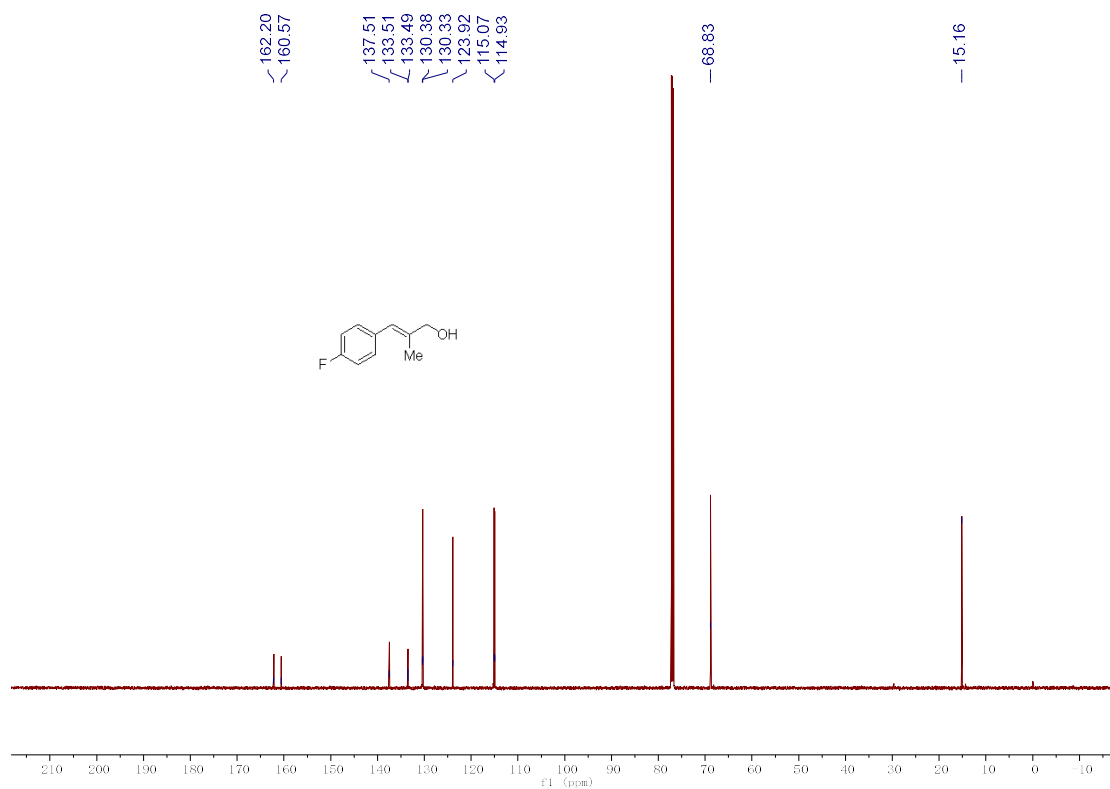

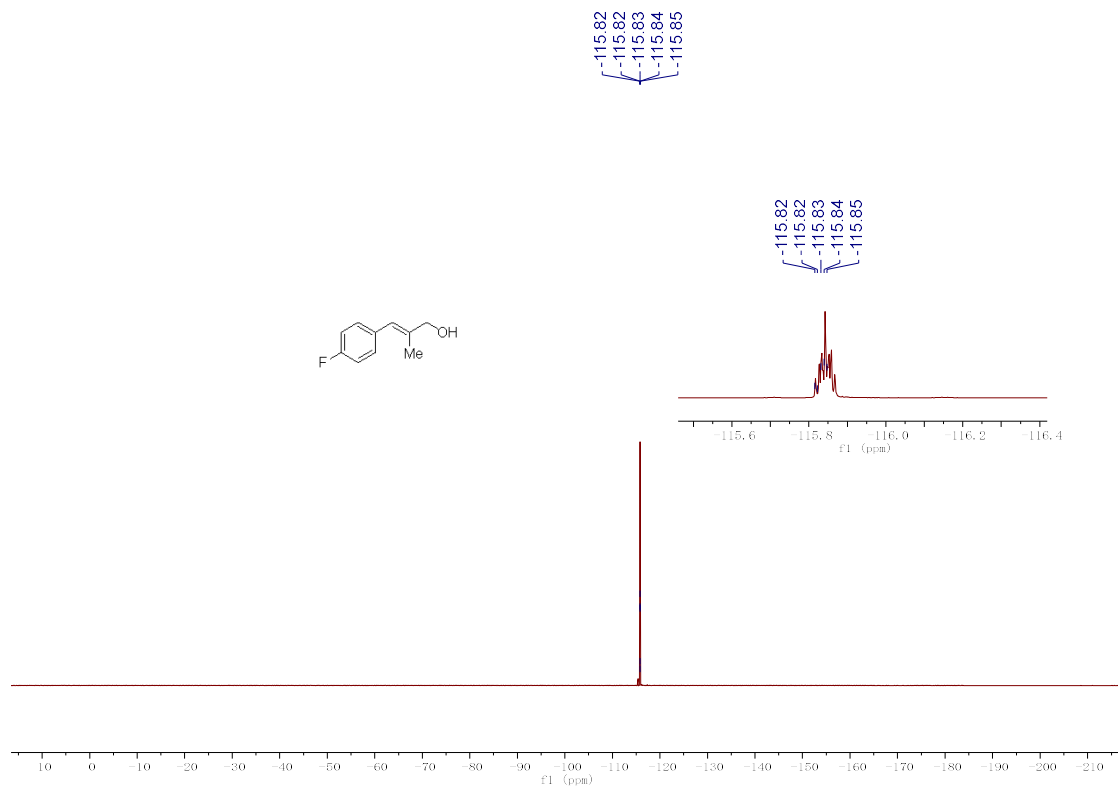



2c

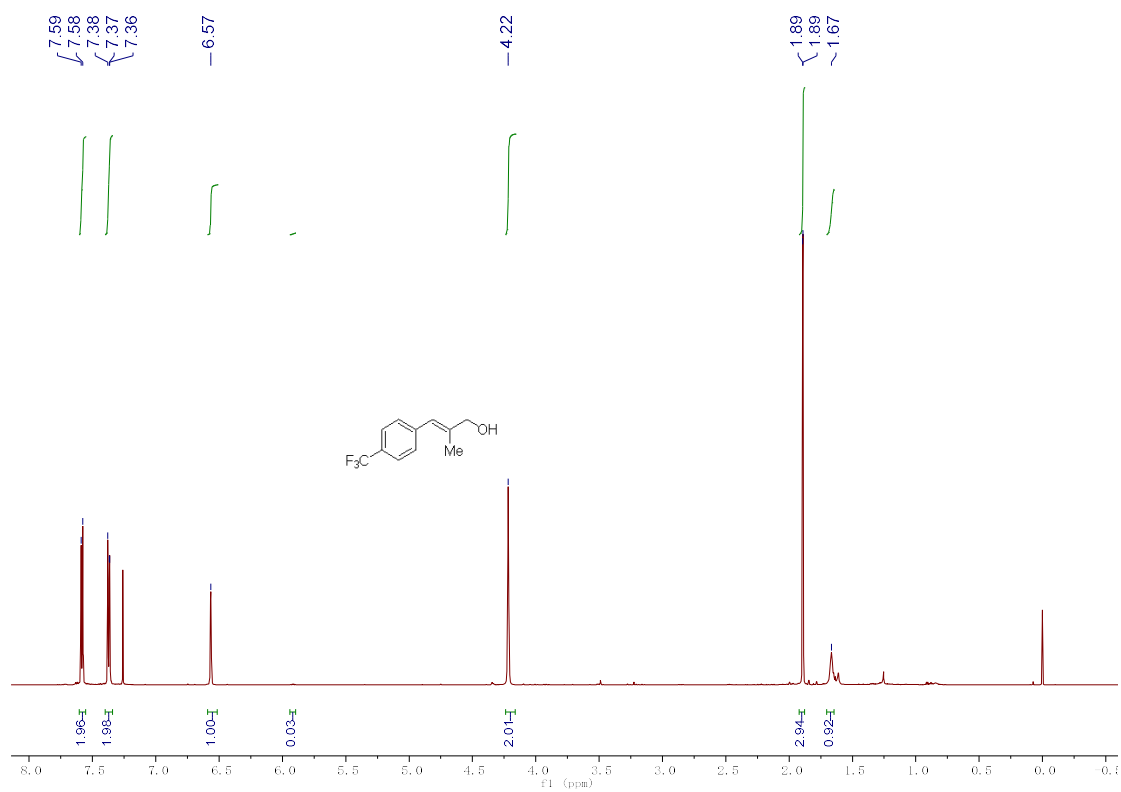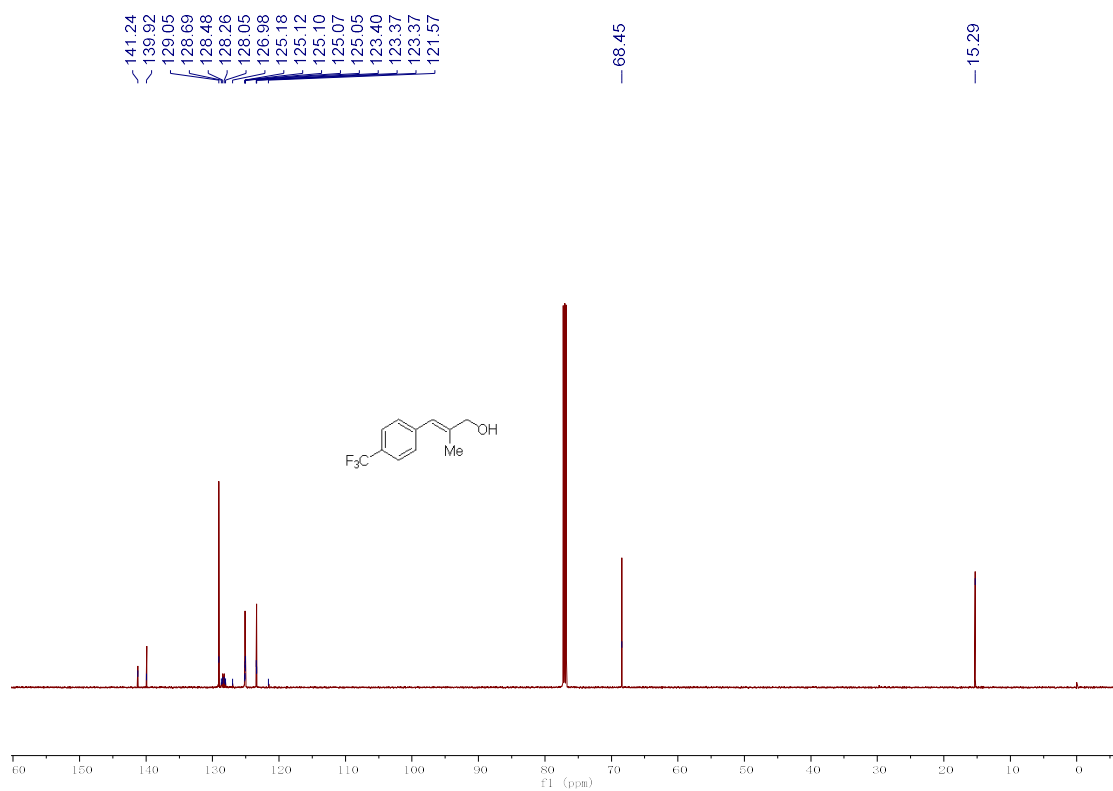

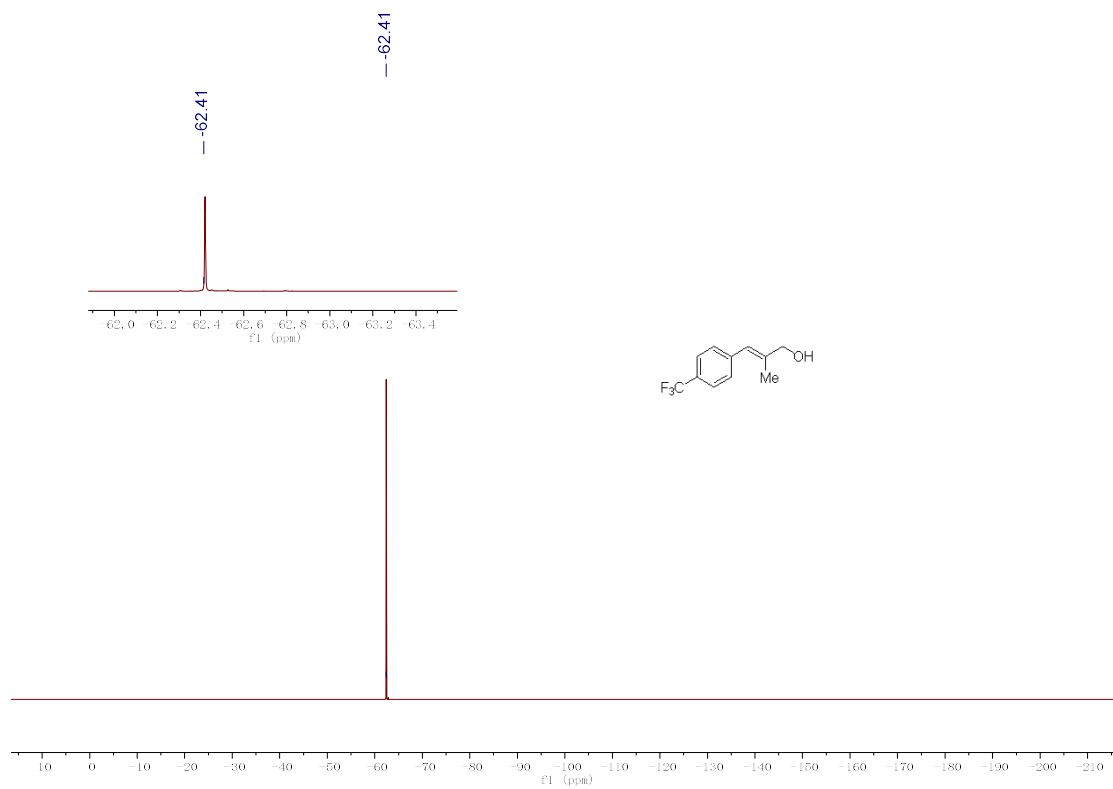

2d

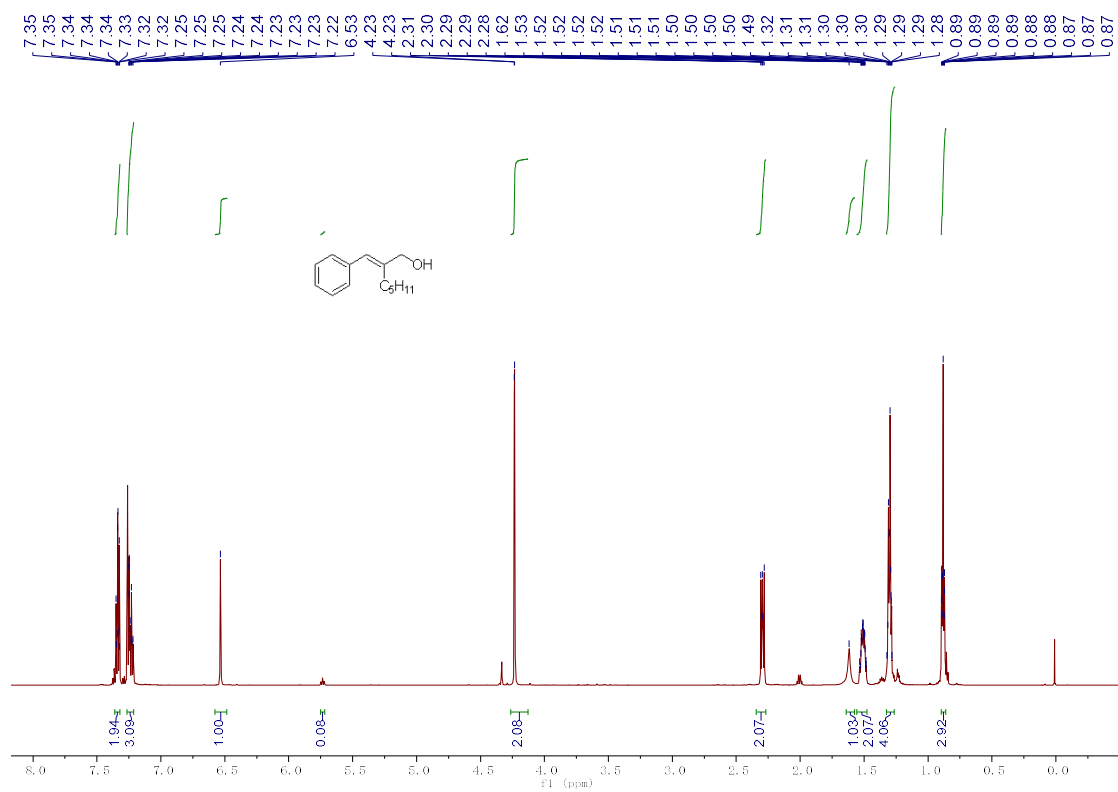

142.42  
137.57  
128.63  
128.18  
126.45  
125.28

67.05

32.03  
28.73  
28.07  
22.44  
14.03

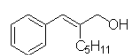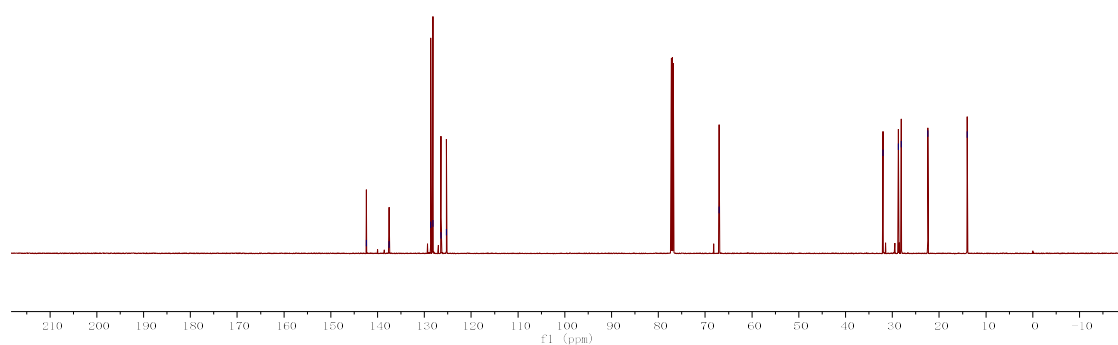

2e

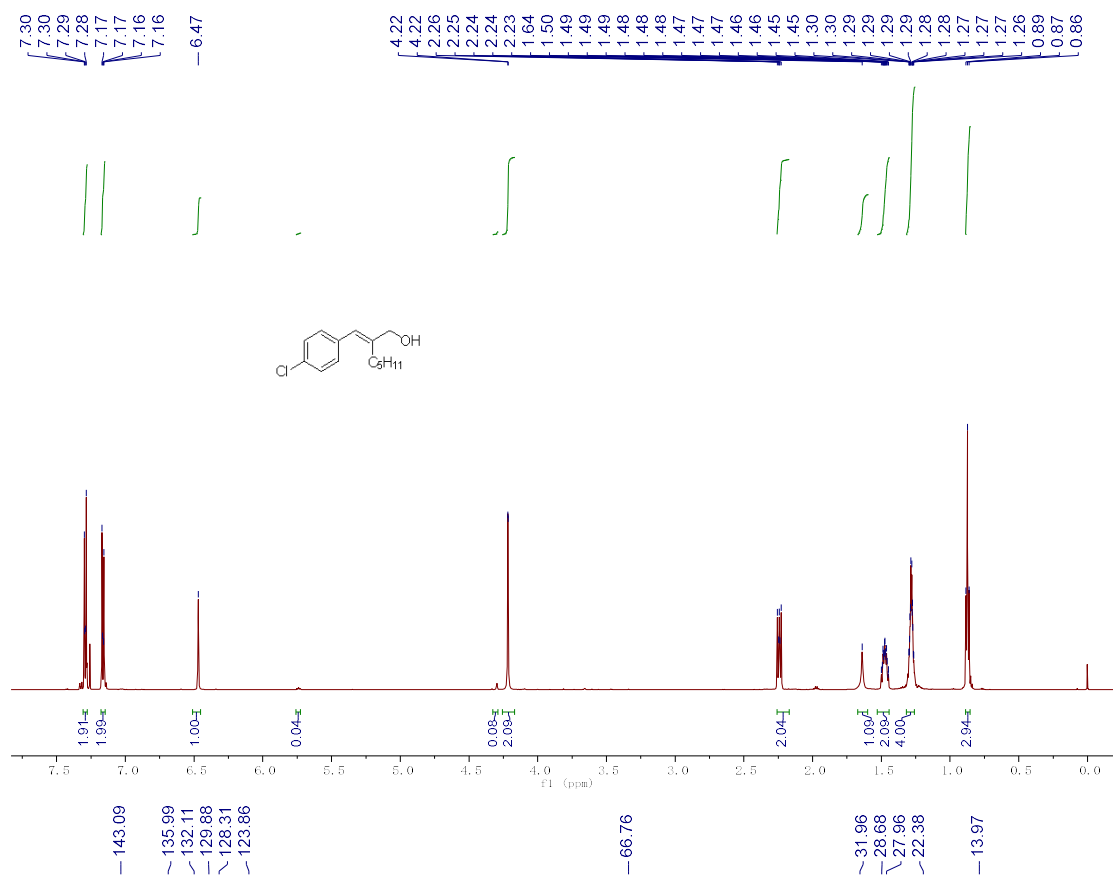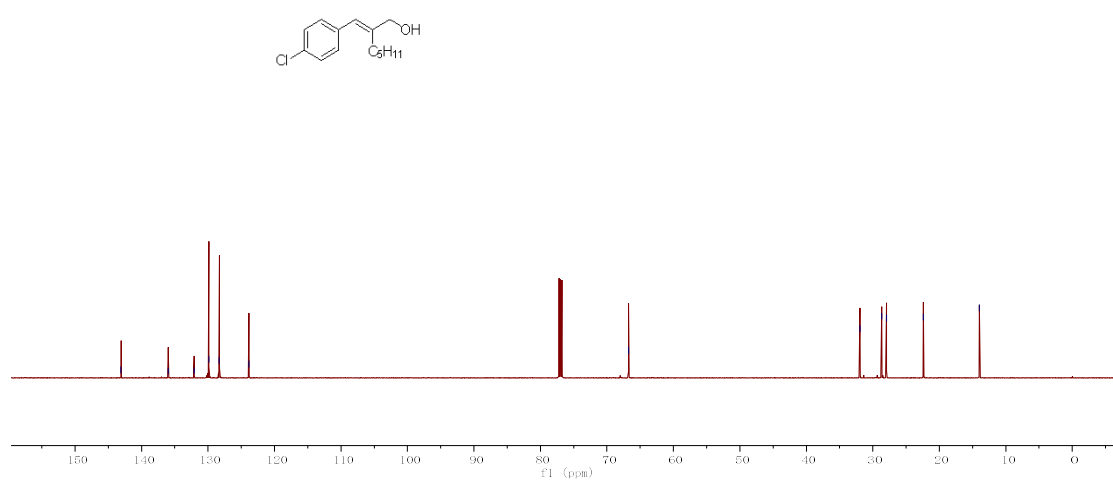

2f

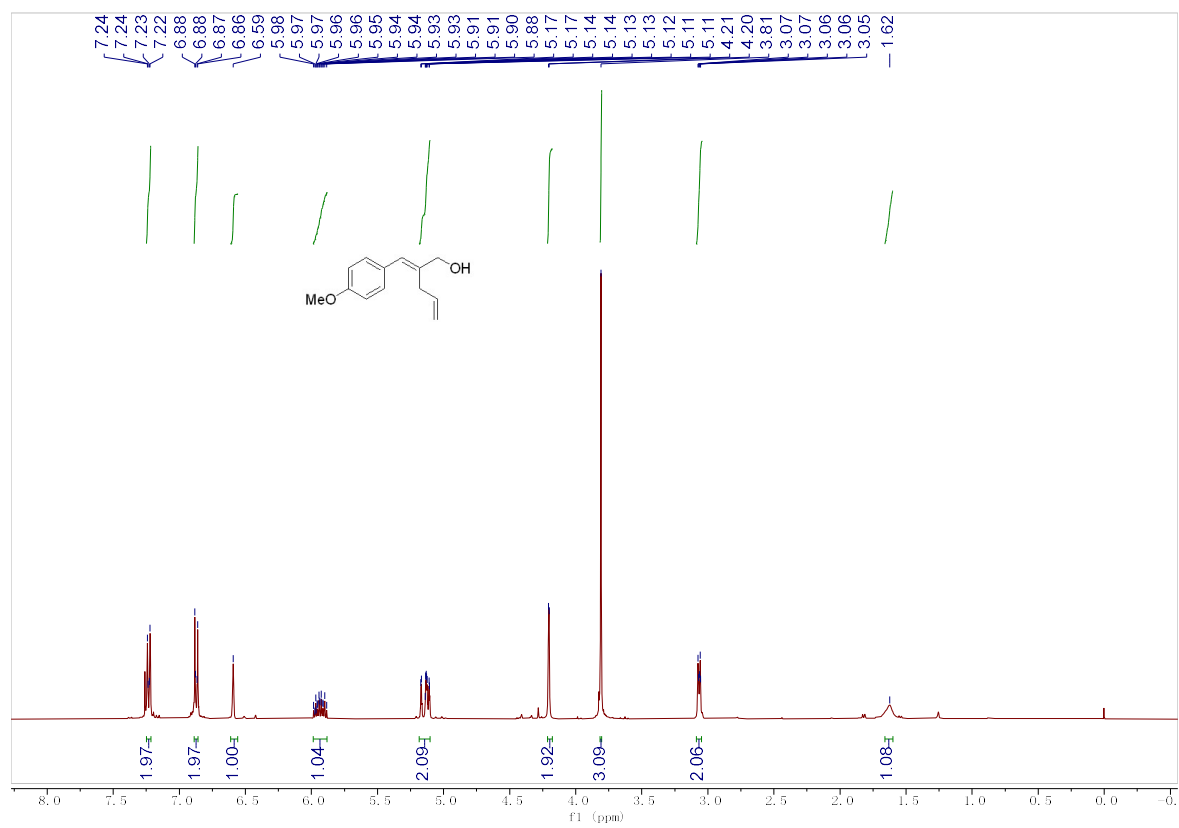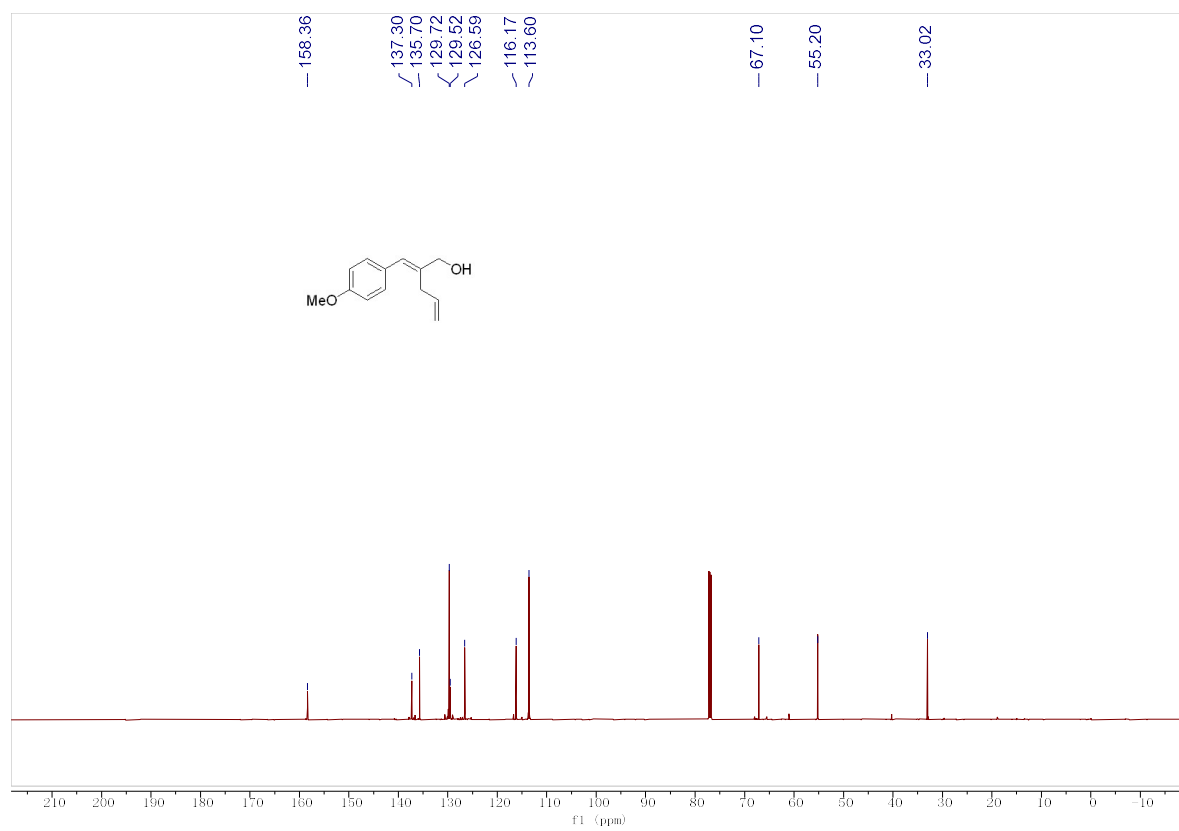

2g

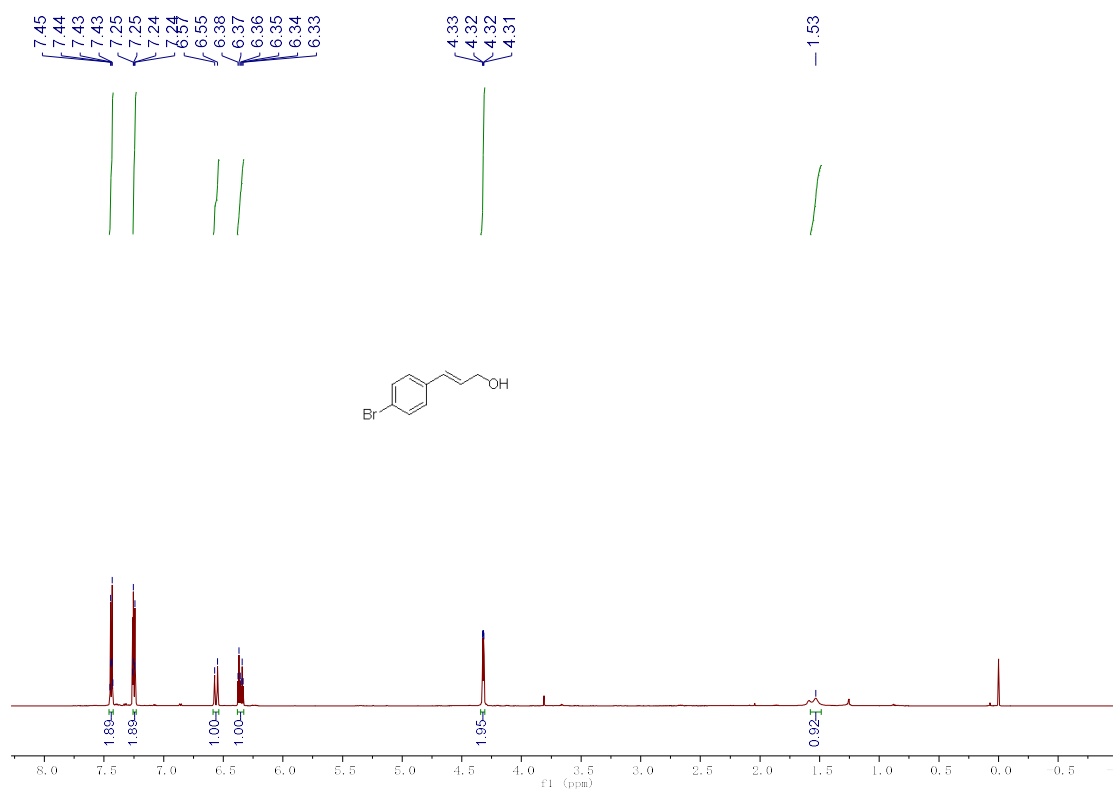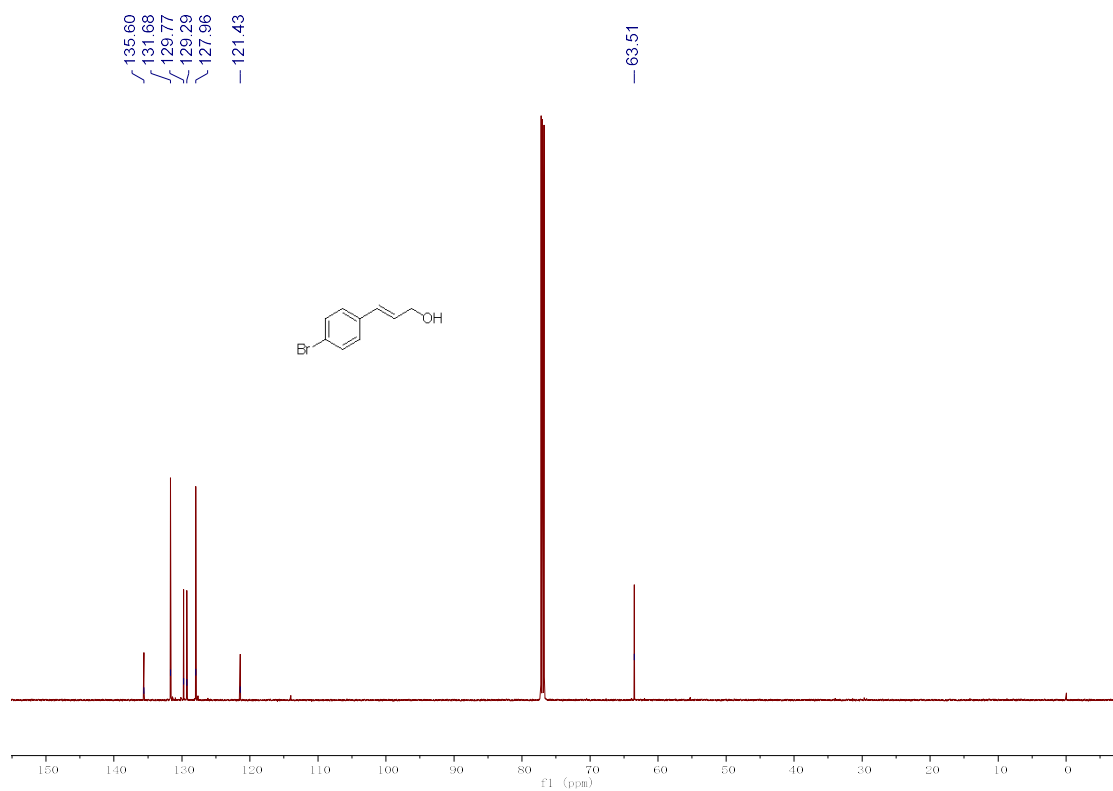

2h

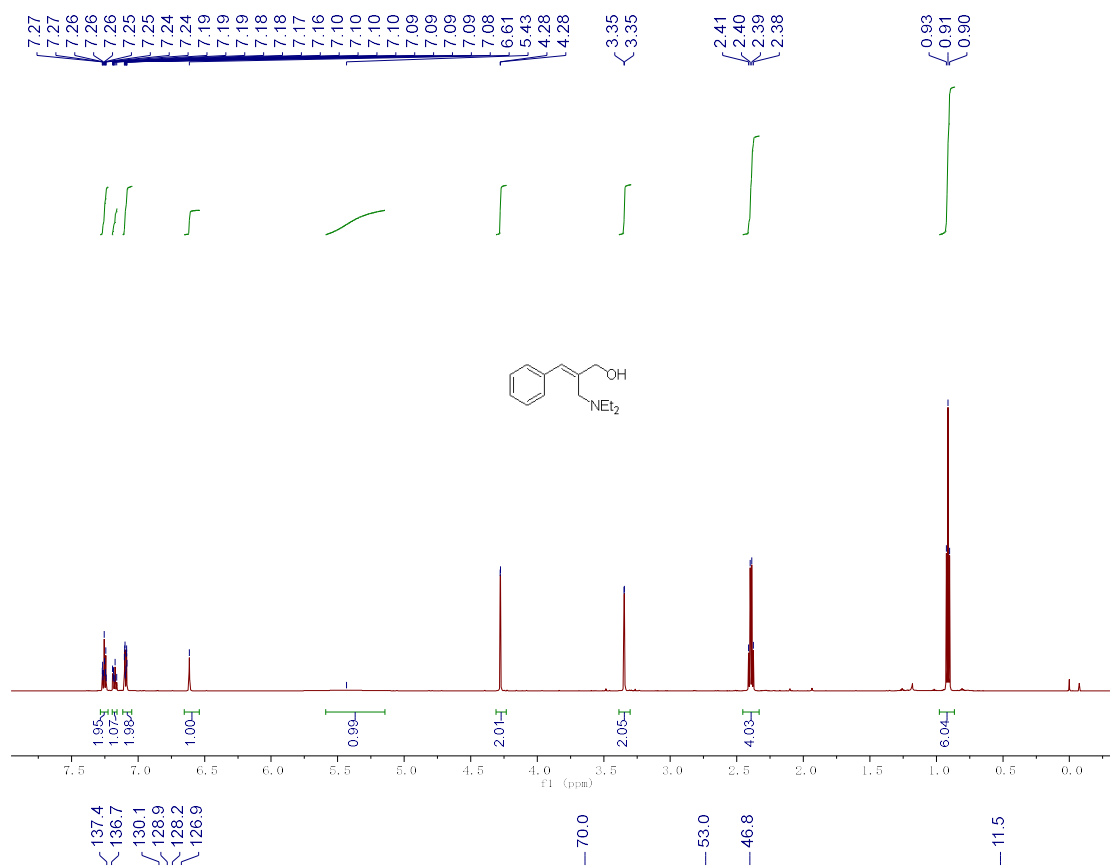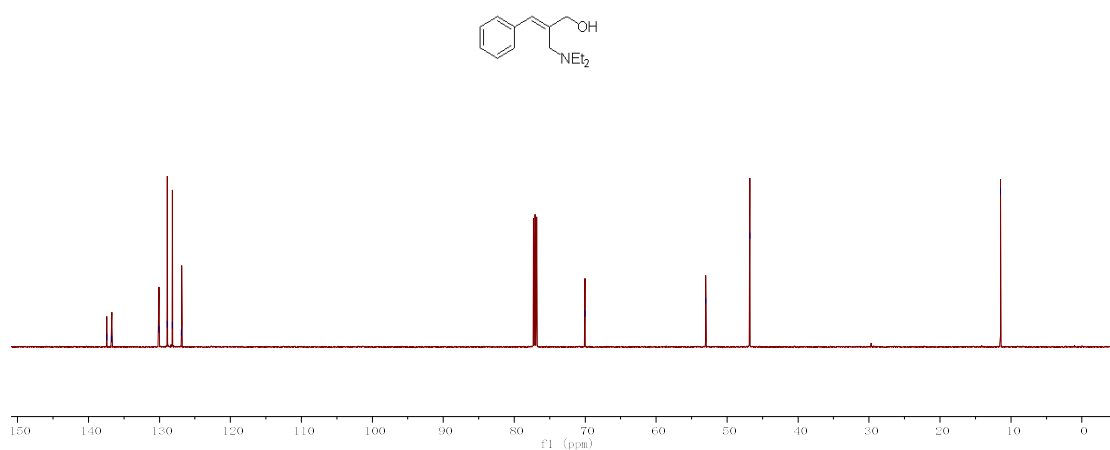

2i

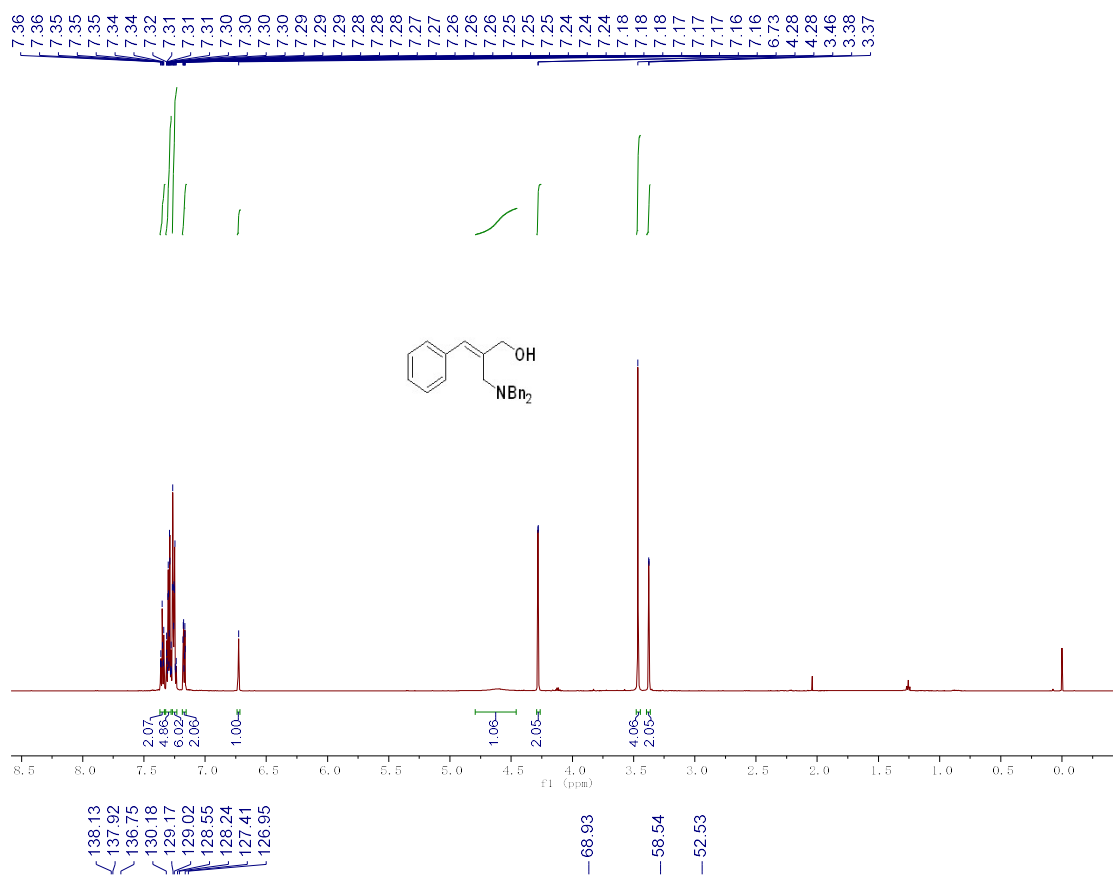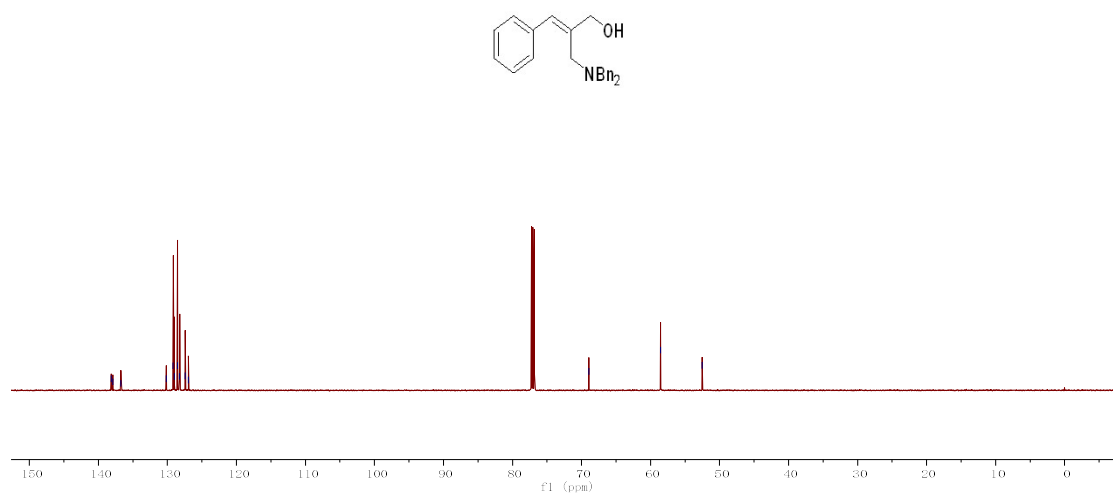



2j

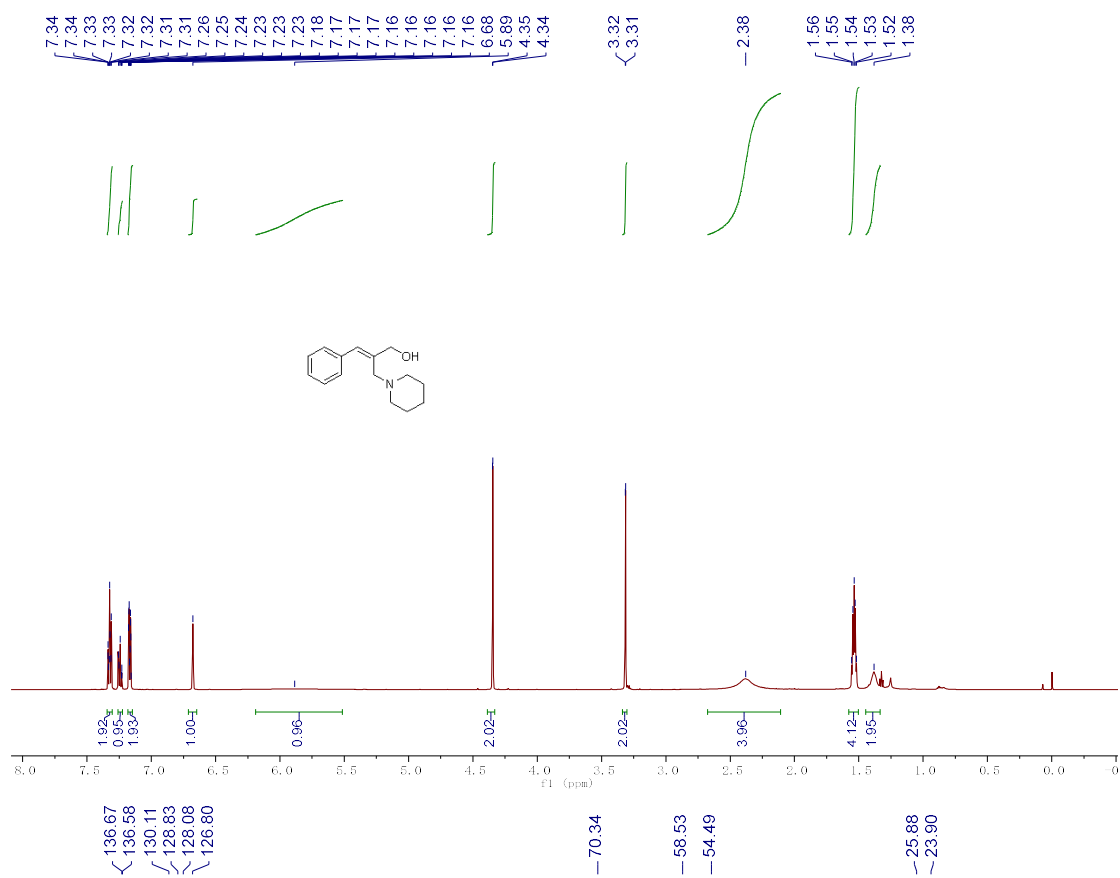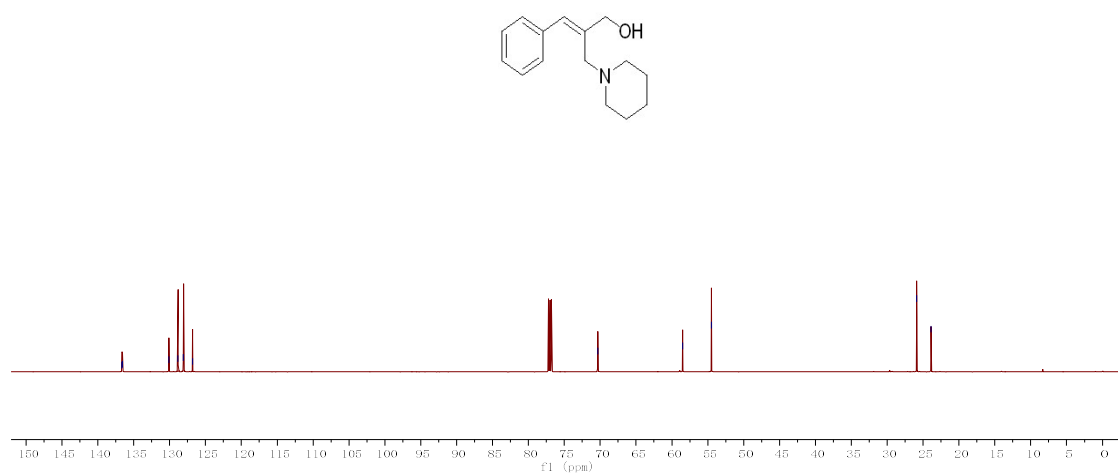

2k

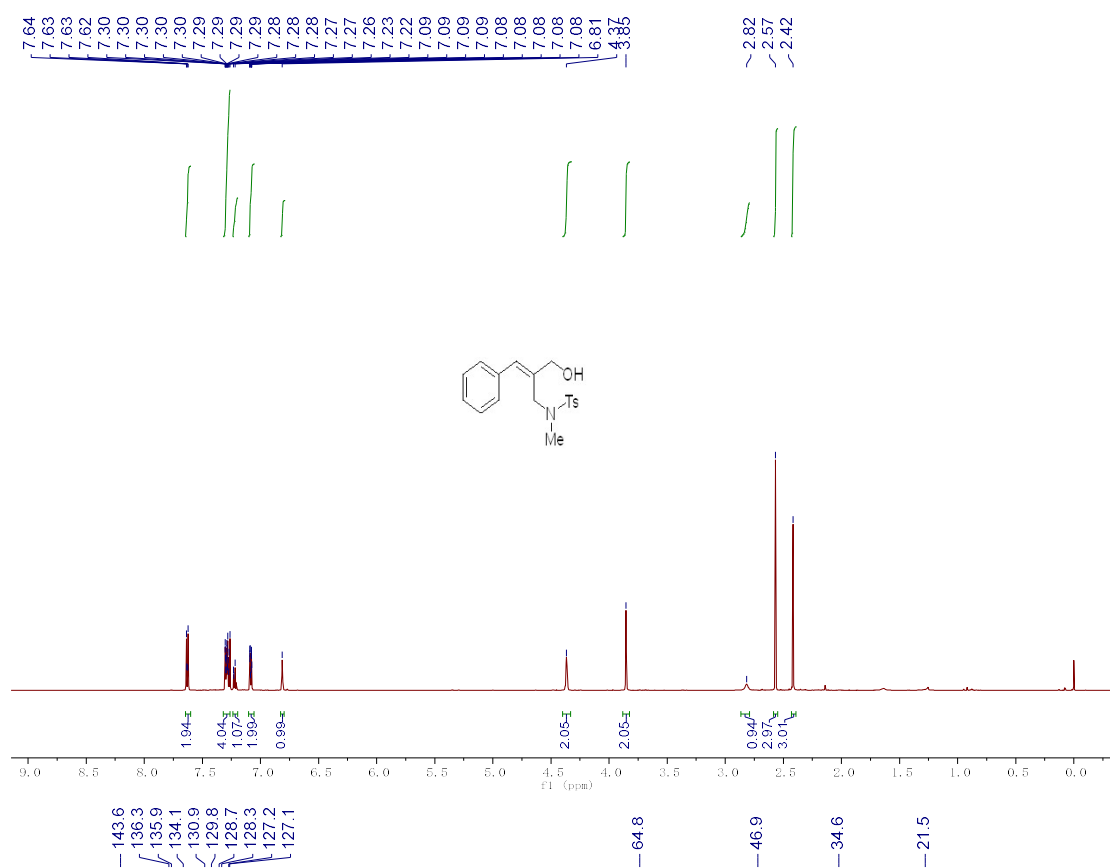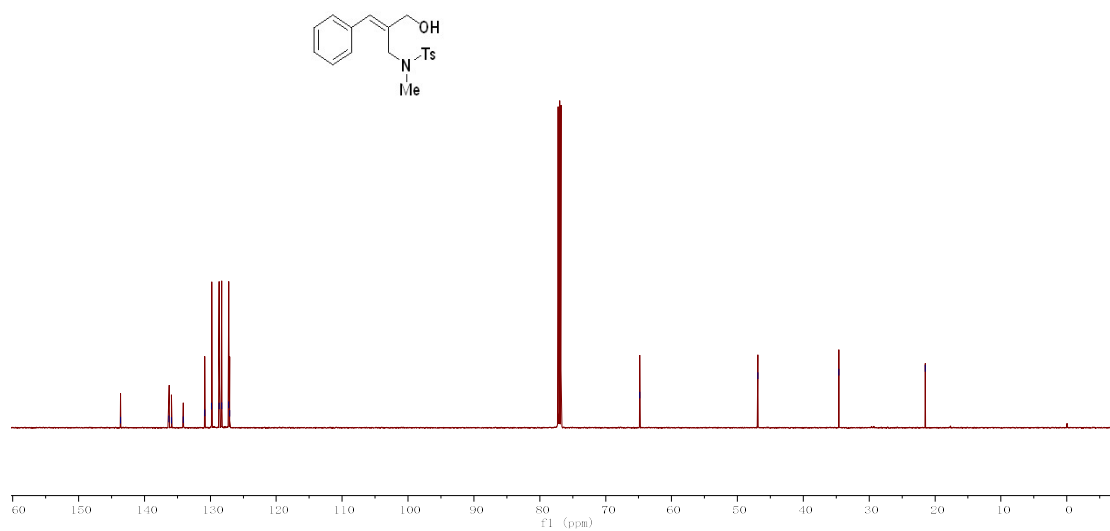

2I

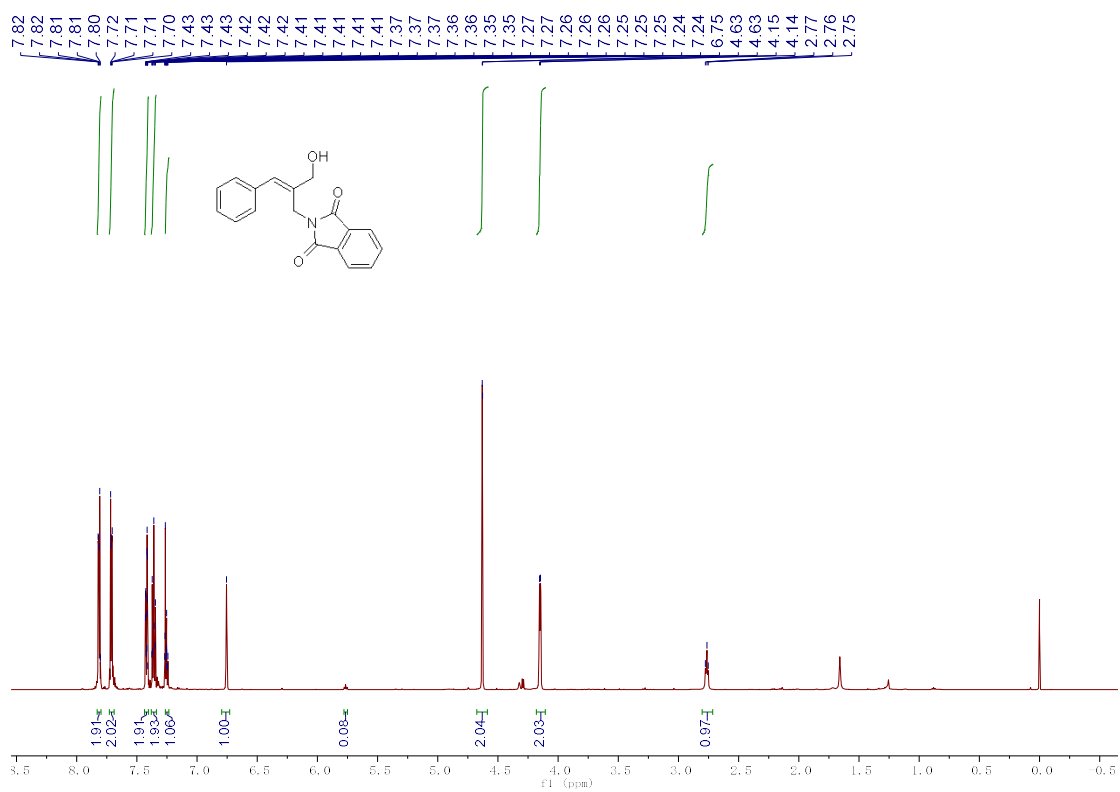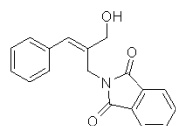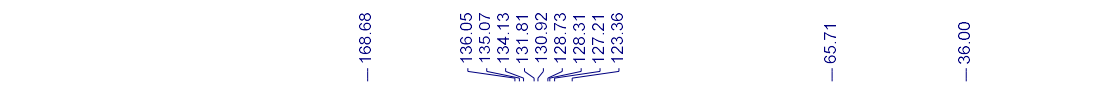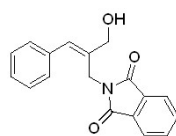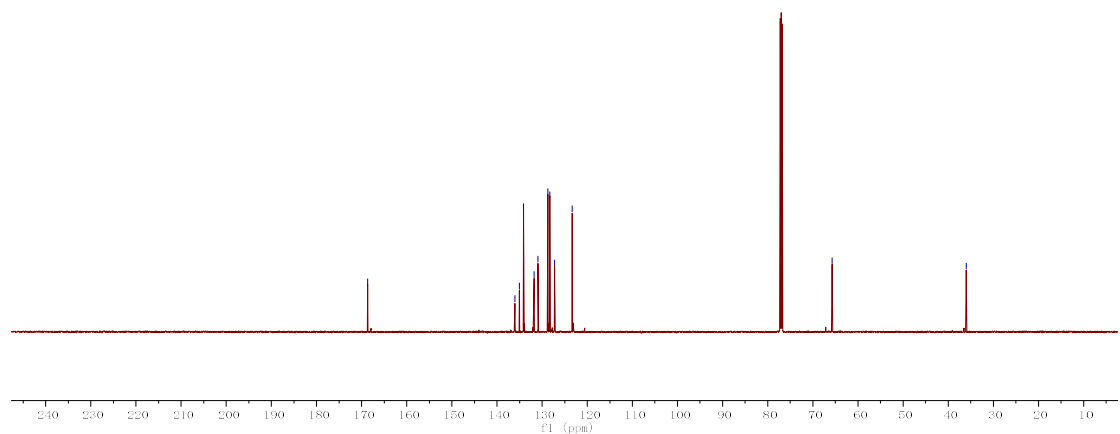

2m

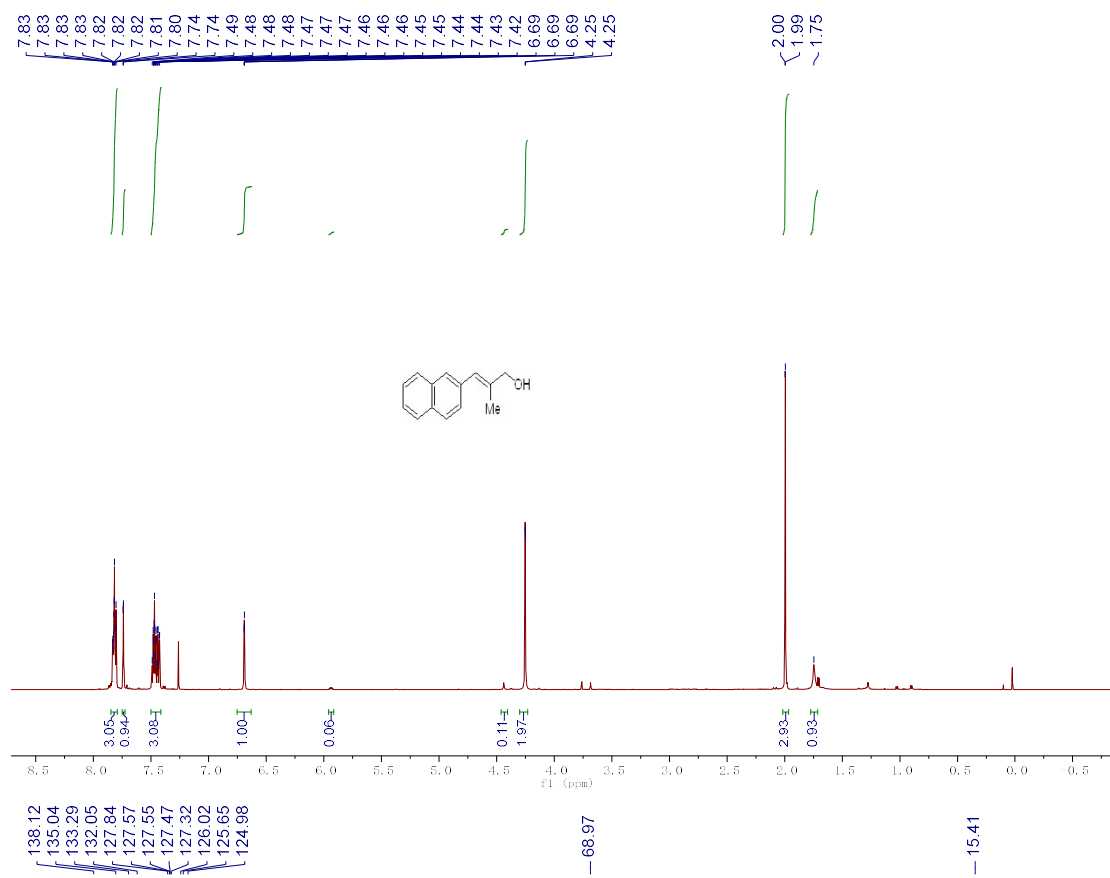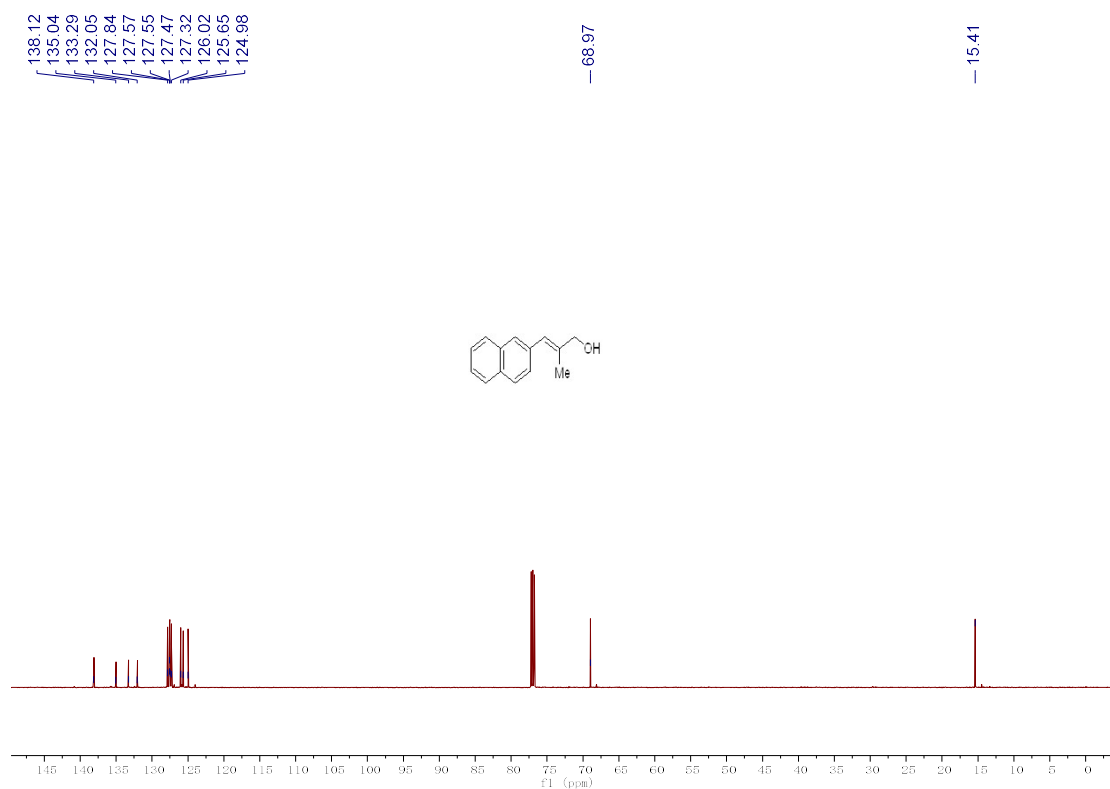

2n

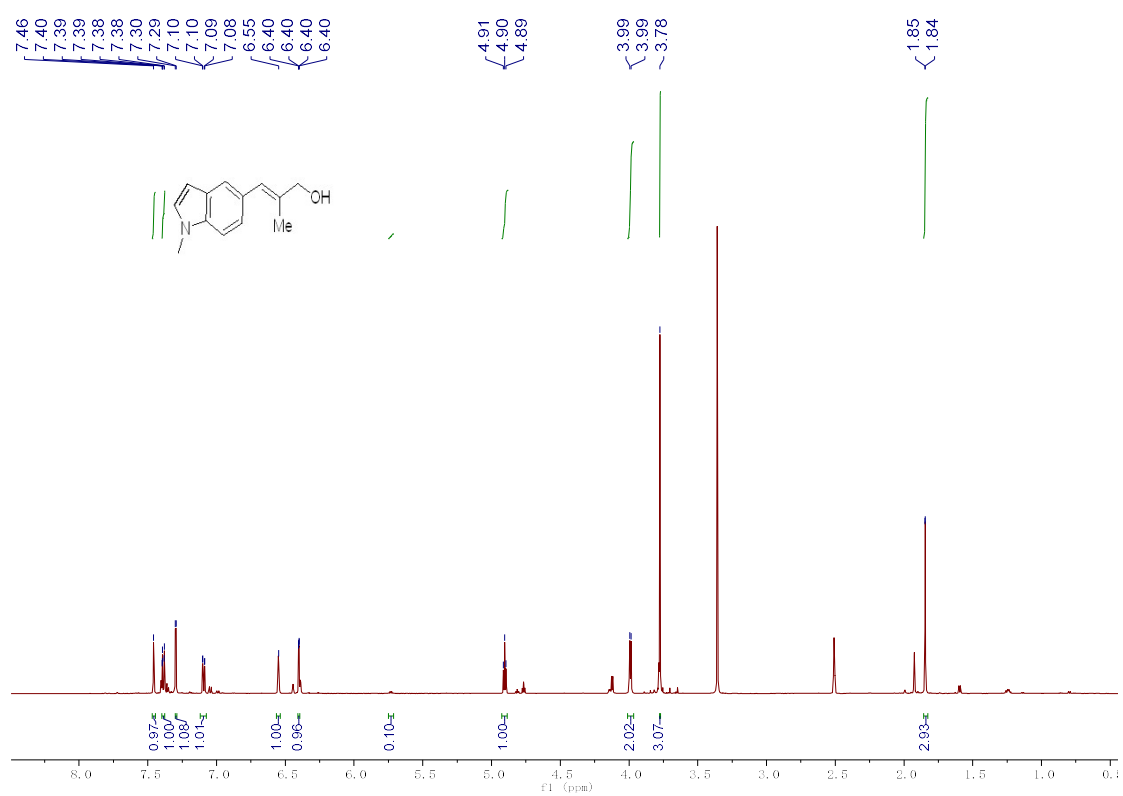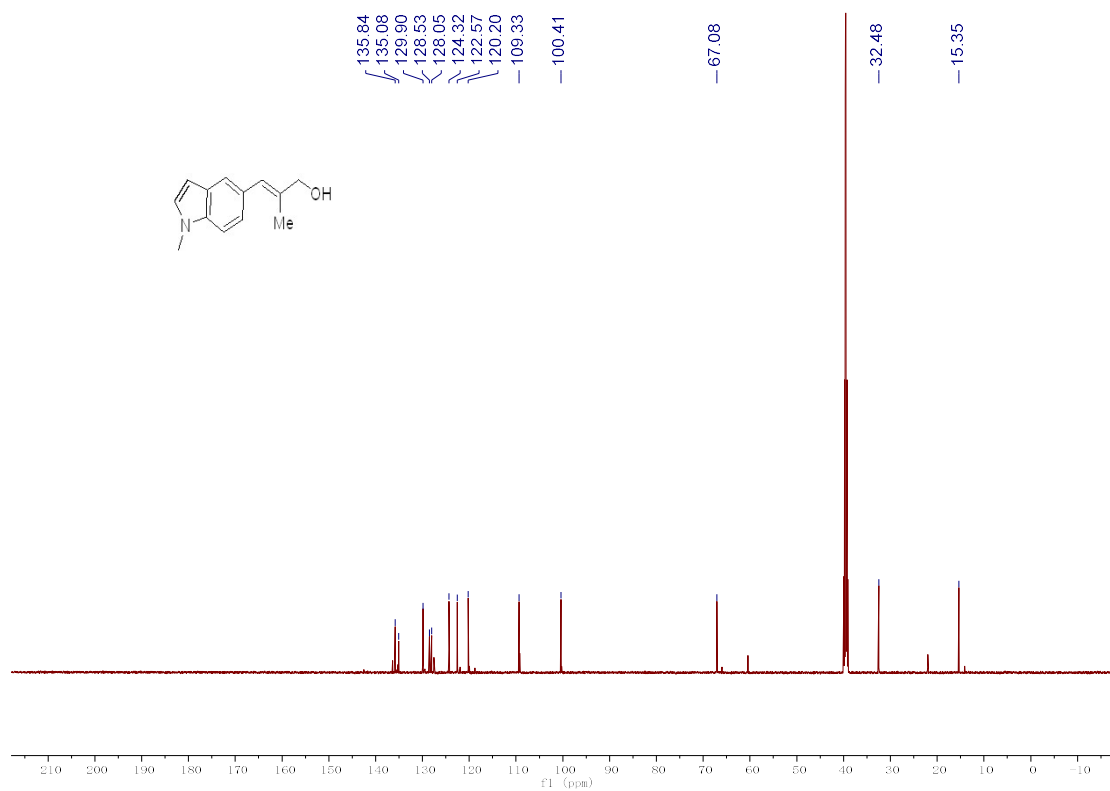

20

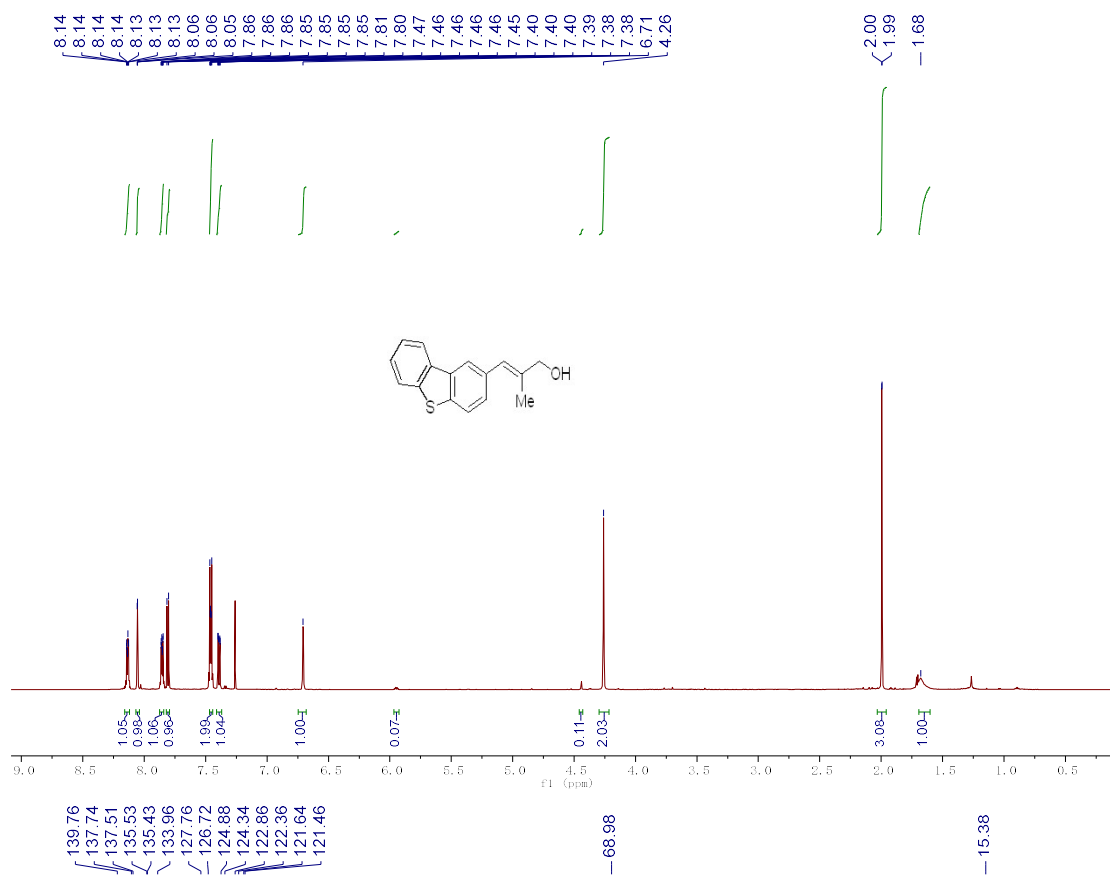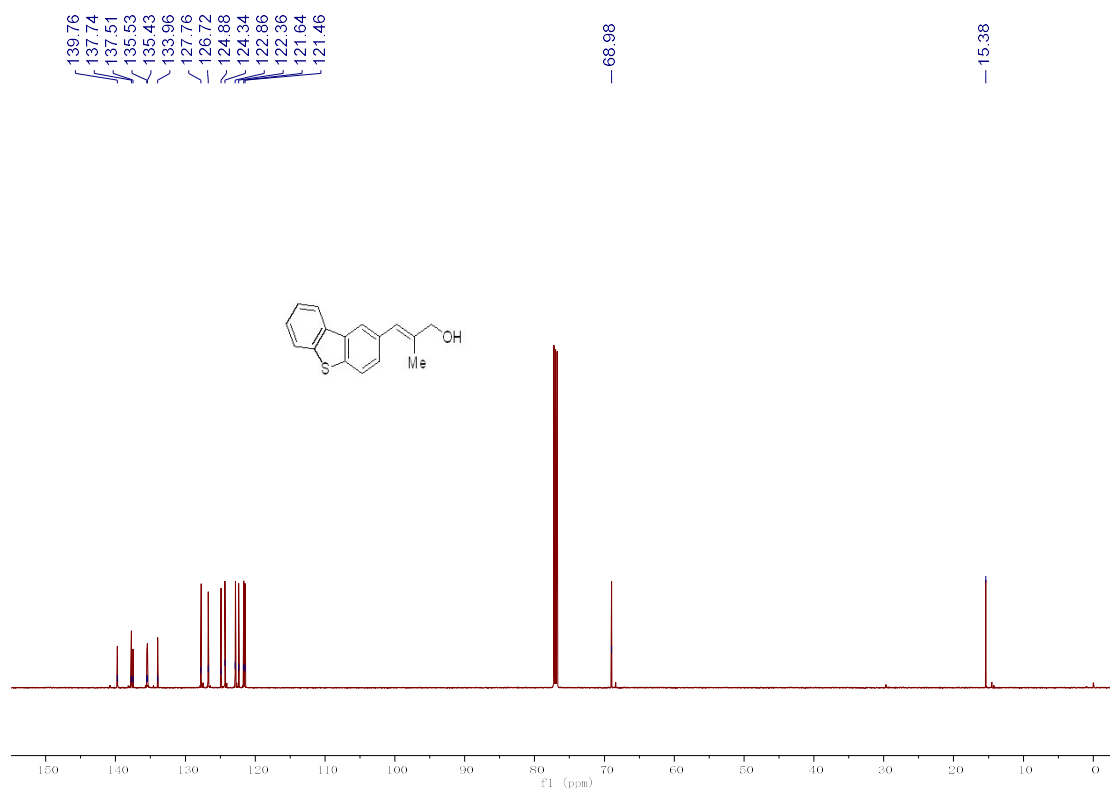

2p

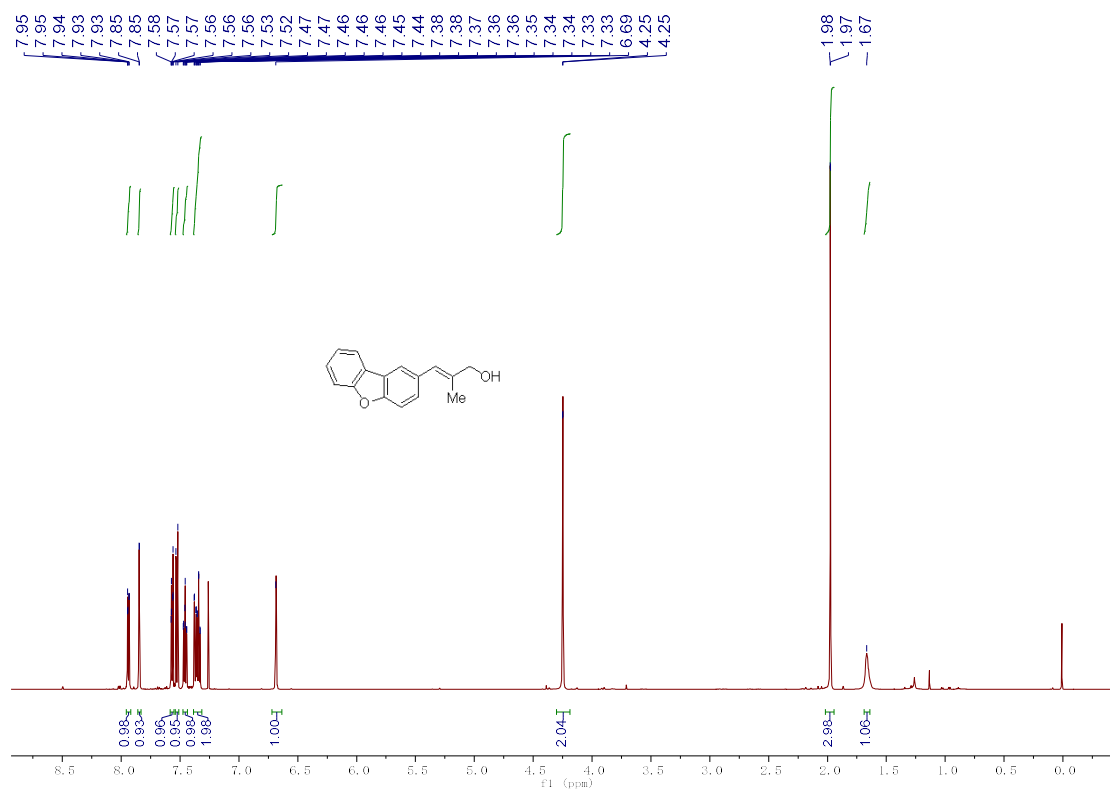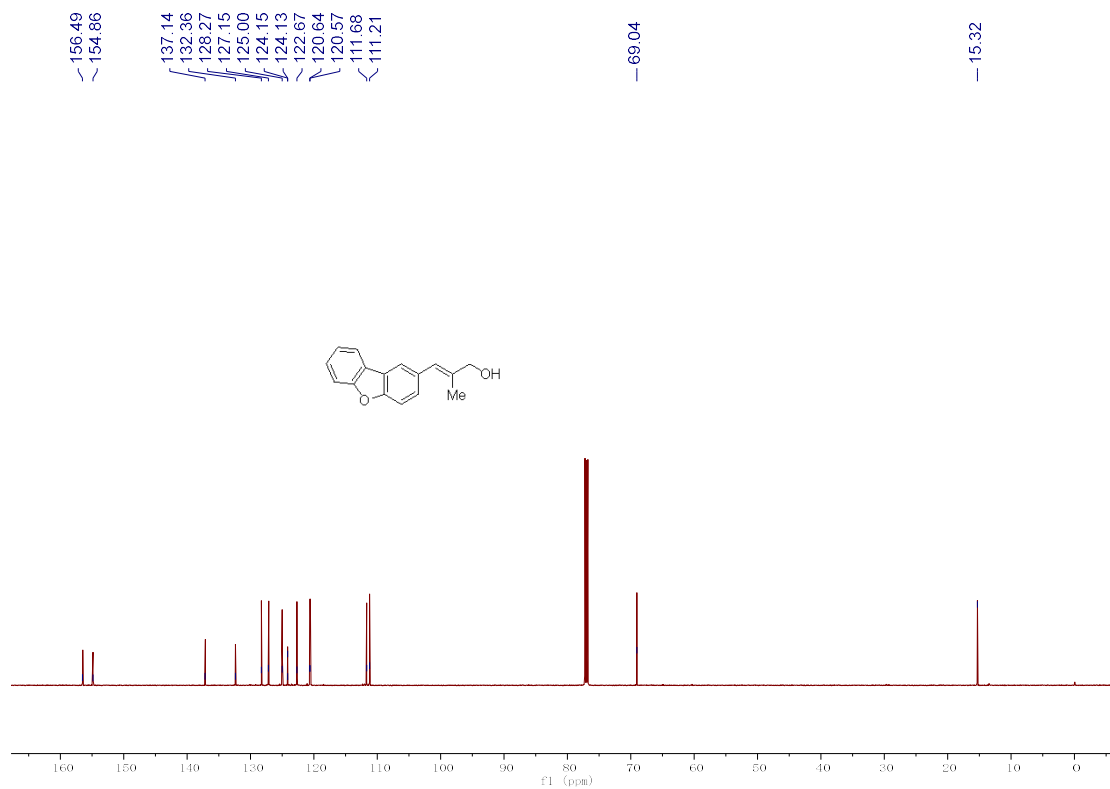

2q

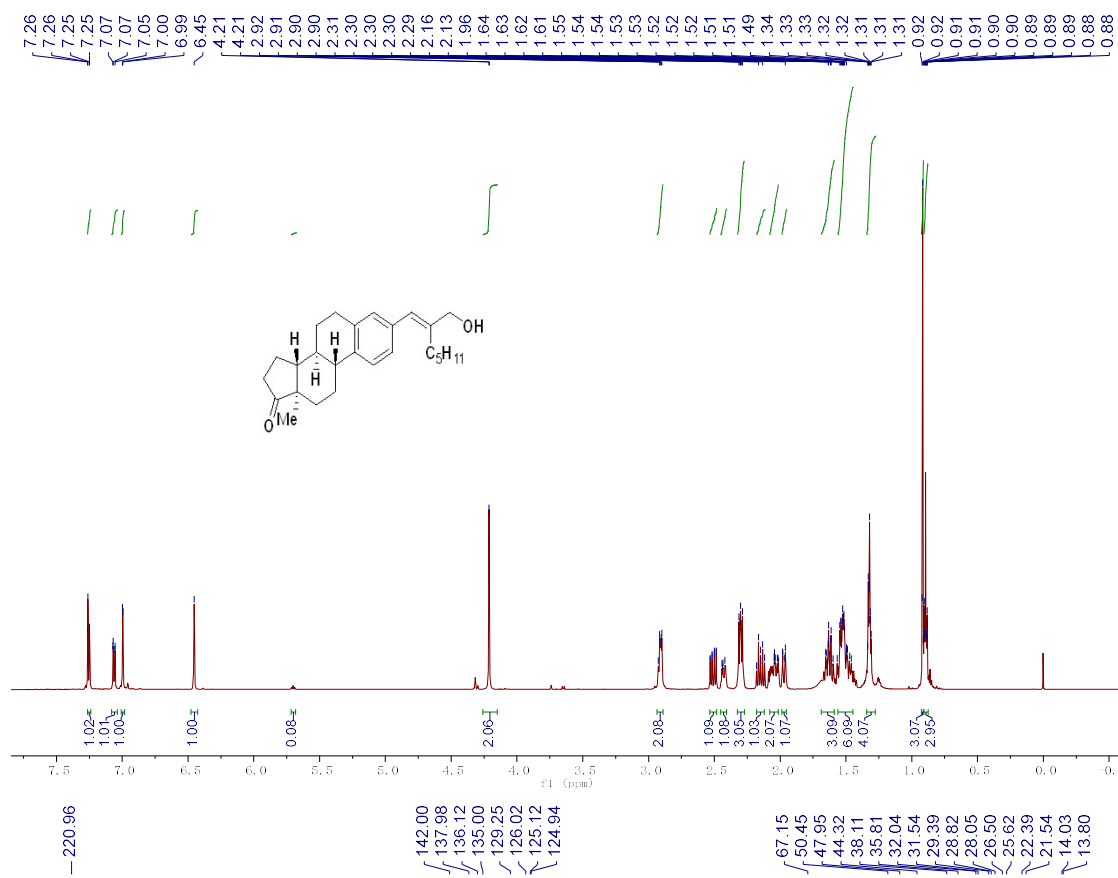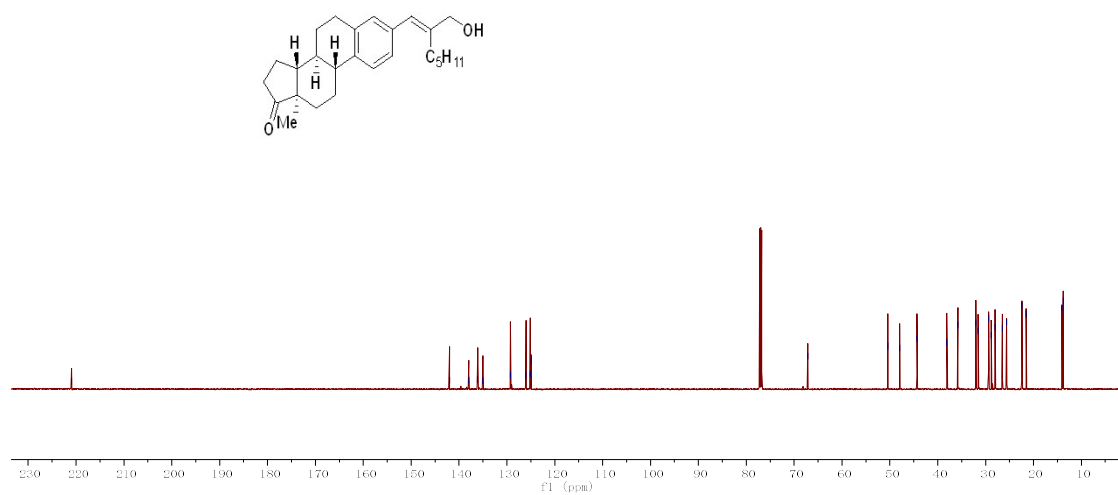



2r

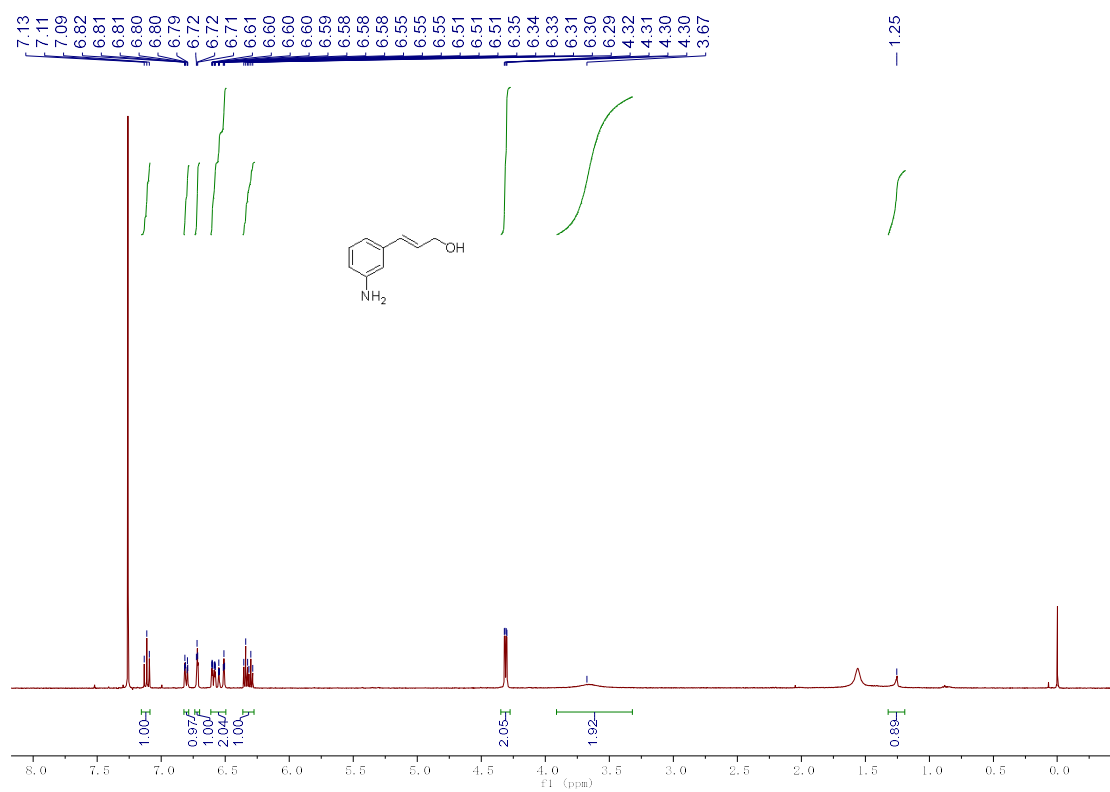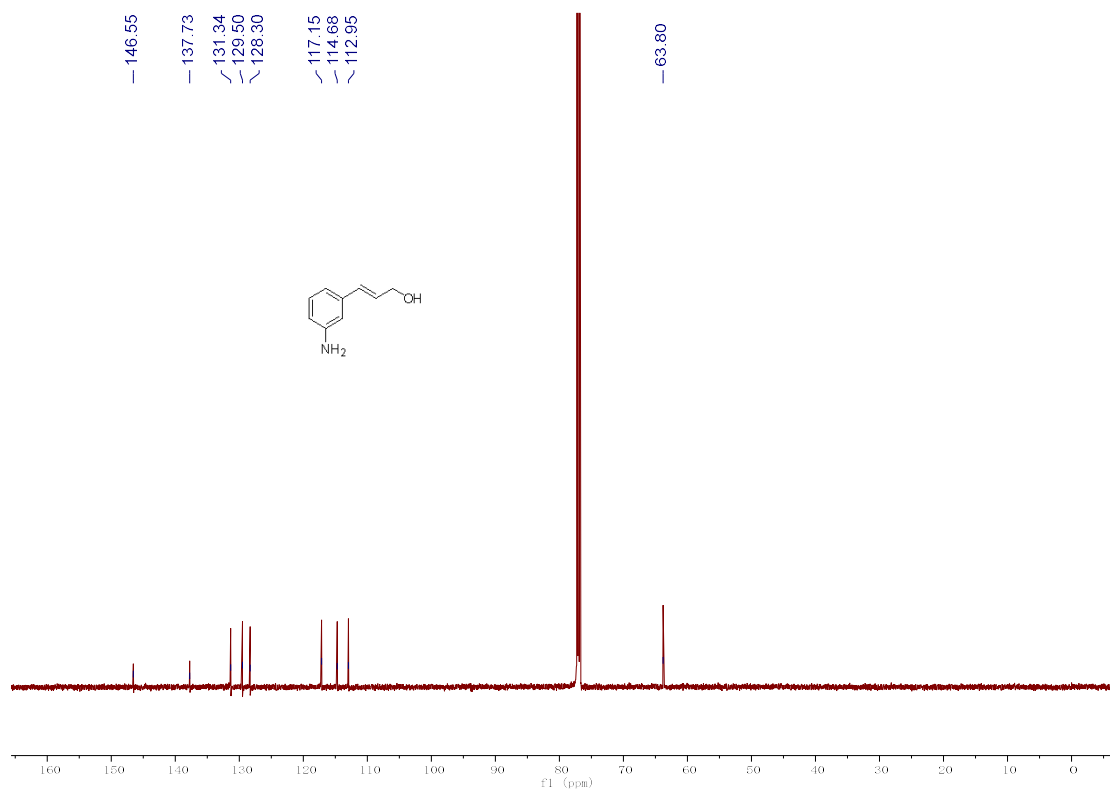

2s

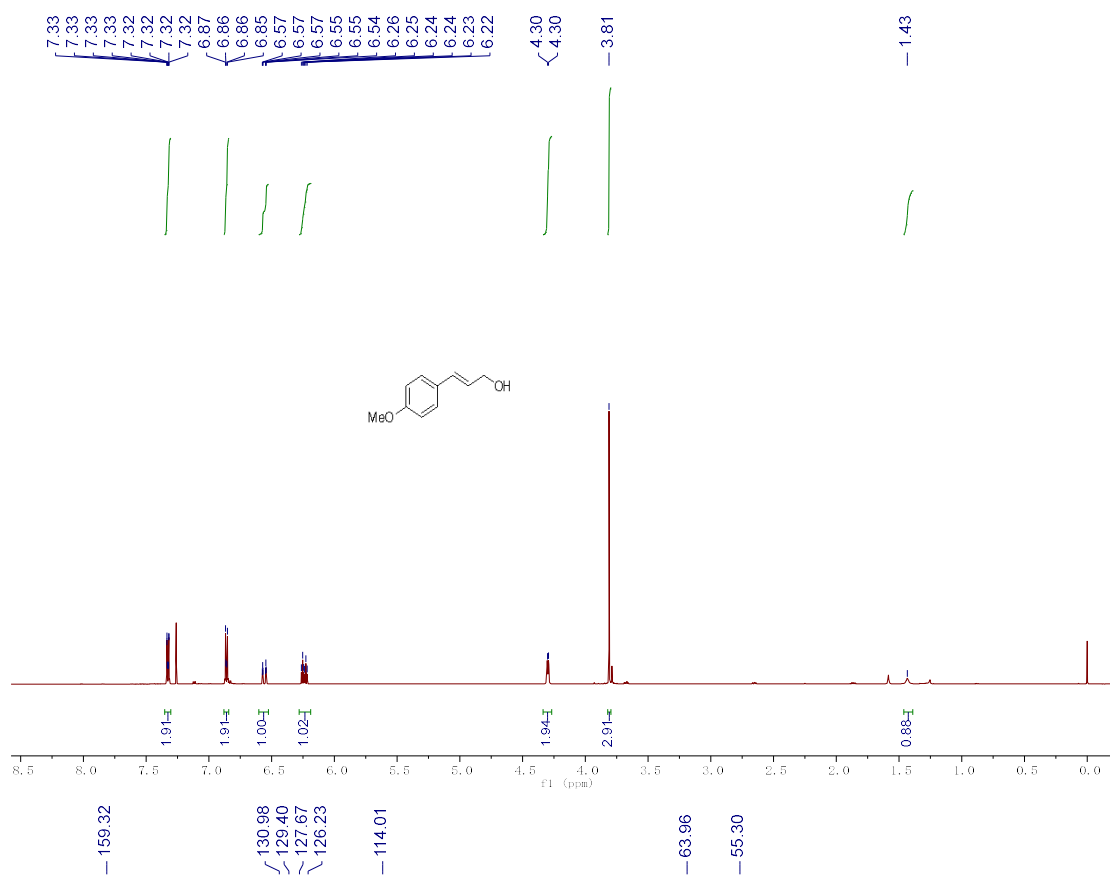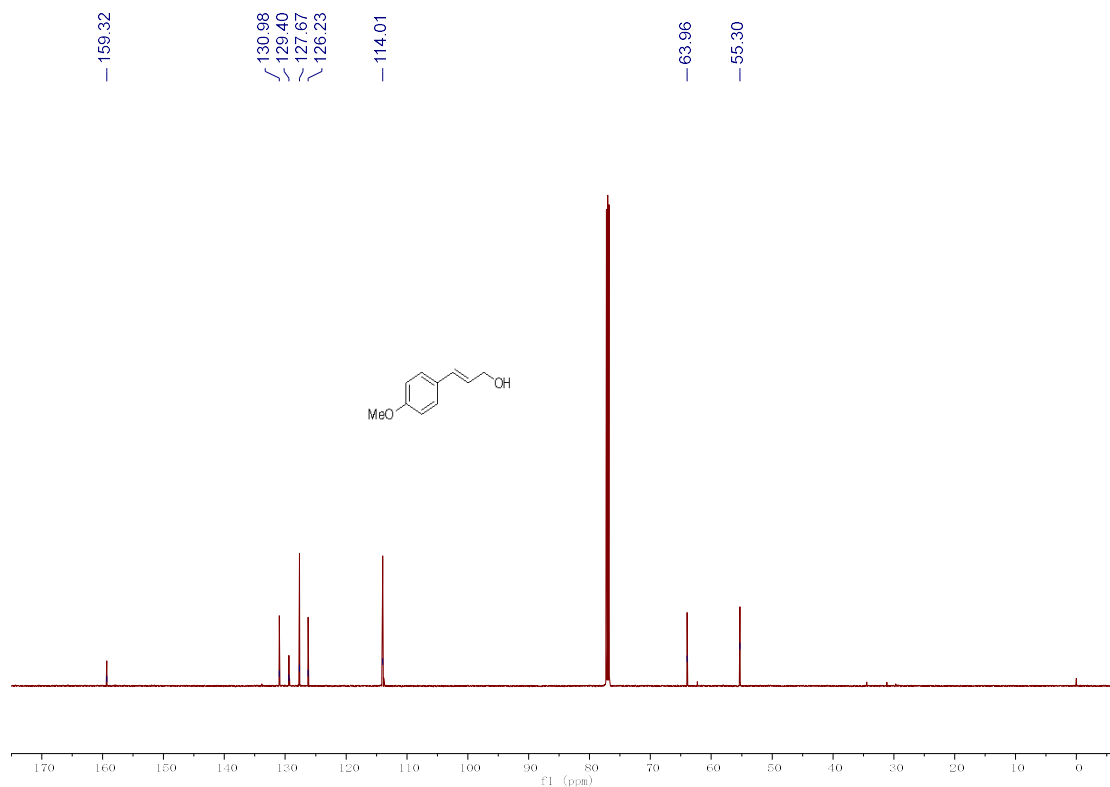

2t

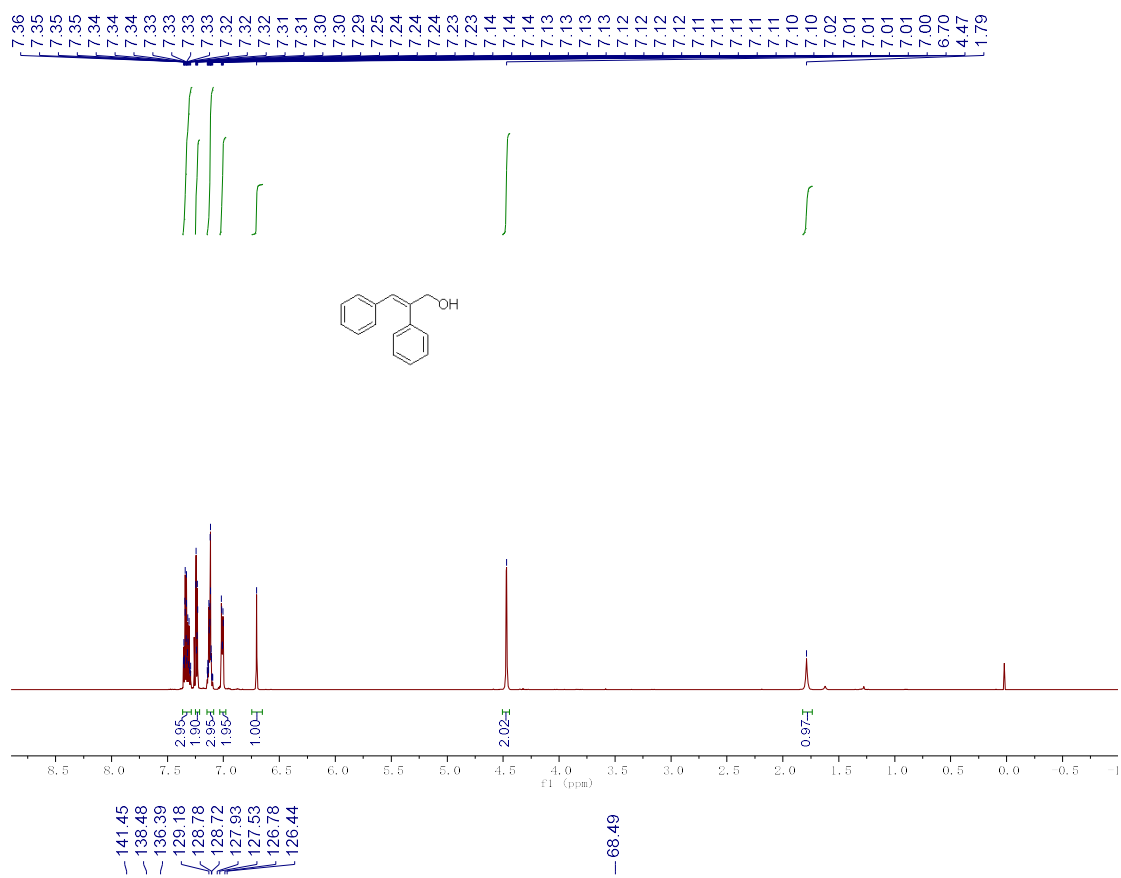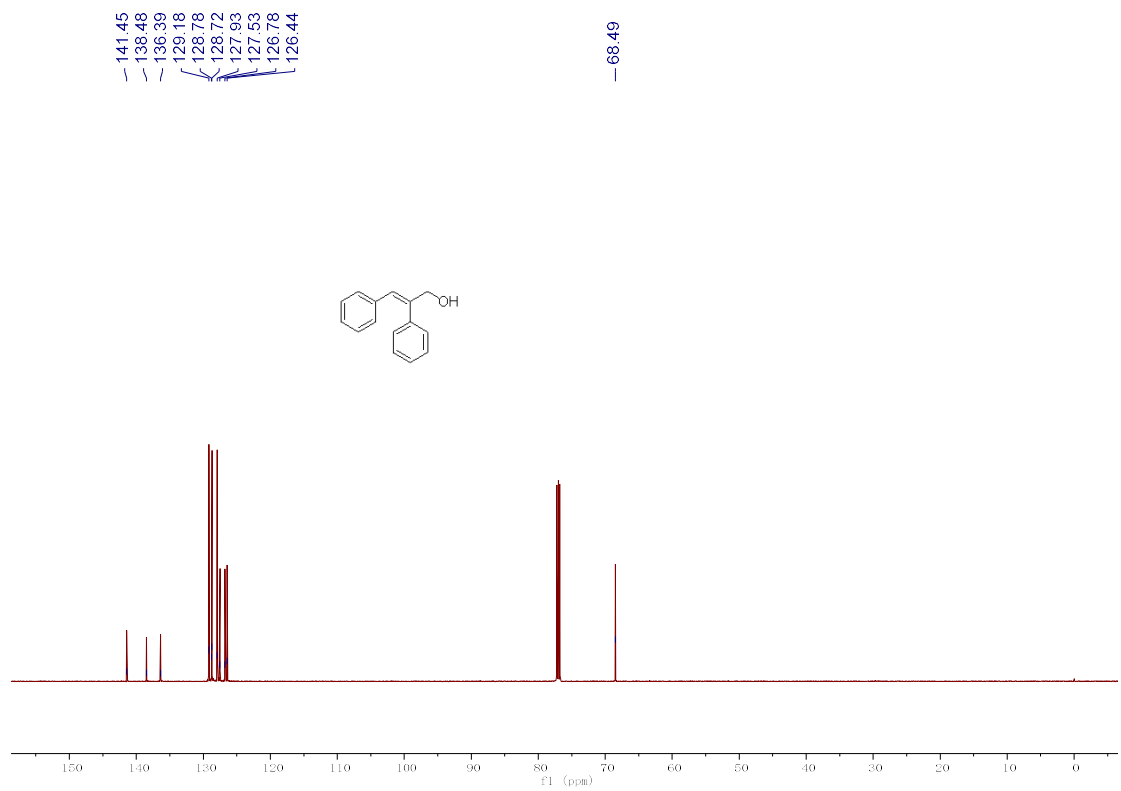

2u

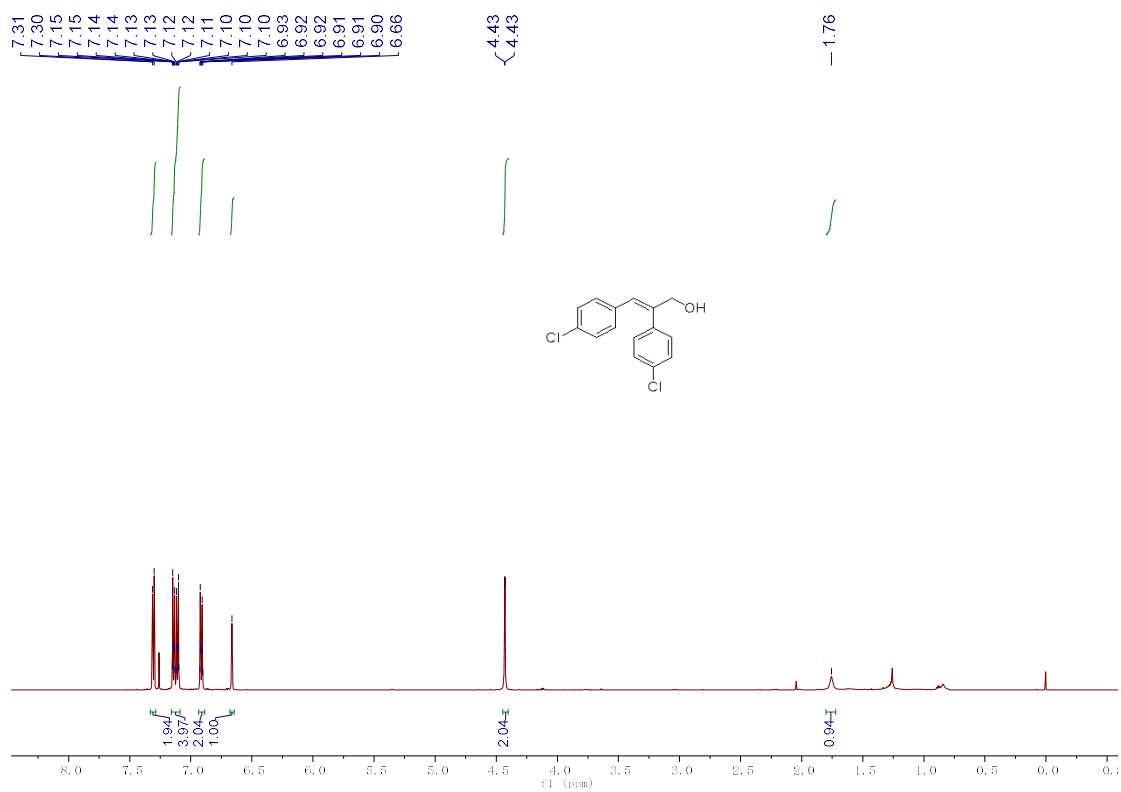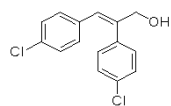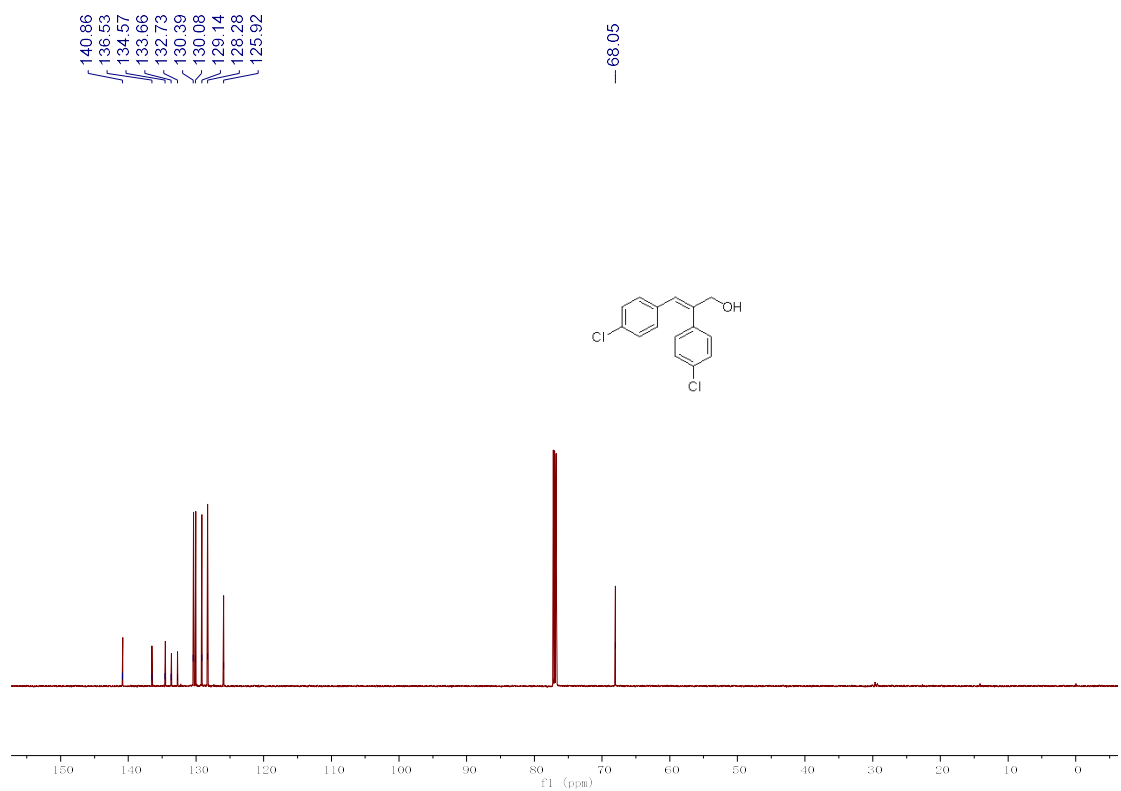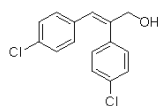

2v

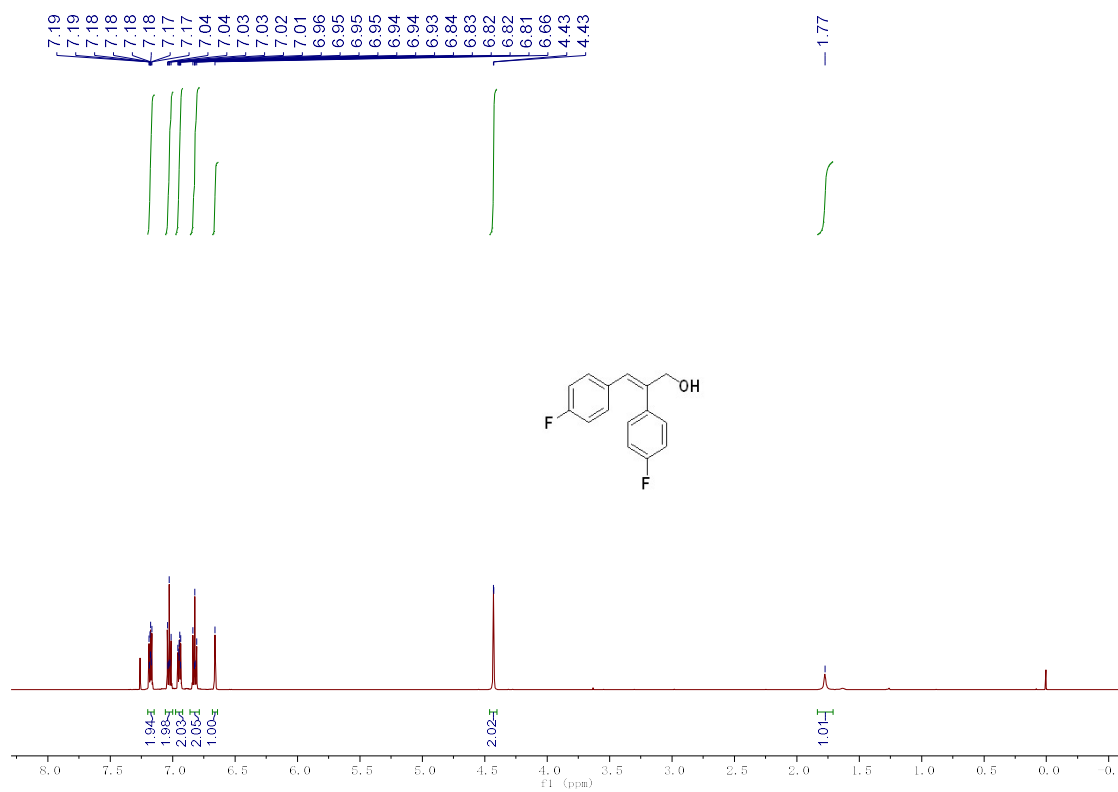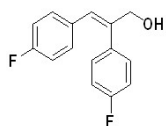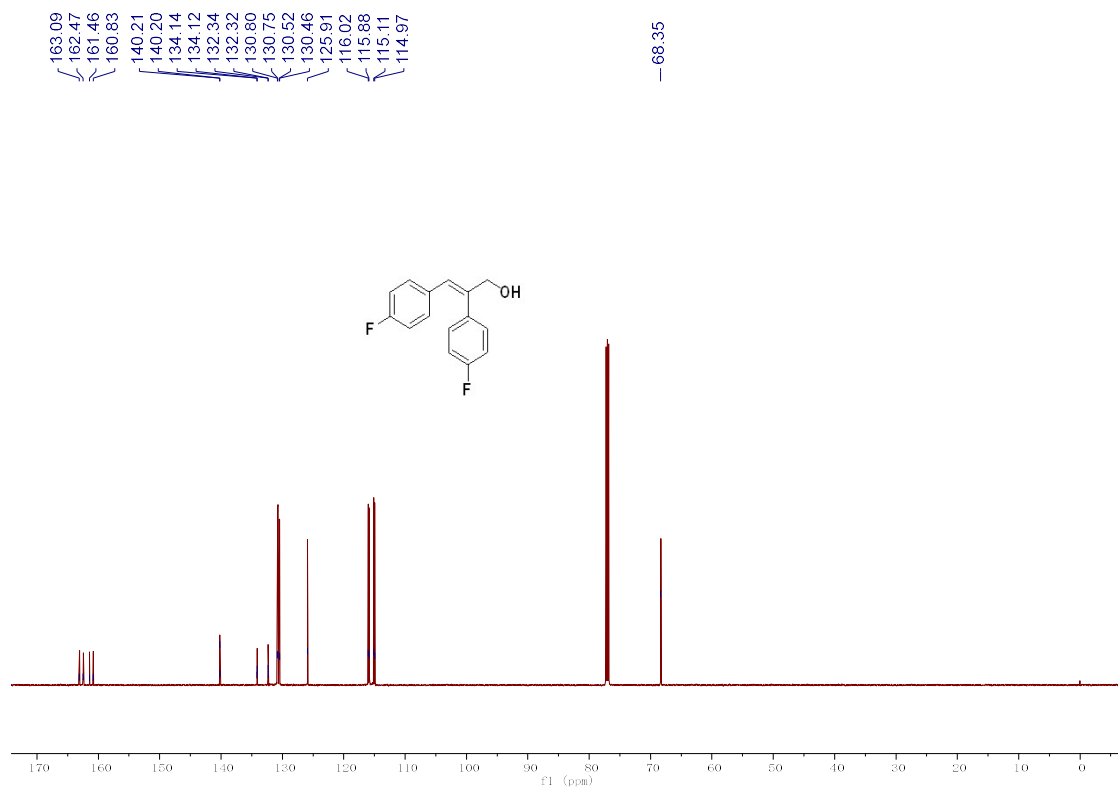

-114.07  
-114.08  
-114.09  
-114.10  
-114.11  
-114.12  
-114.12  
-114.60  
-114.61  
-114.61  
-114.62  
-114.63  
-114.64  
-114.65

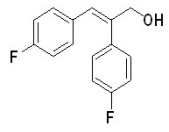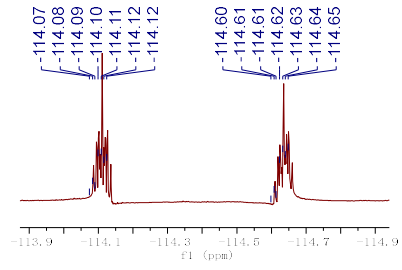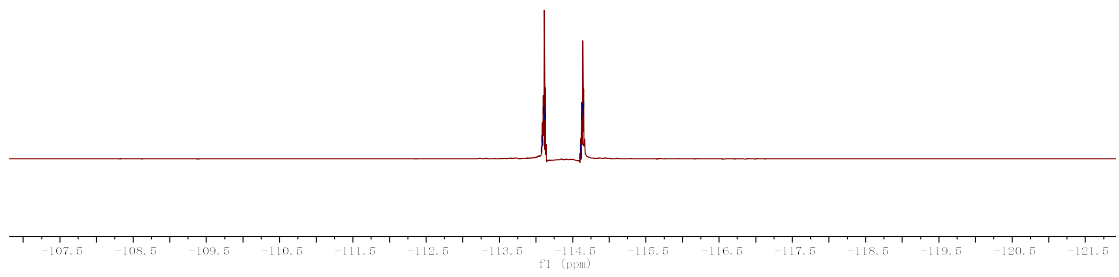

2w

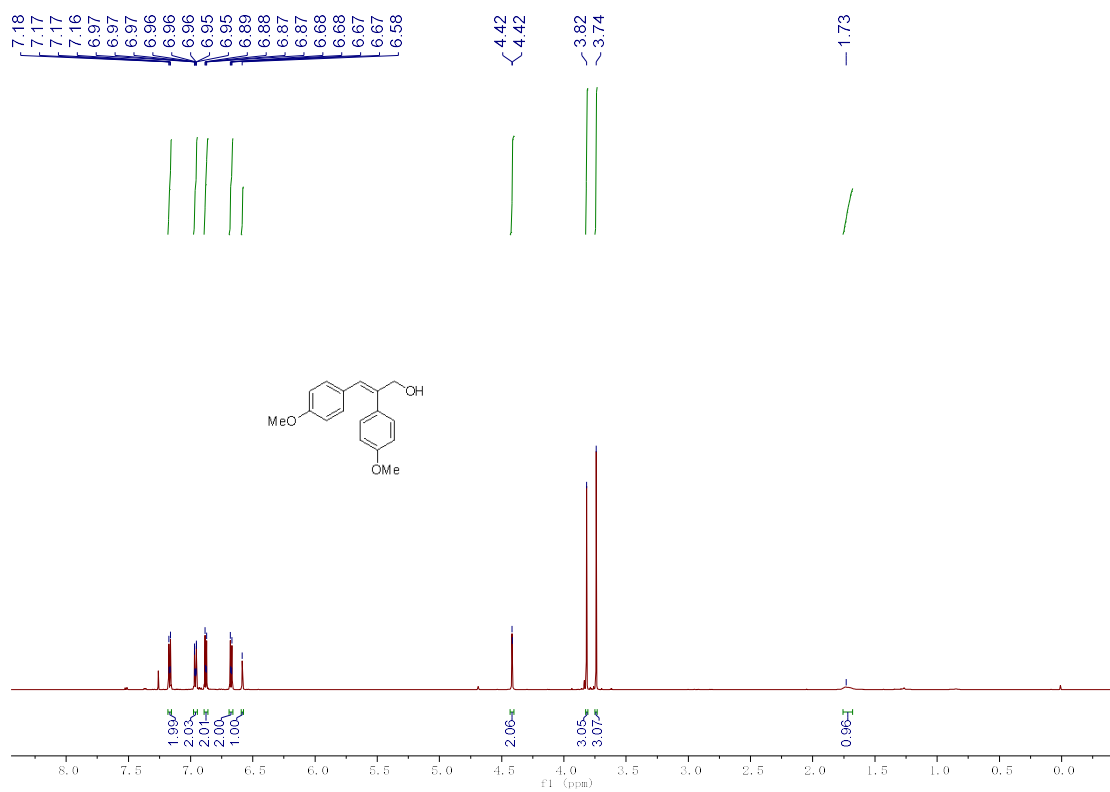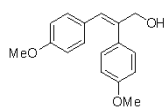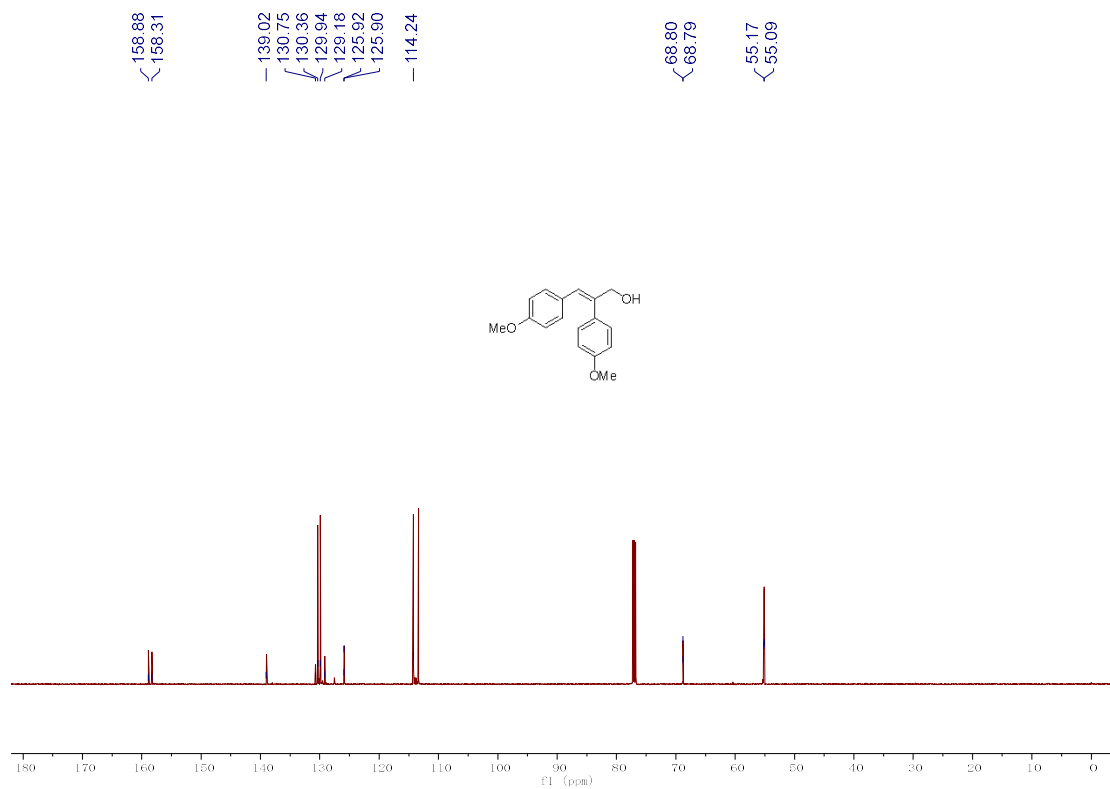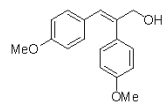

2x

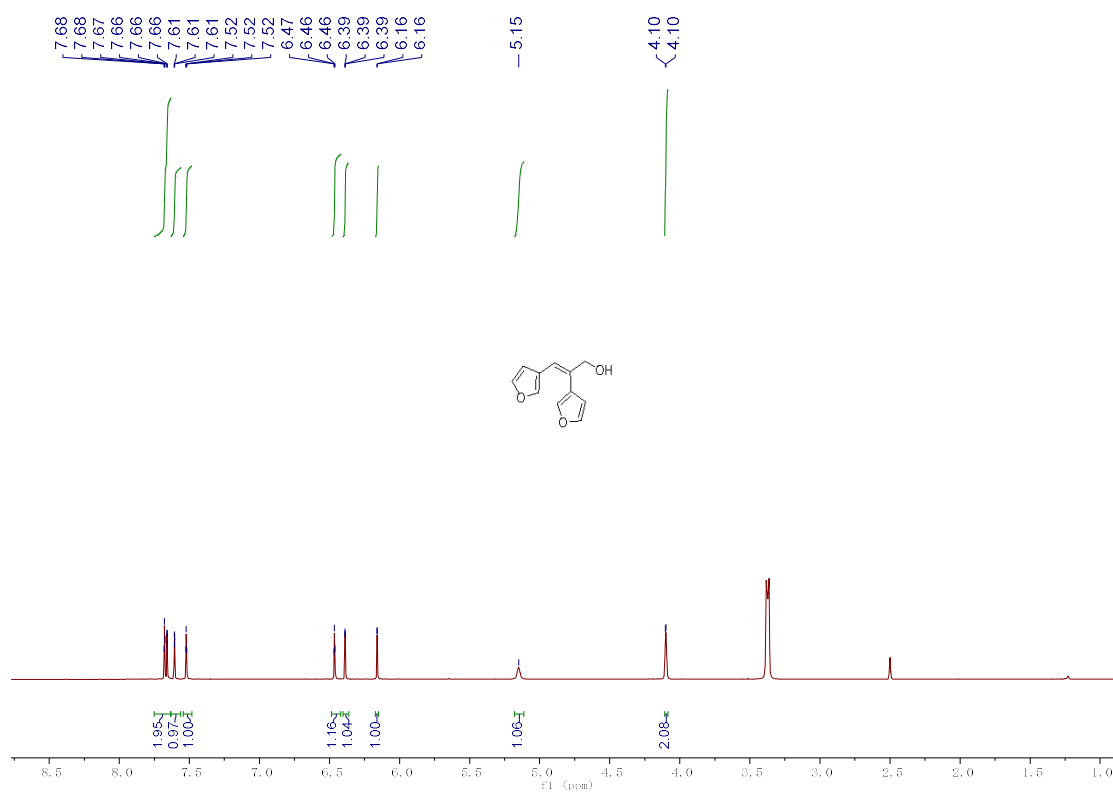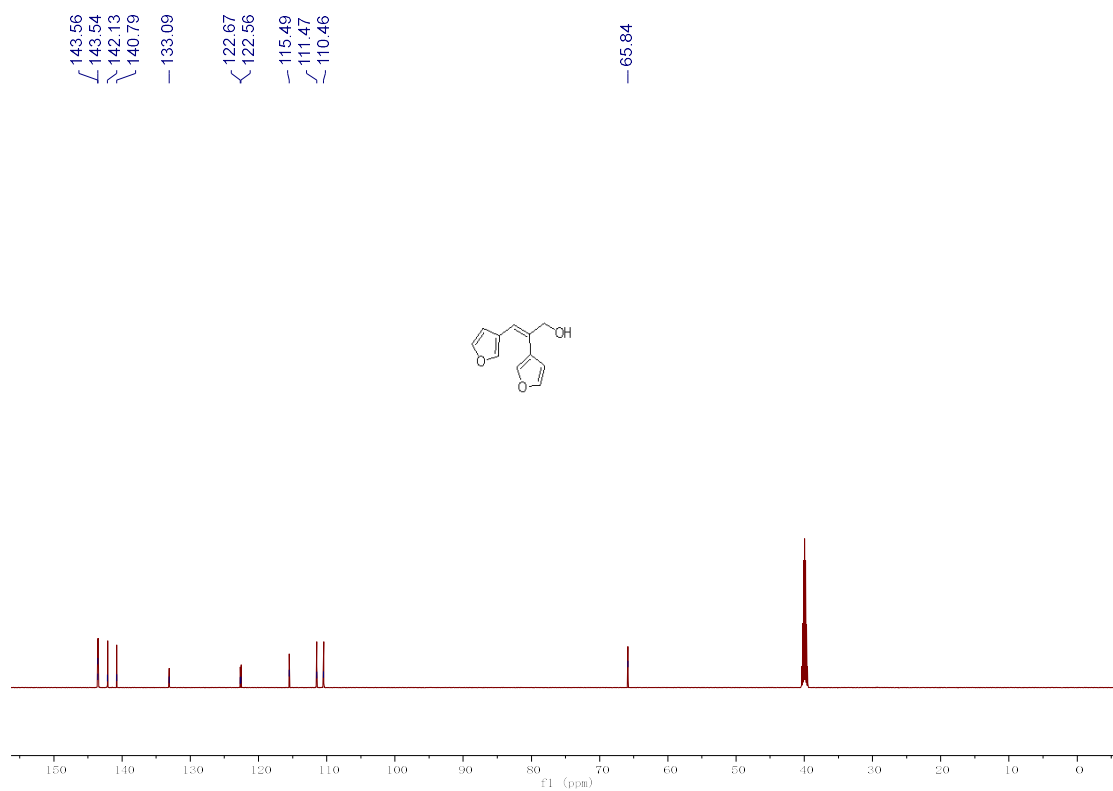



2y

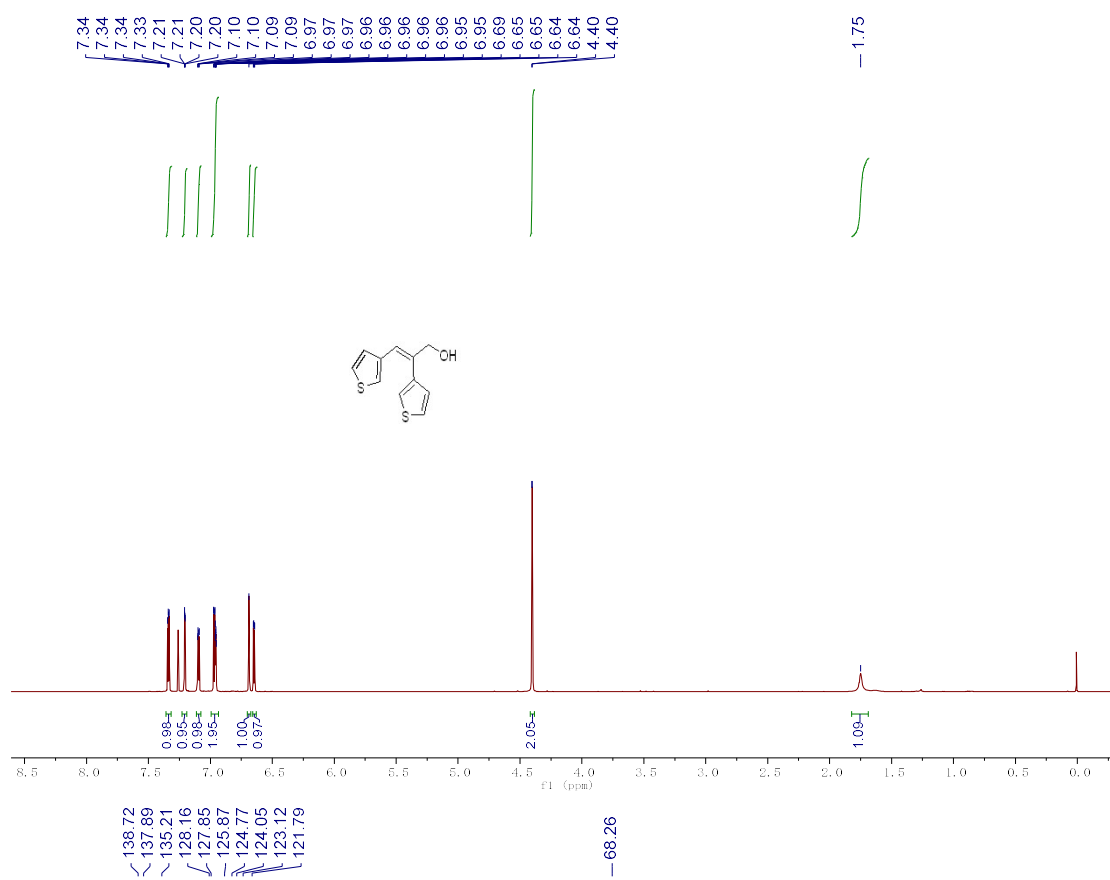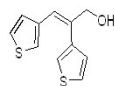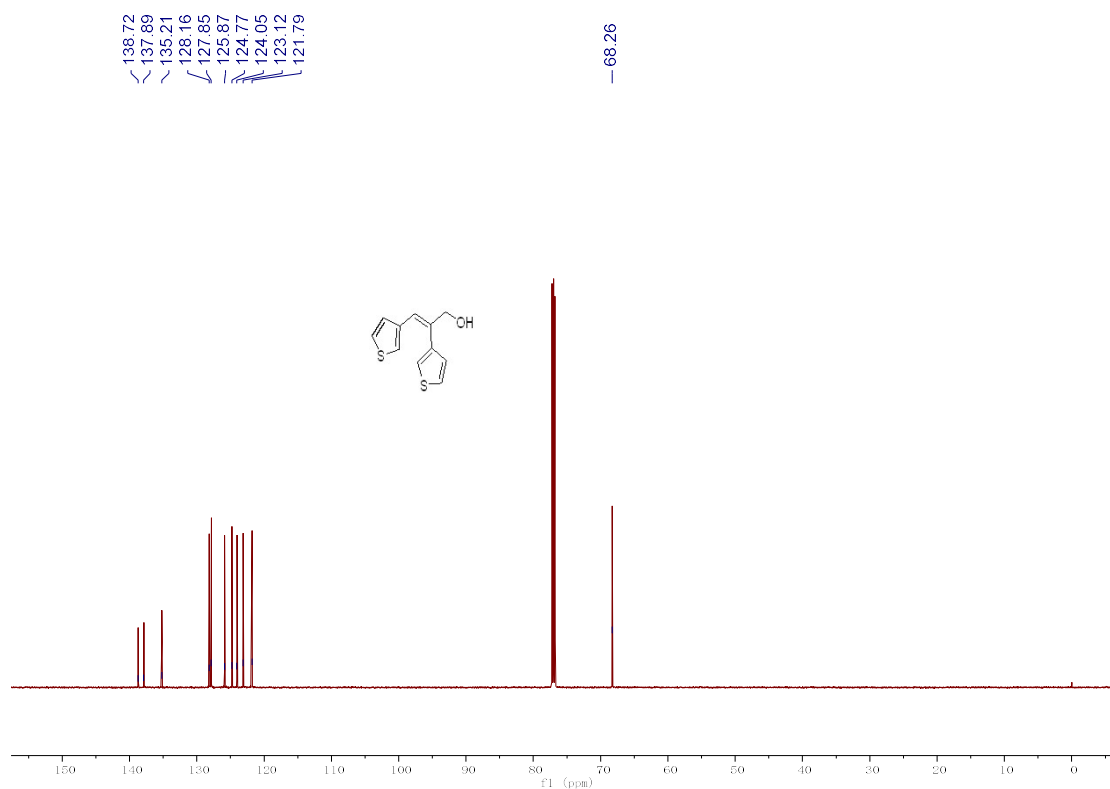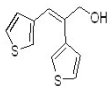

2z

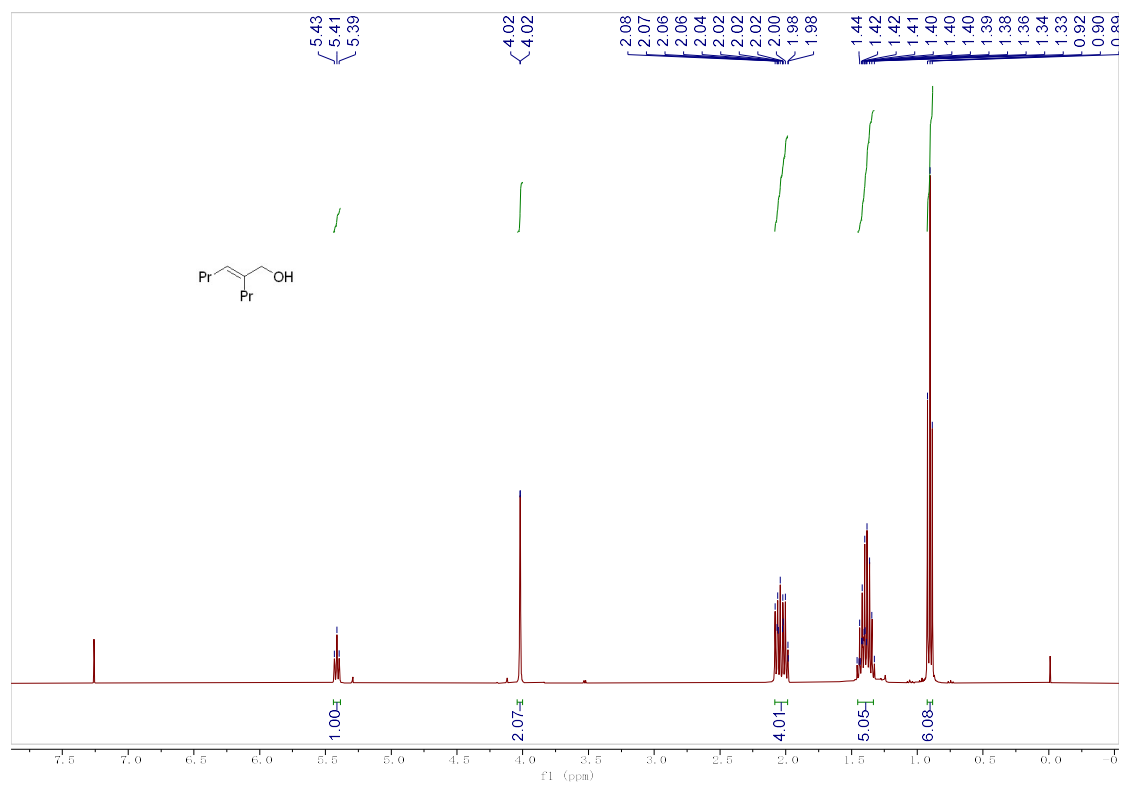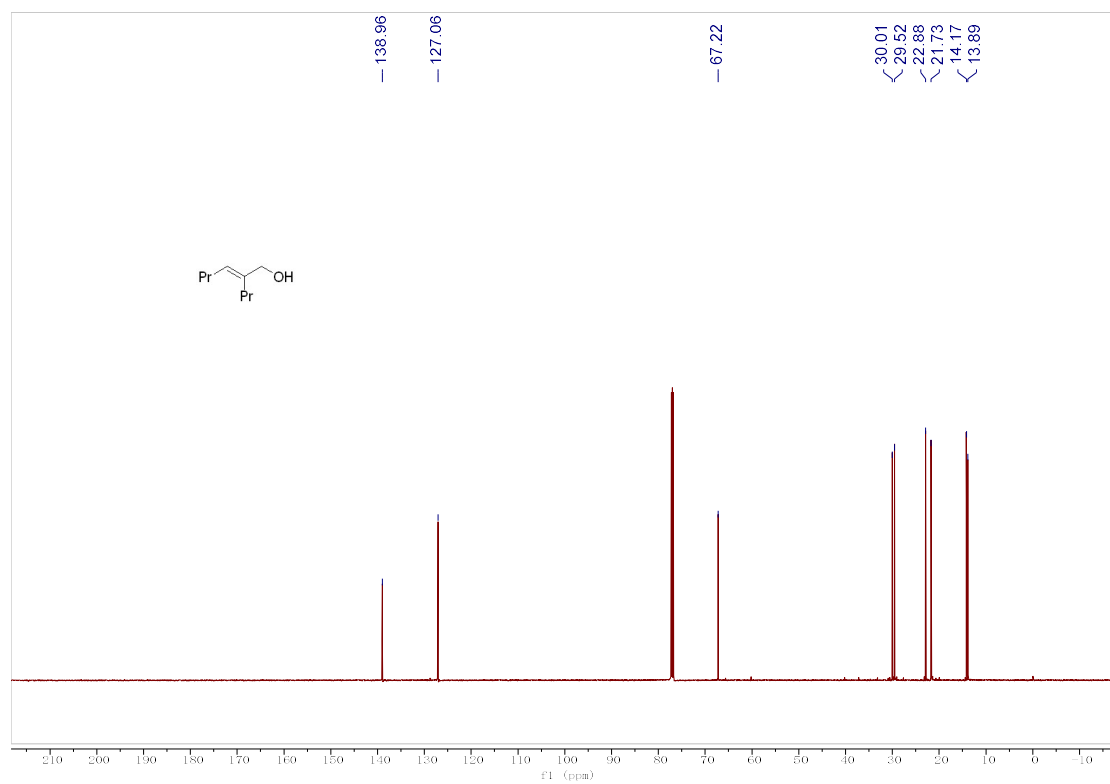

2aa

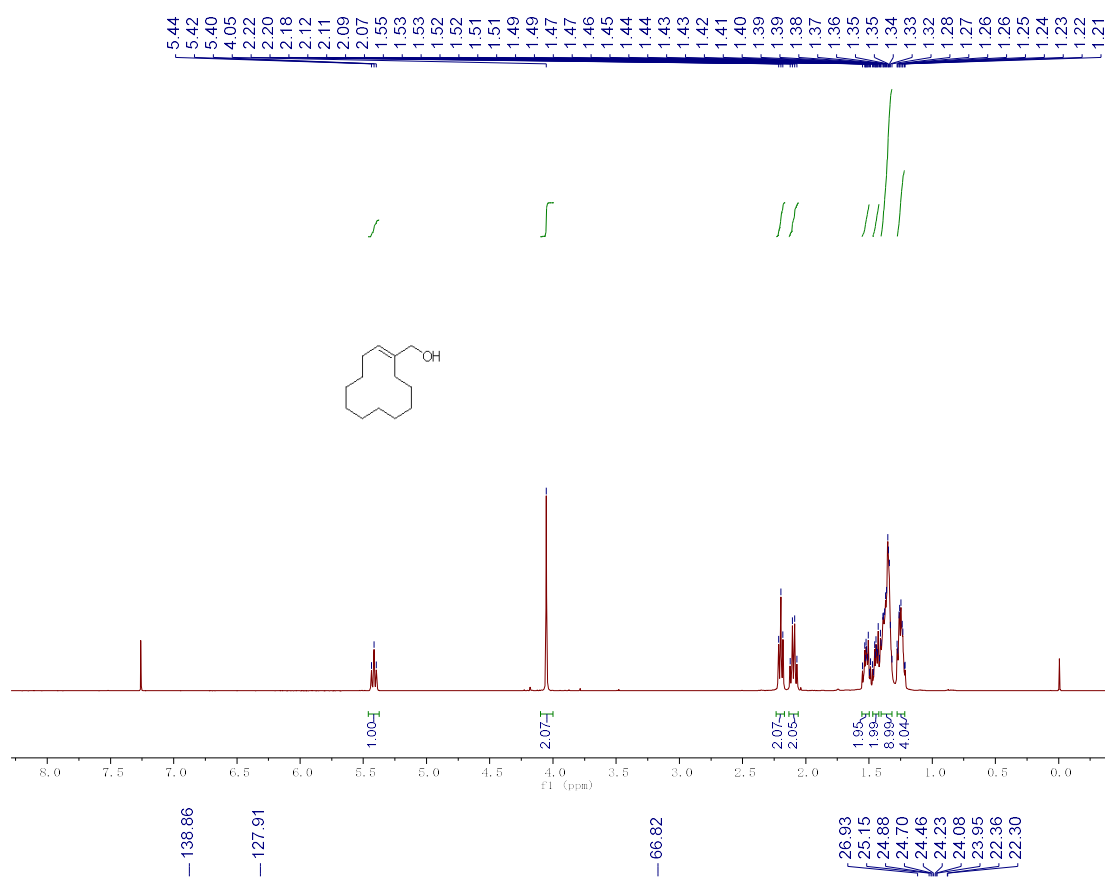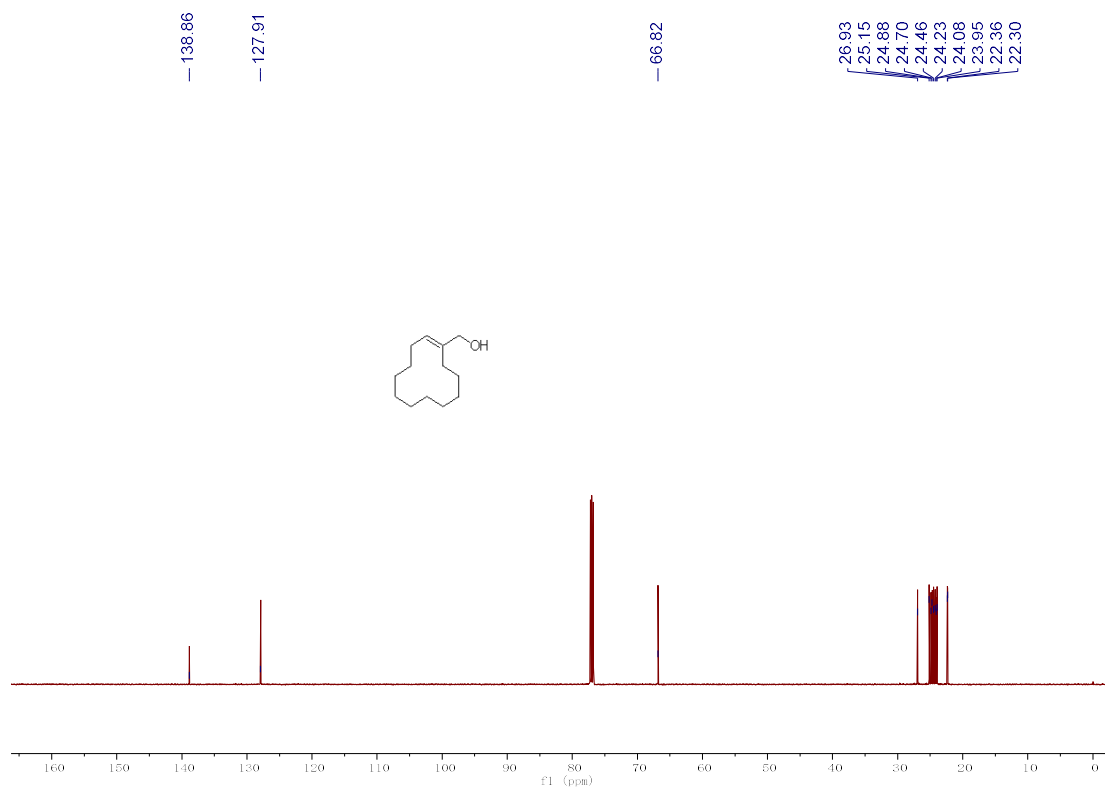

2ab

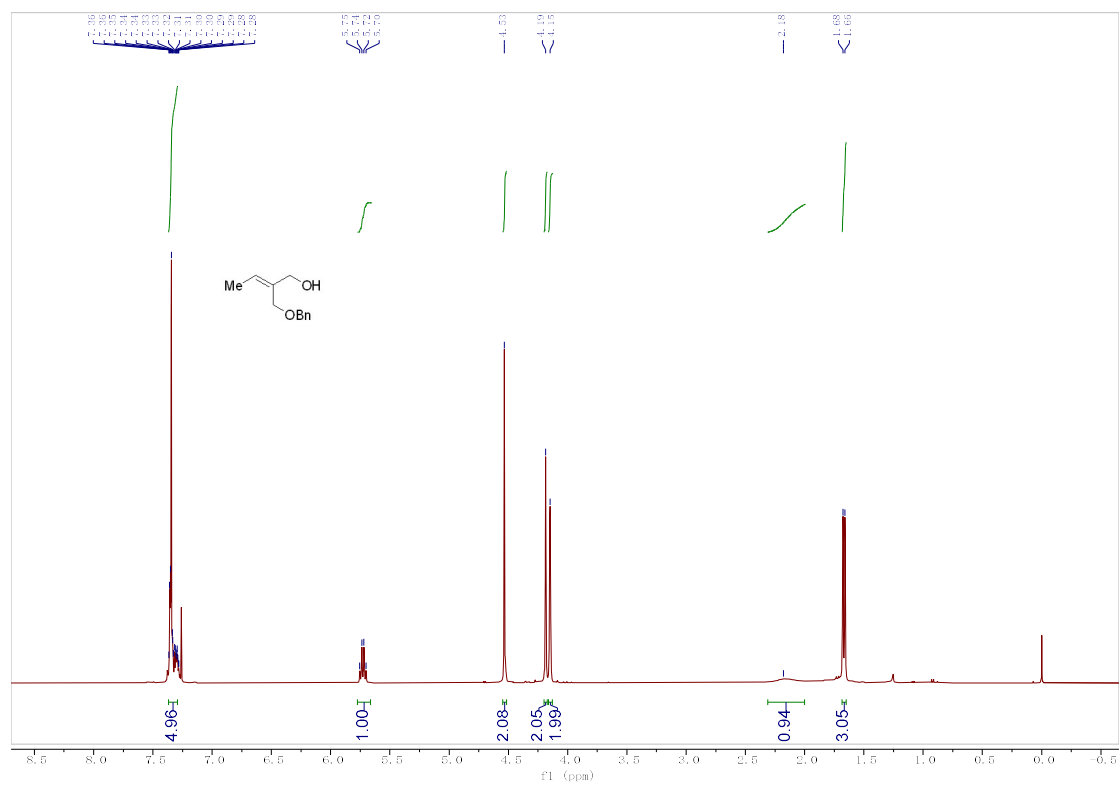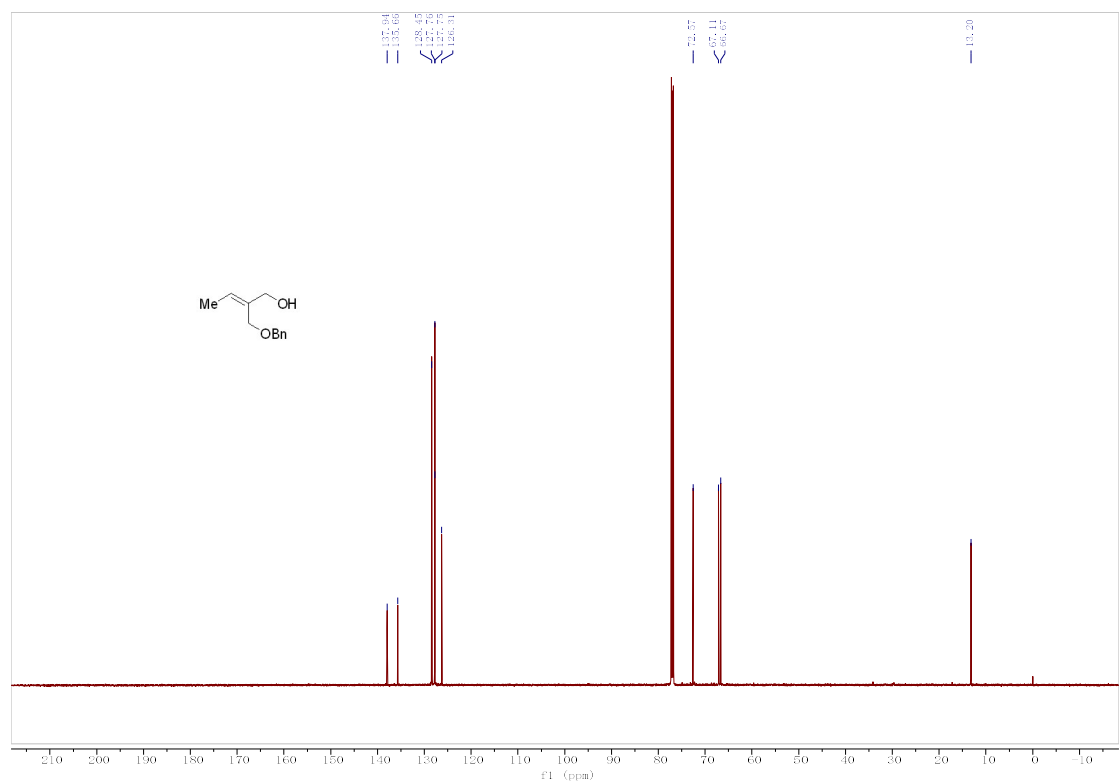

2ac

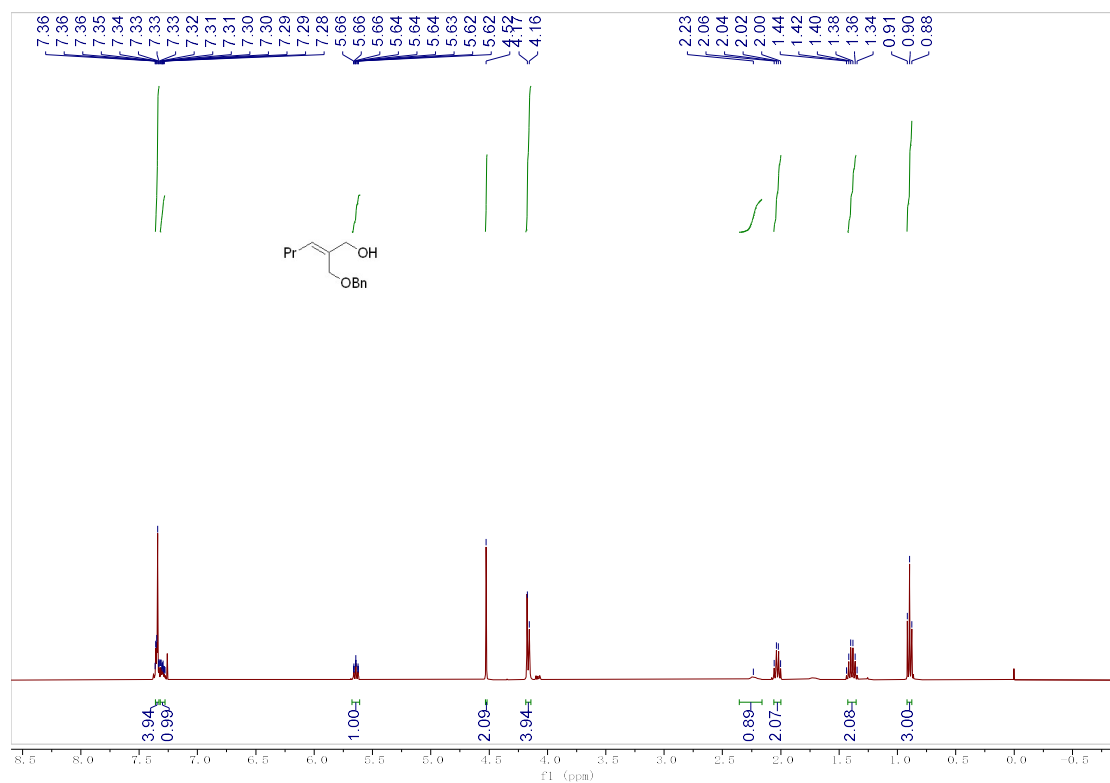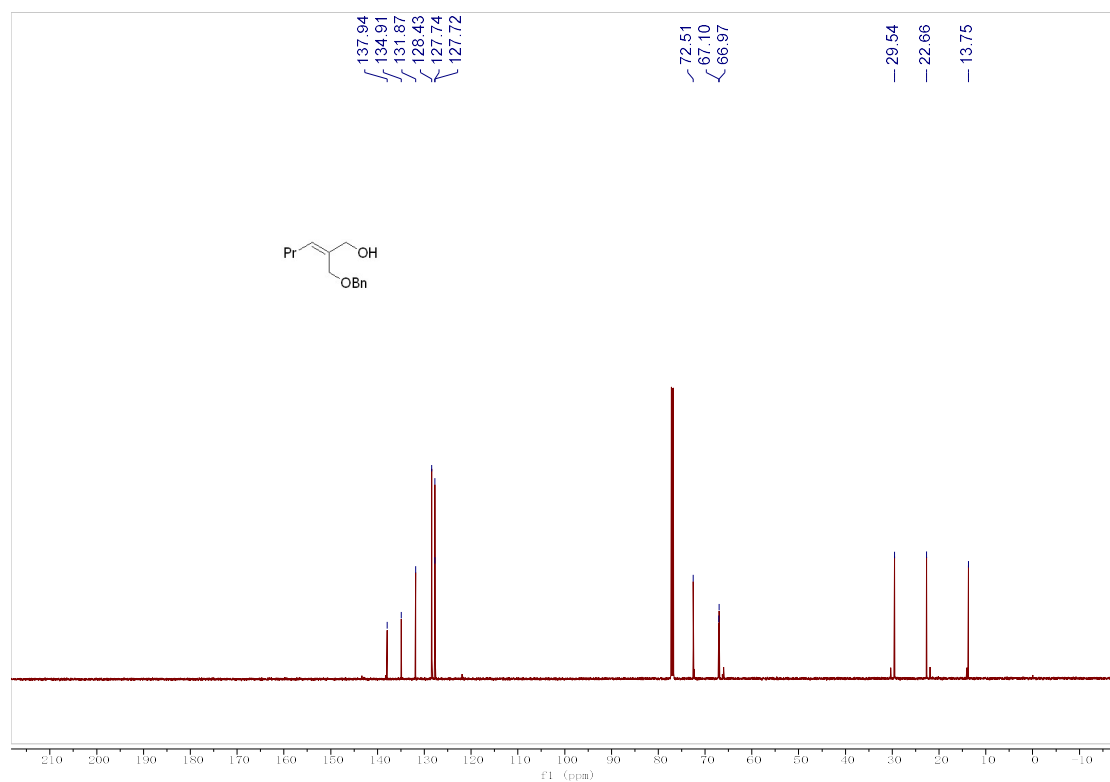

2ad

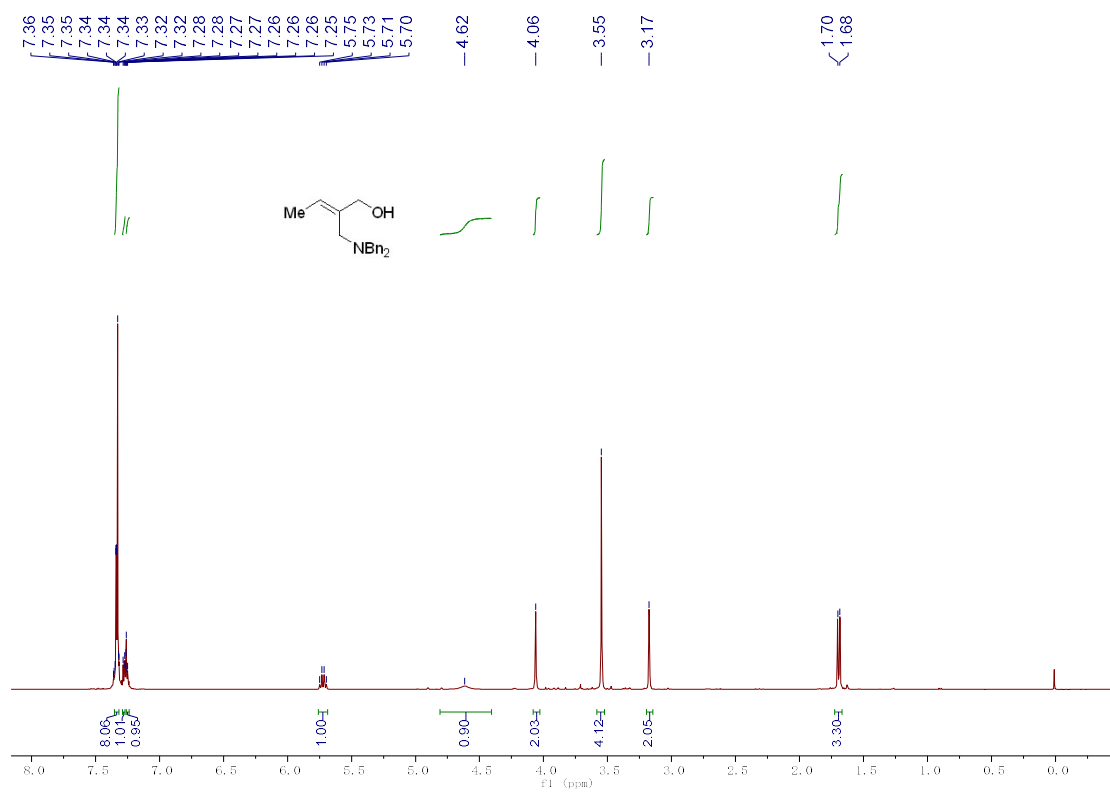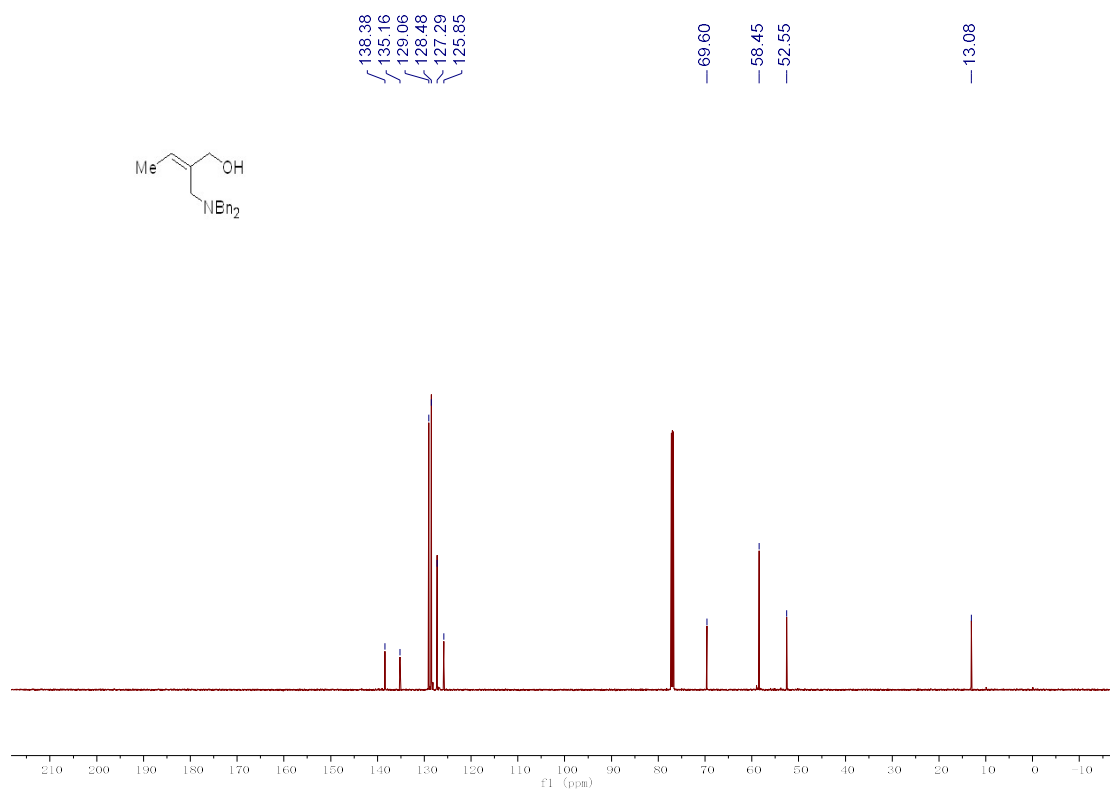

2ae

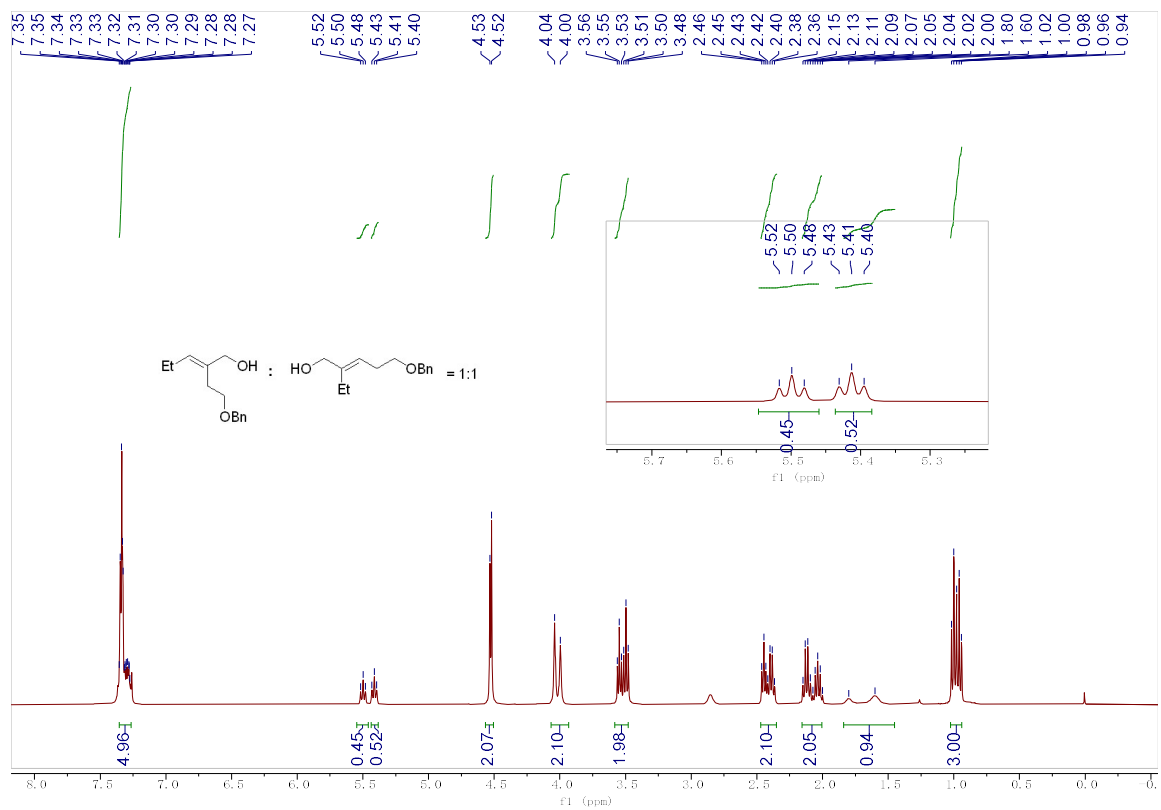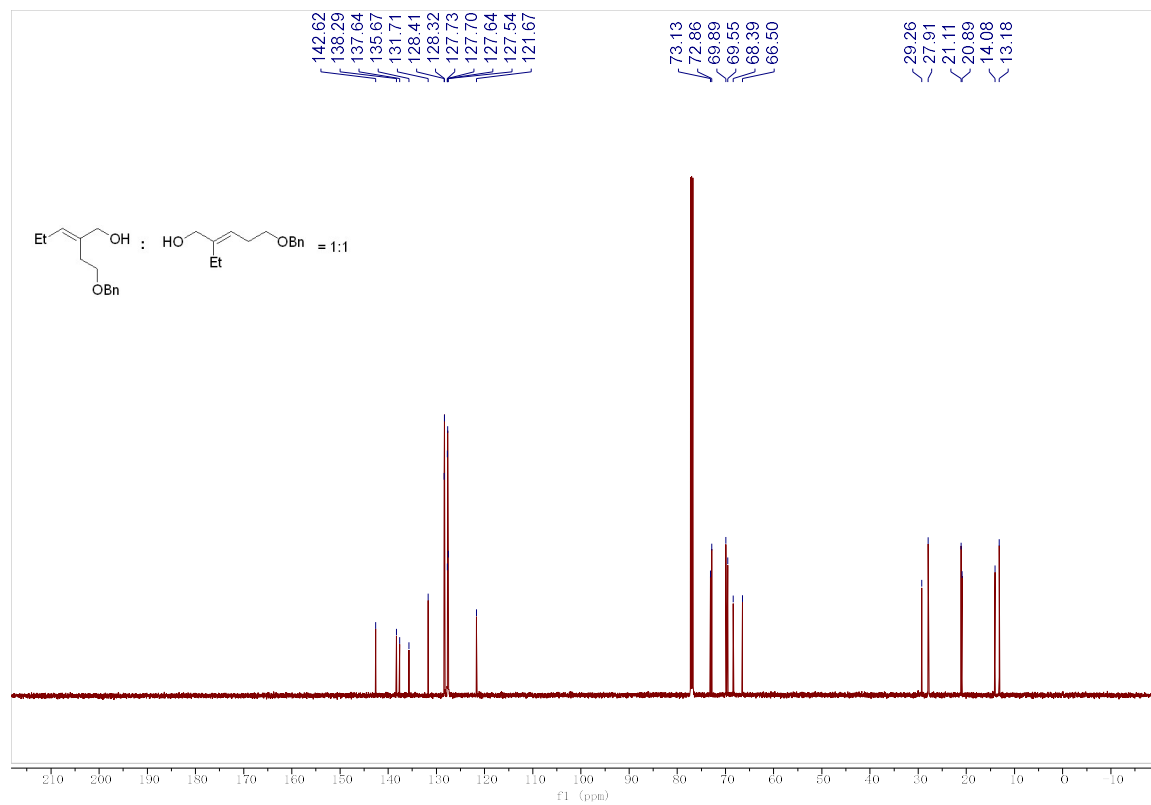

2af

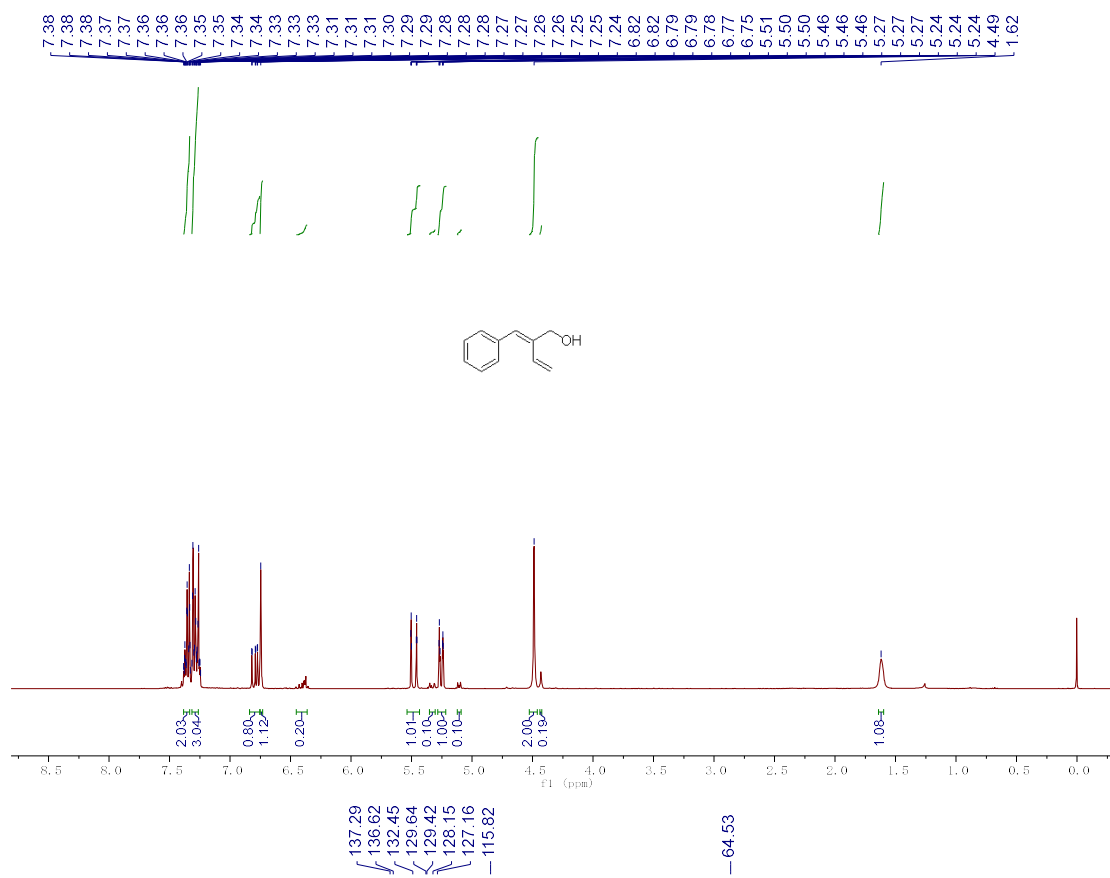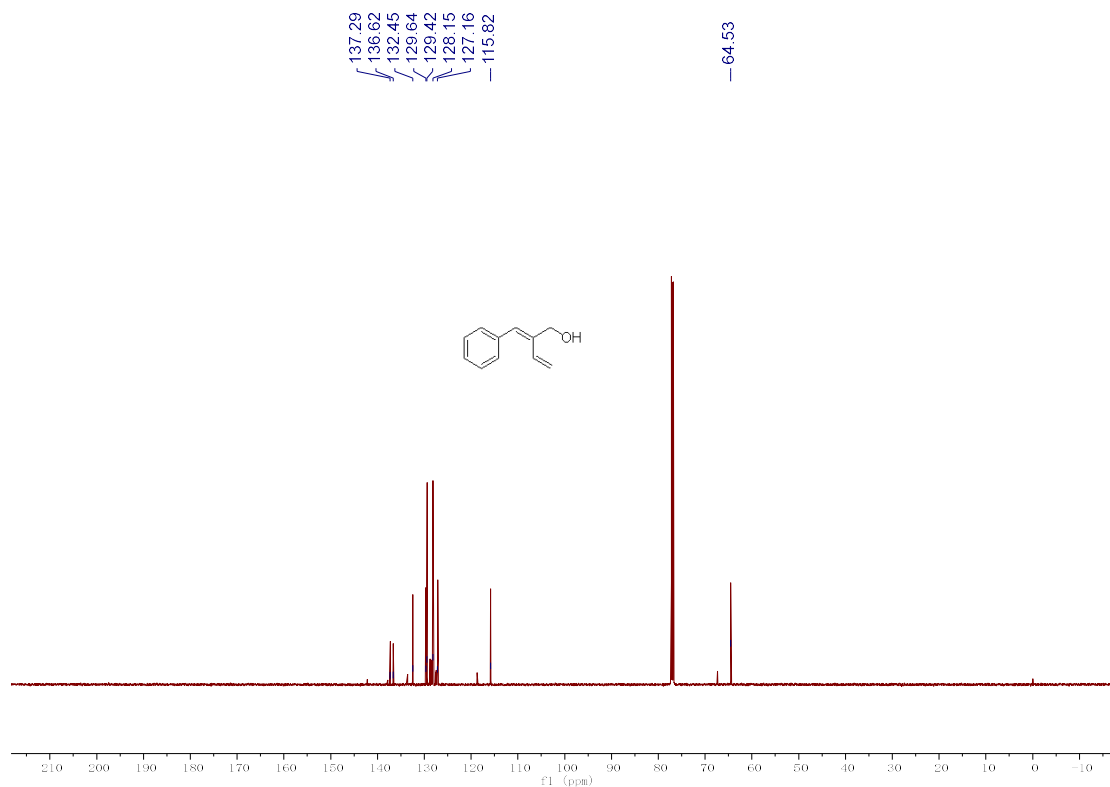



2ag

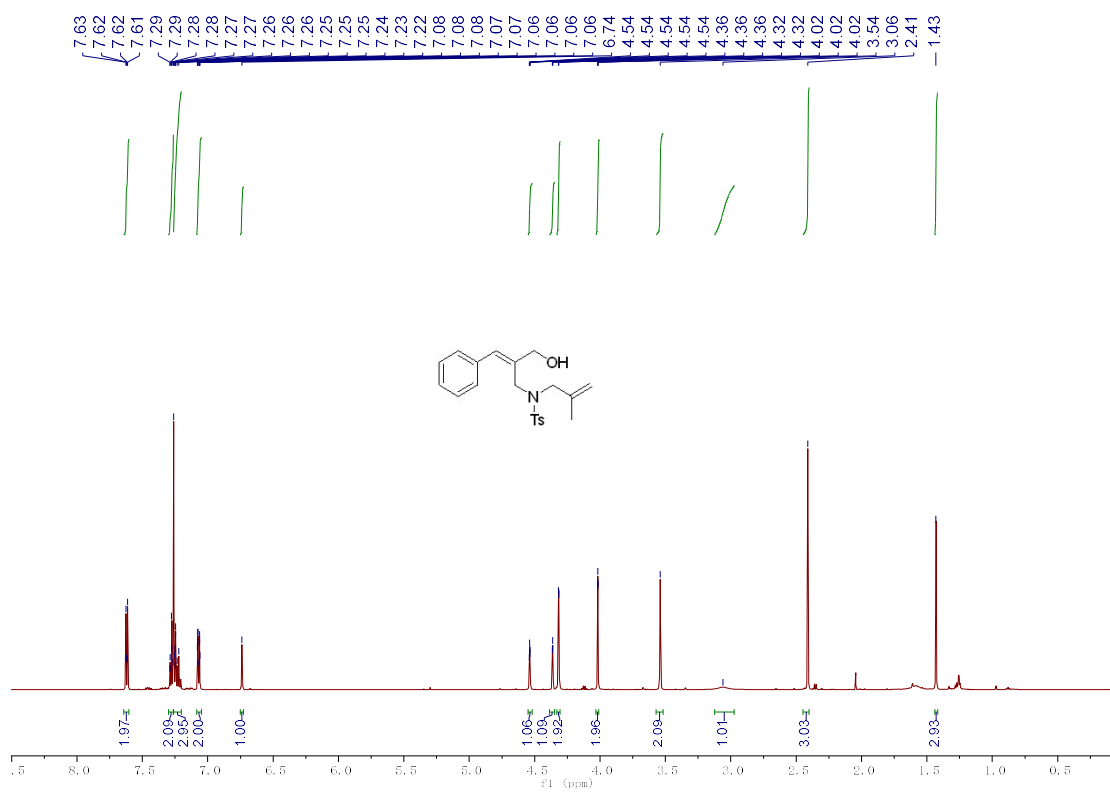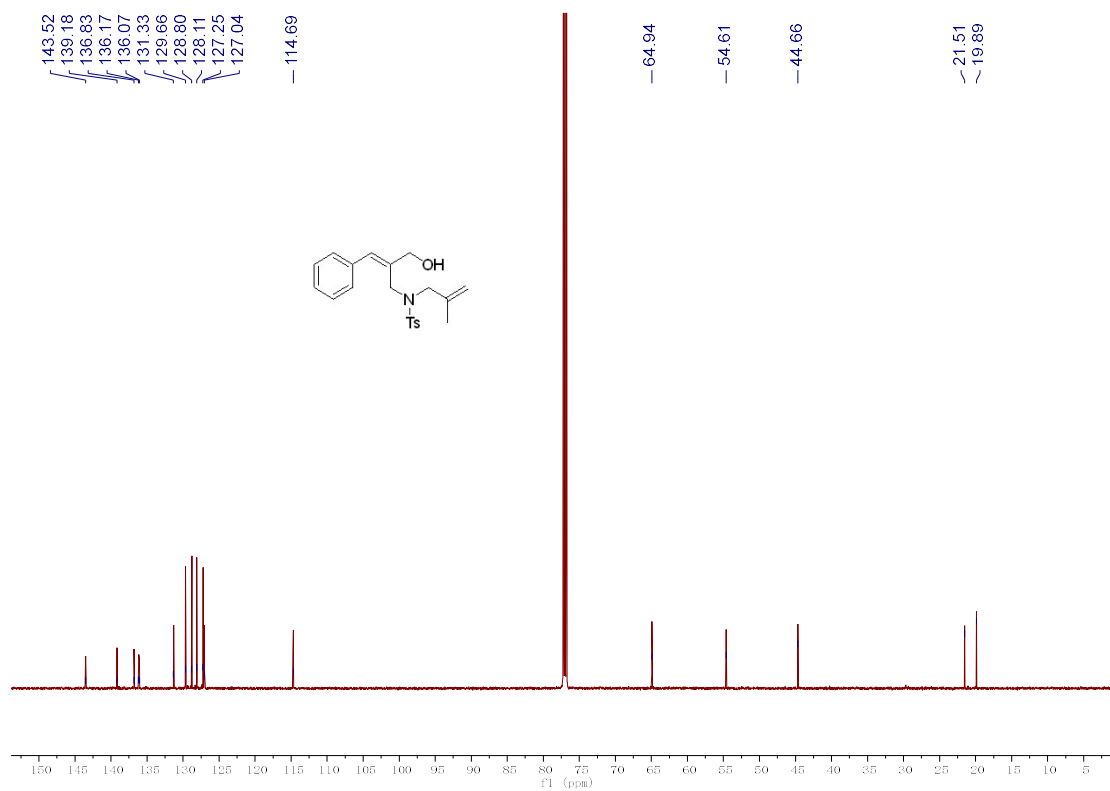

7a

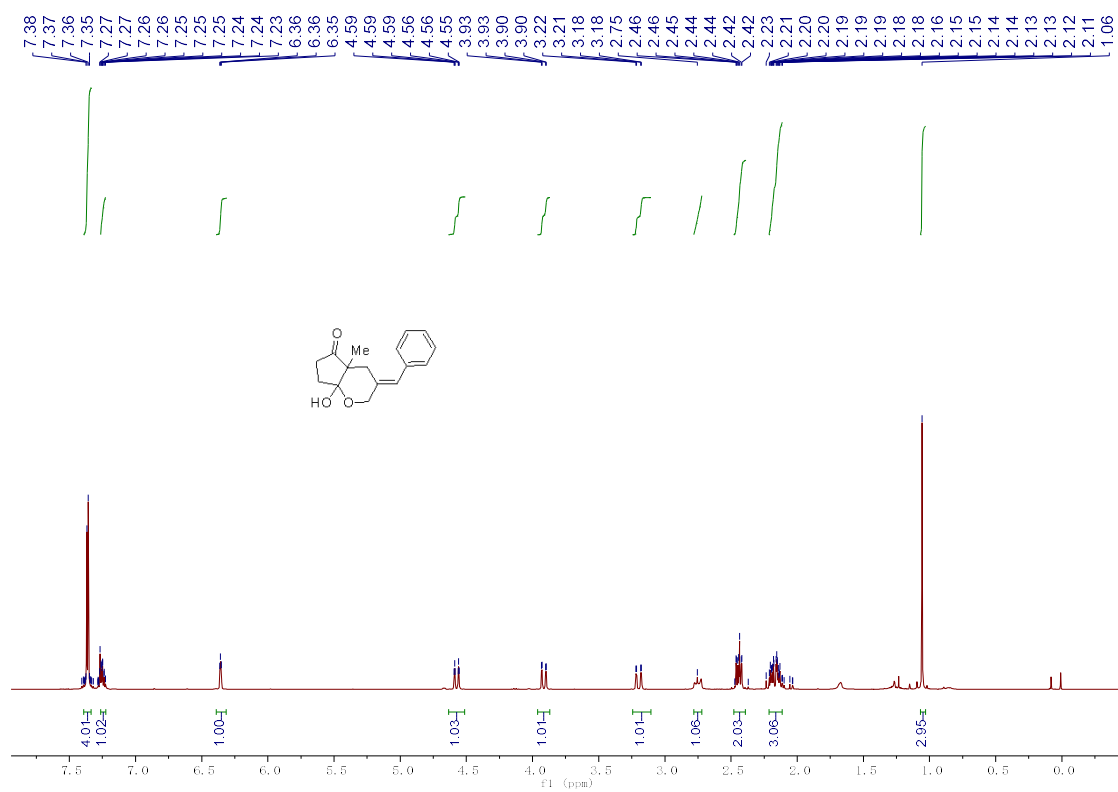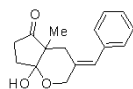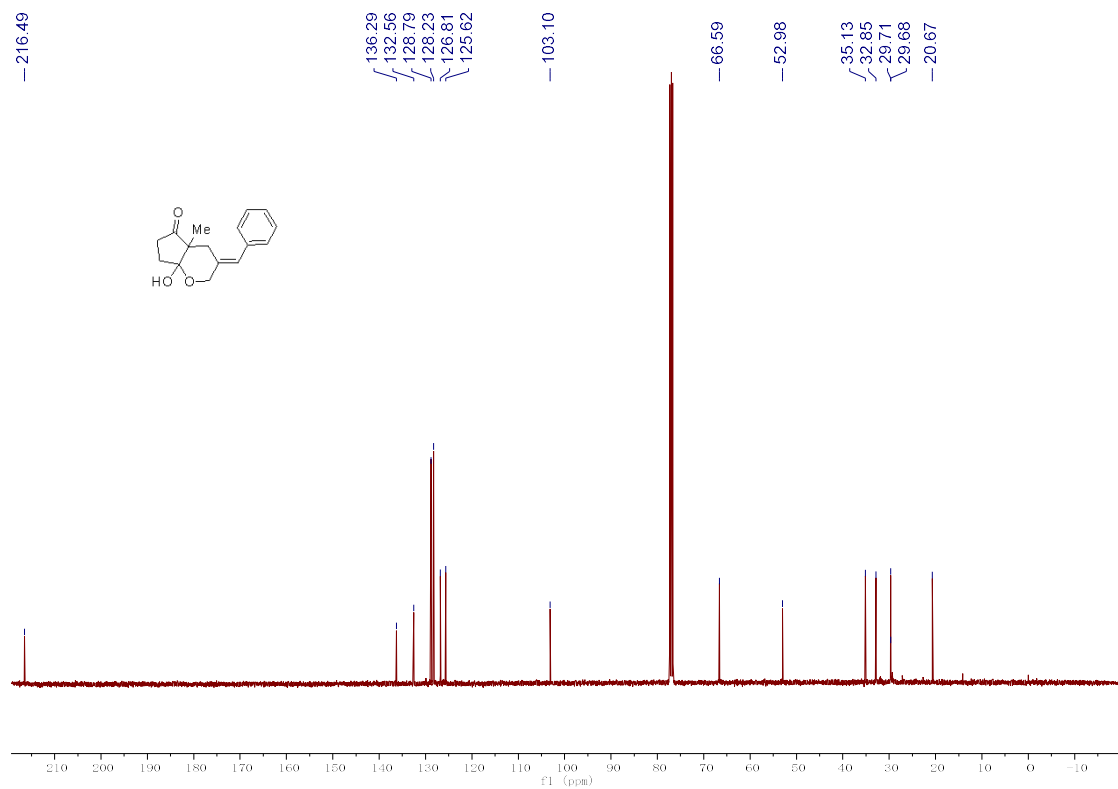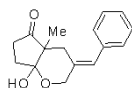

7b

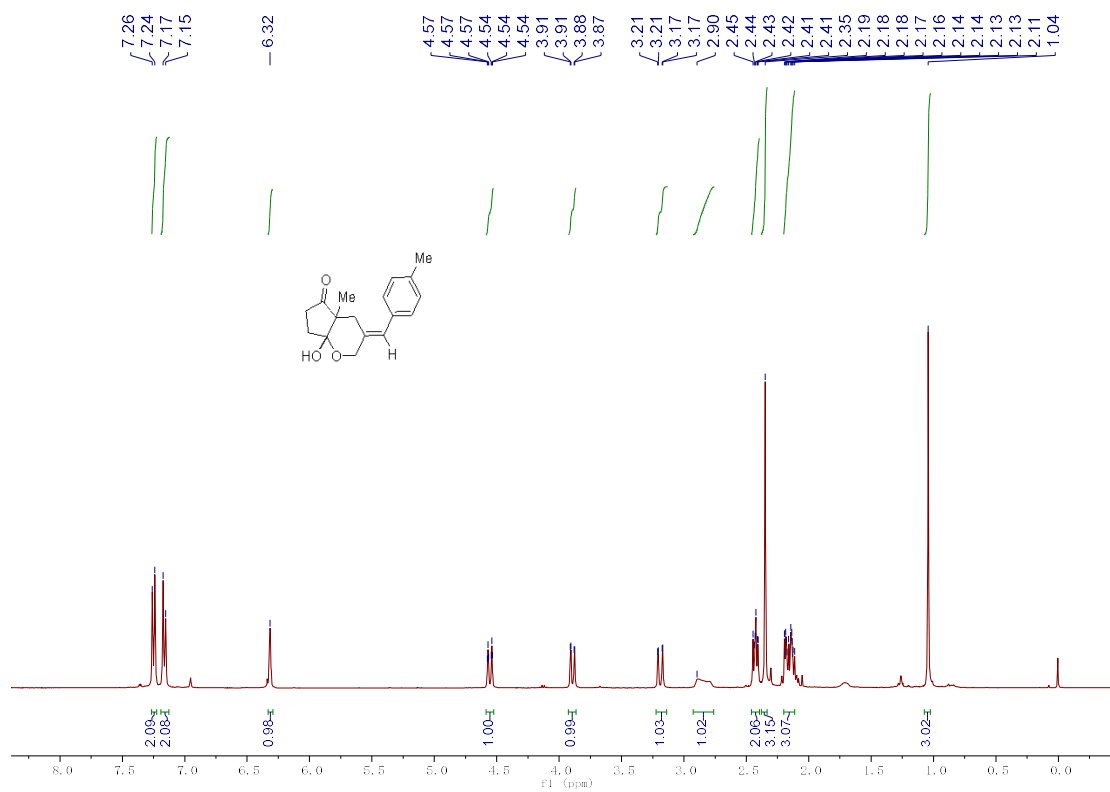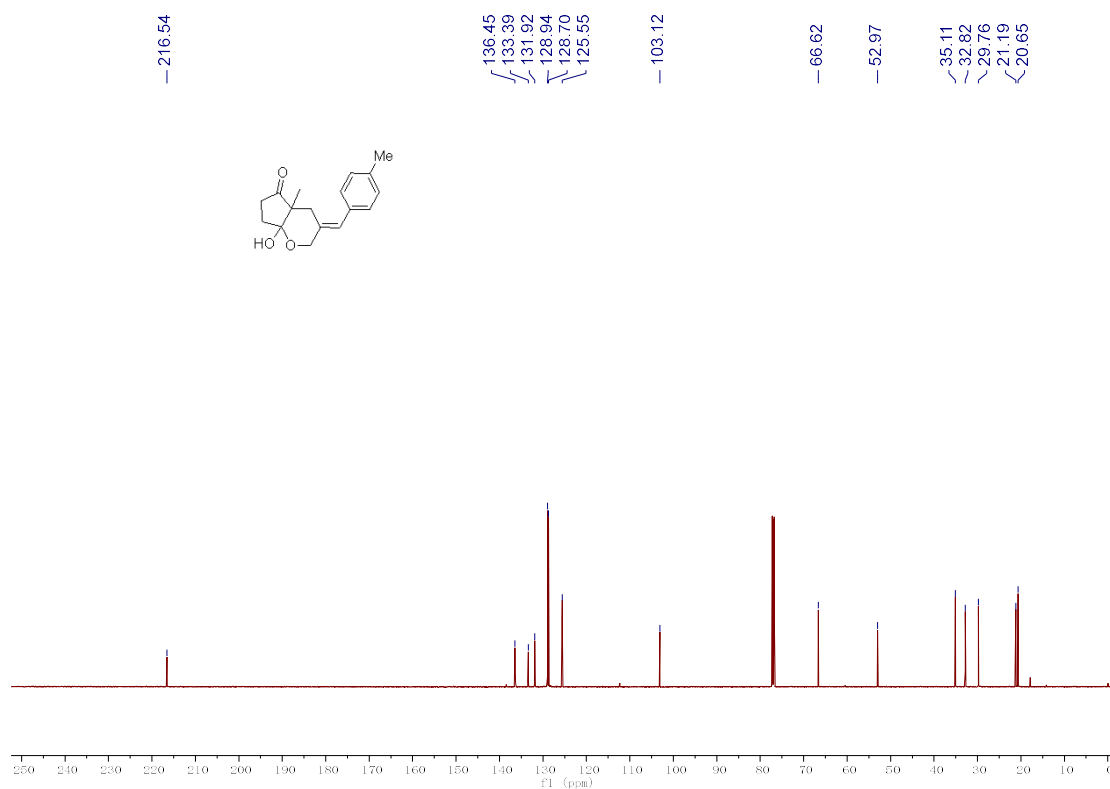

7c

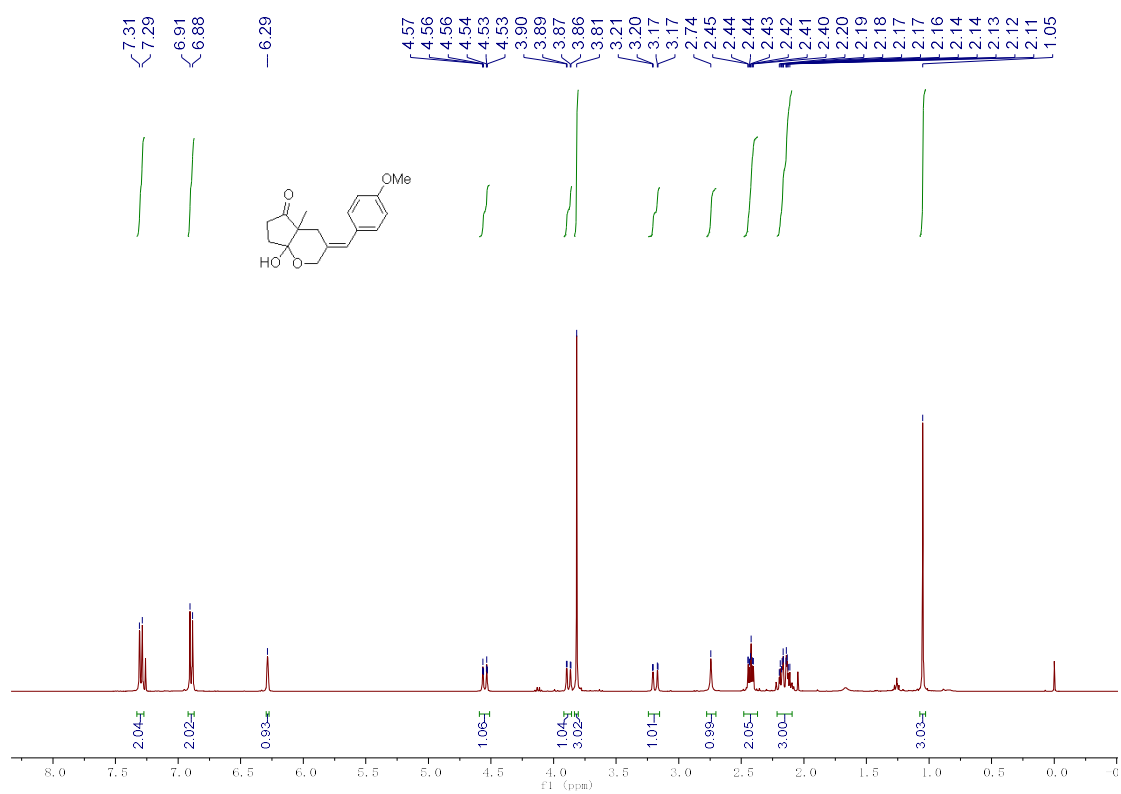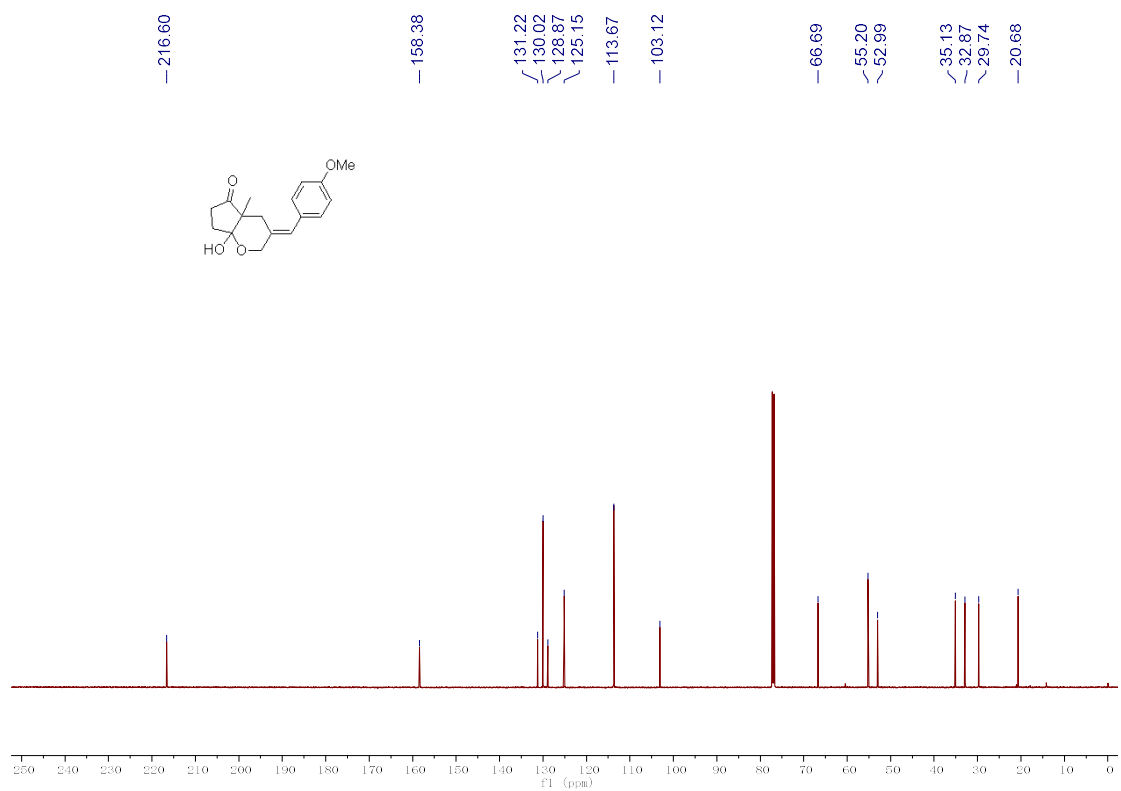

7d

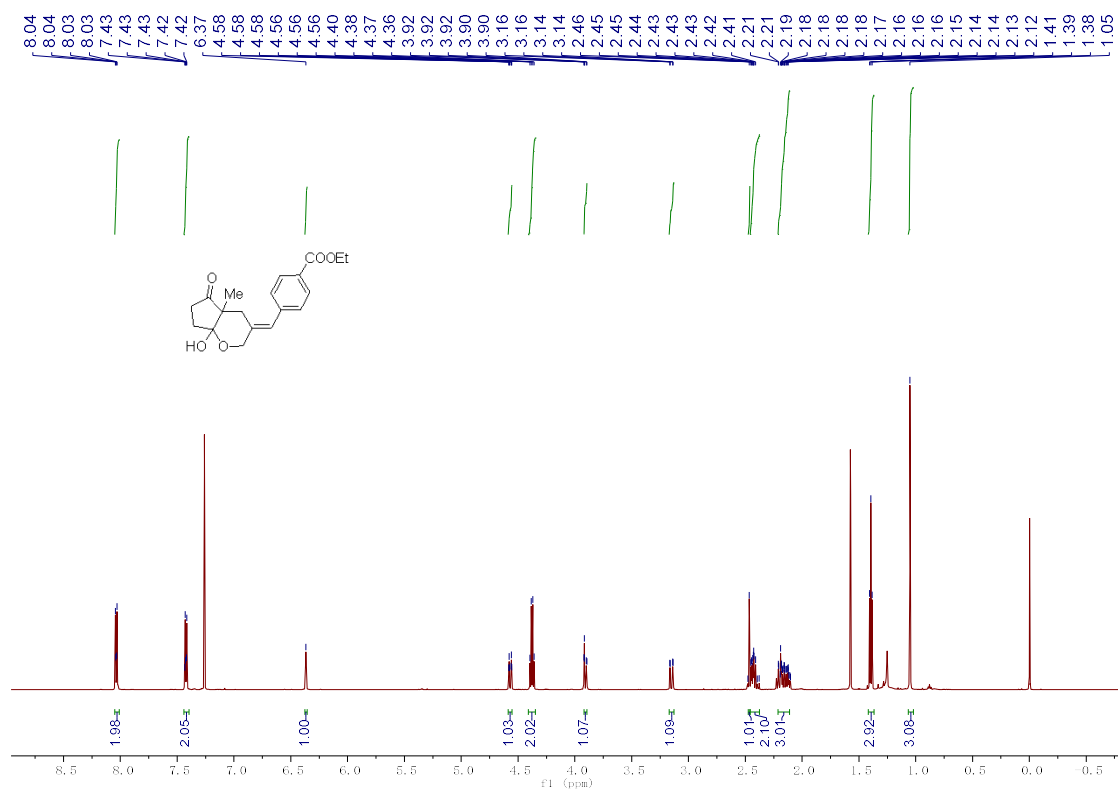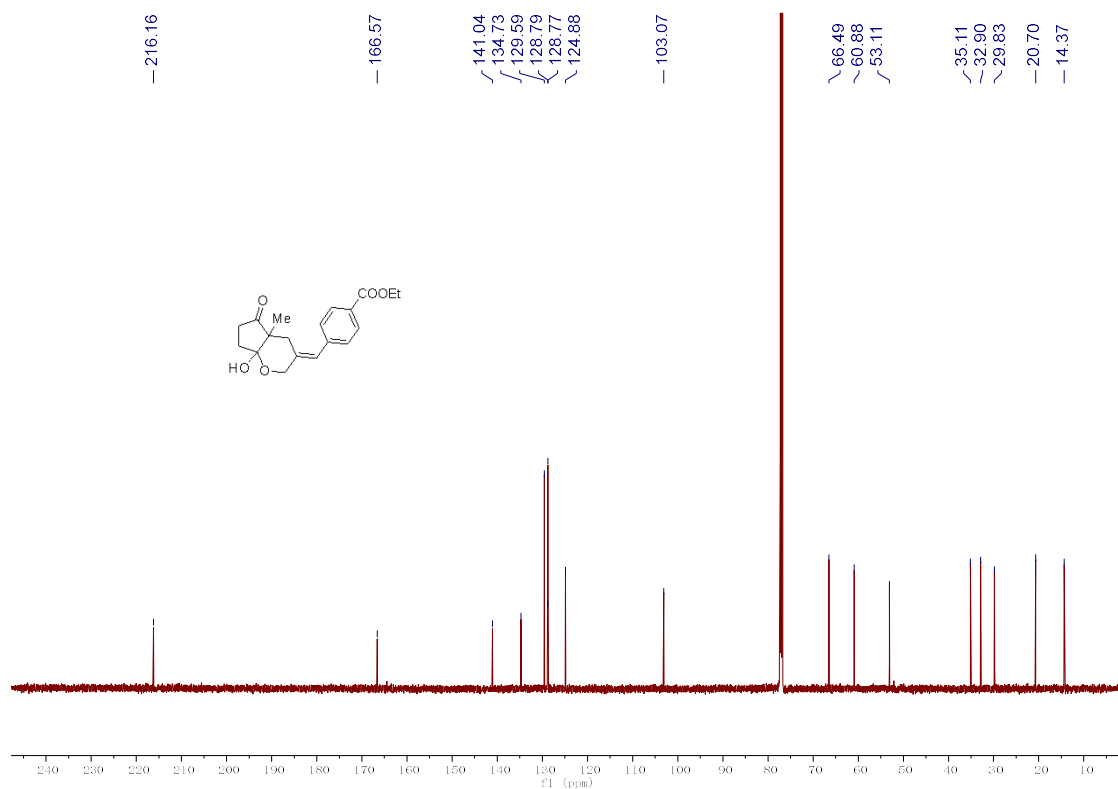

7e

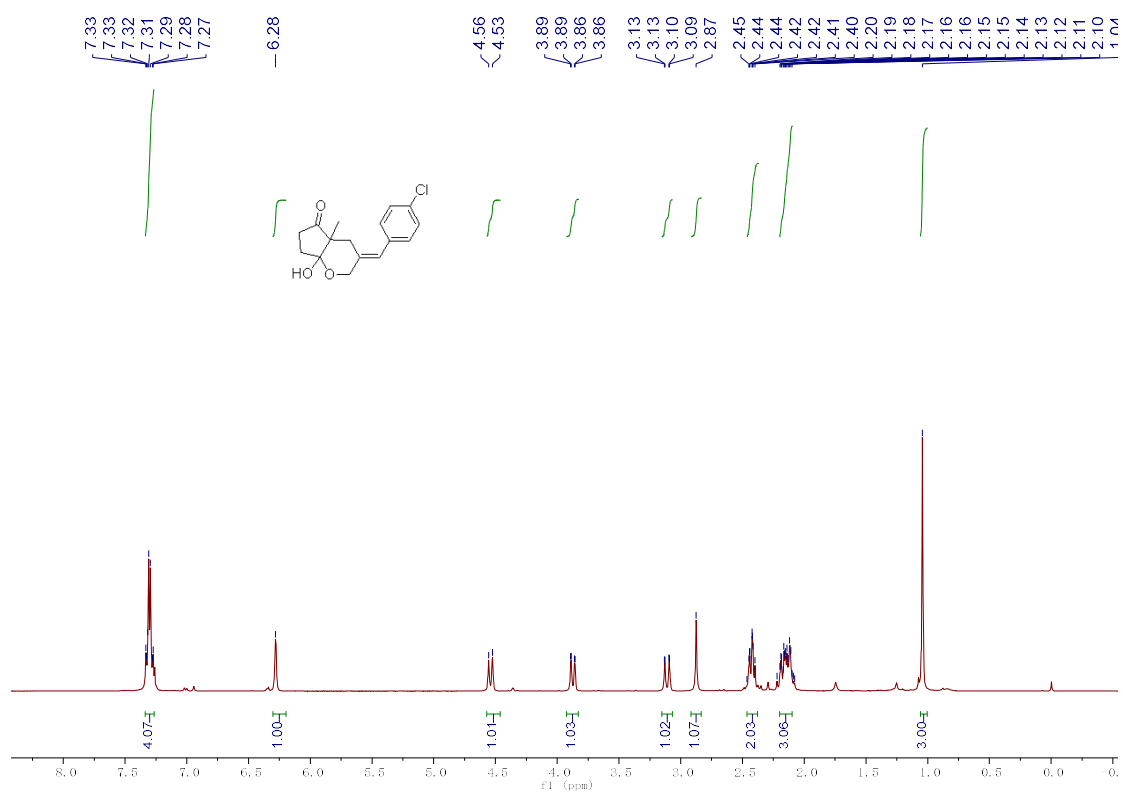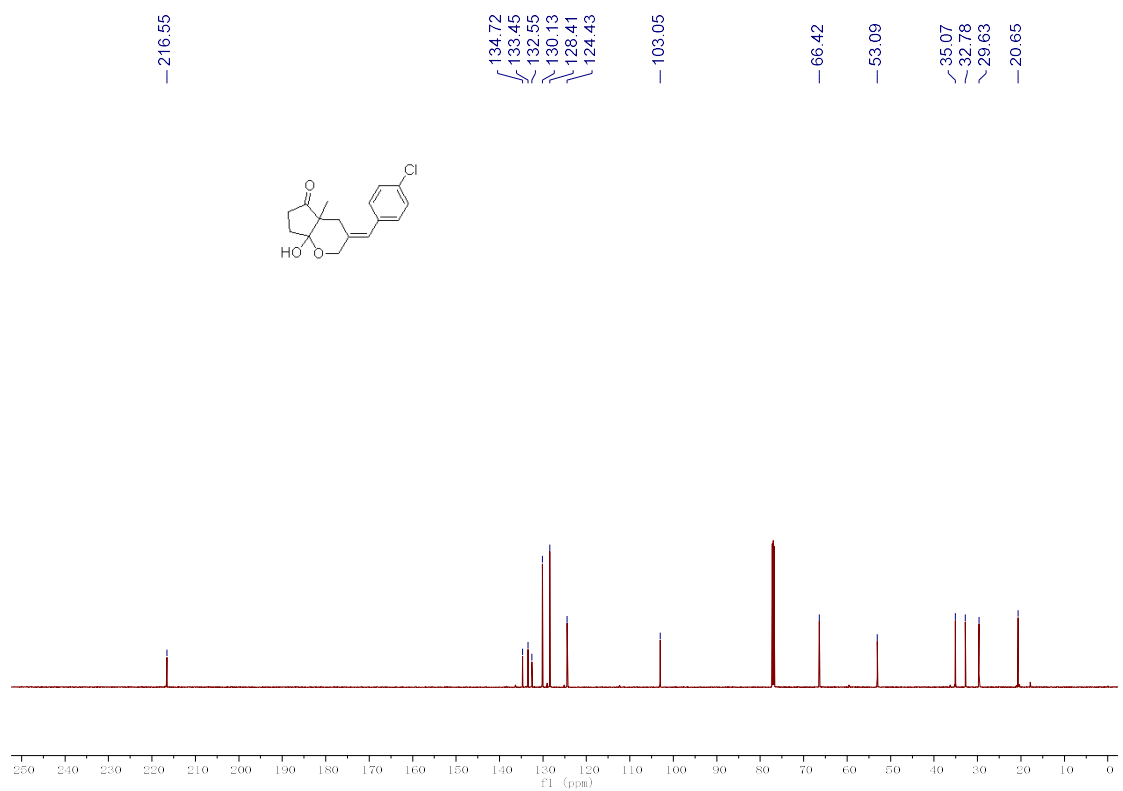

7f

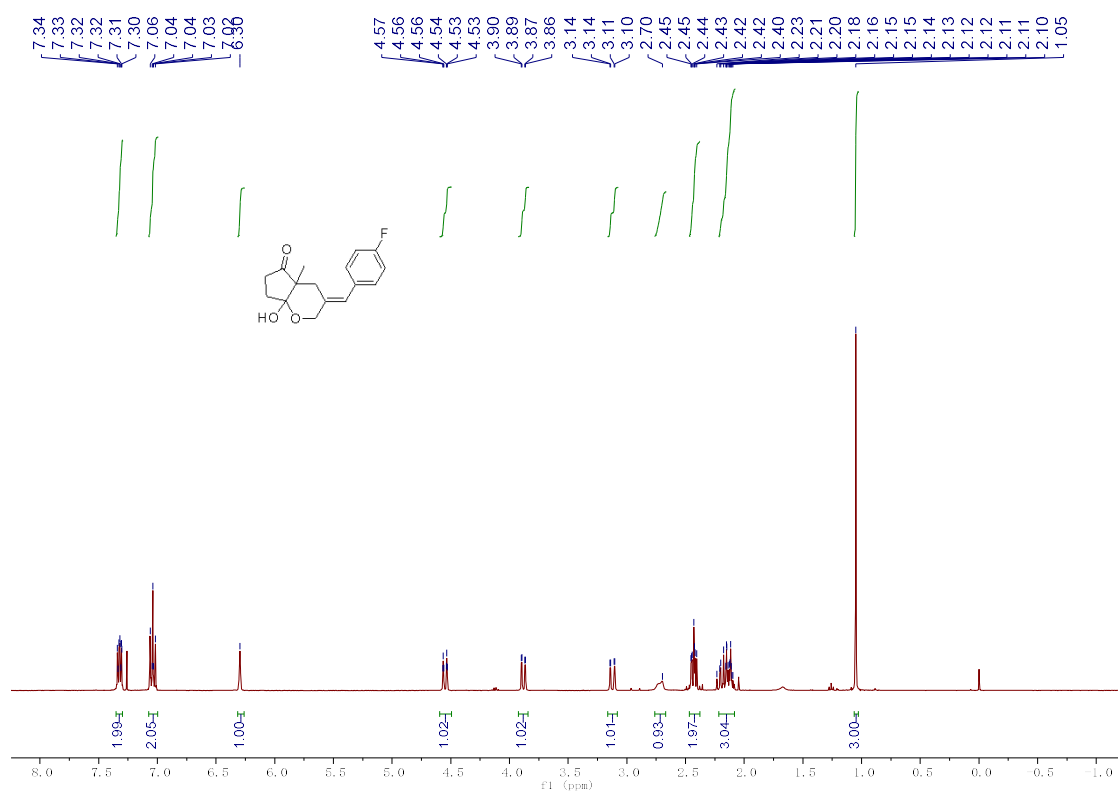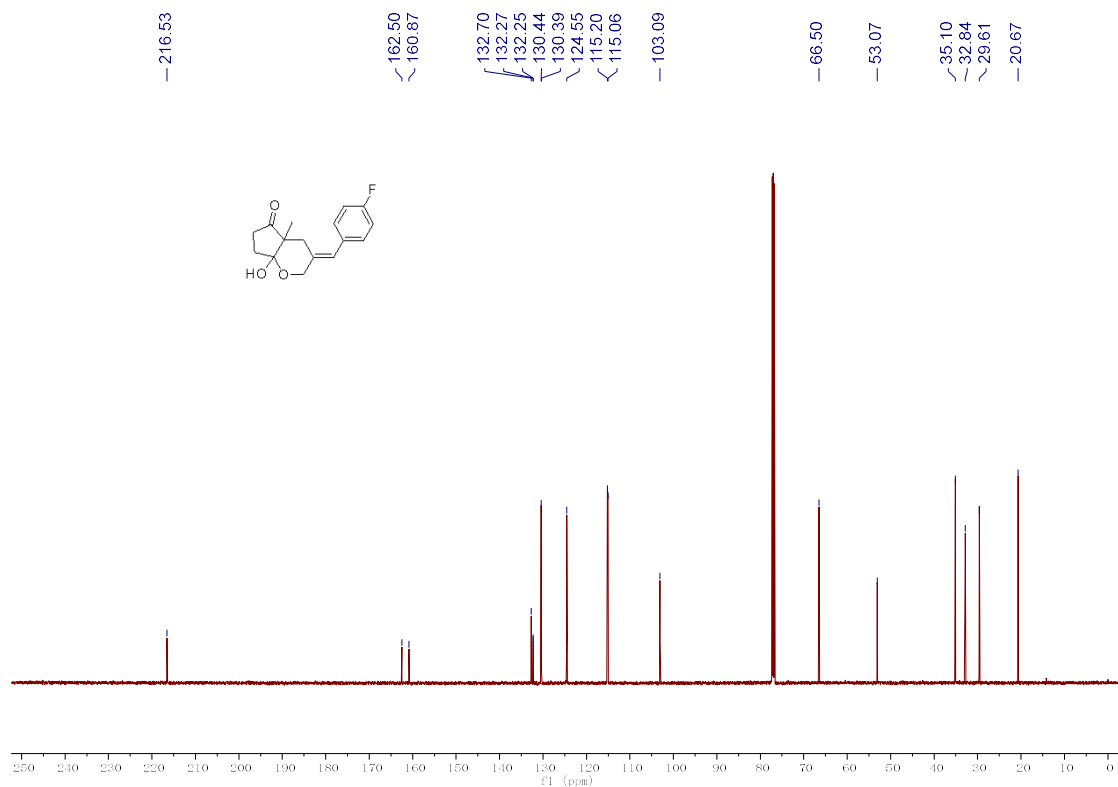

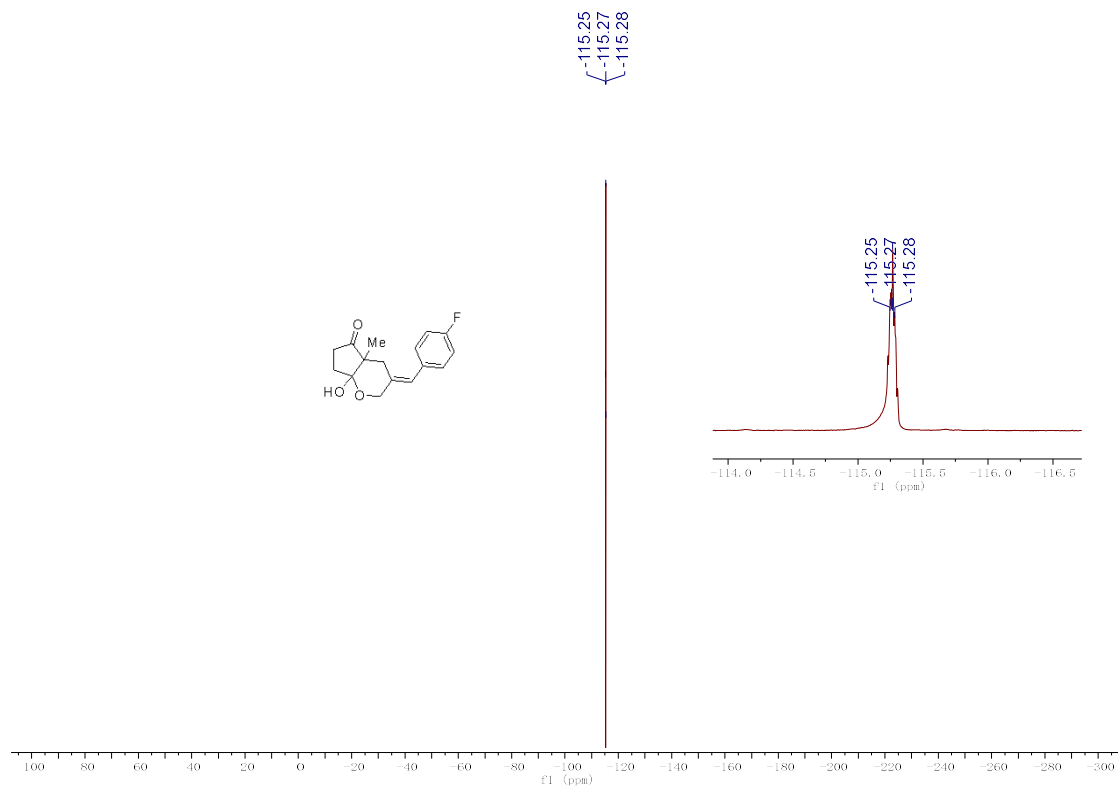



7g

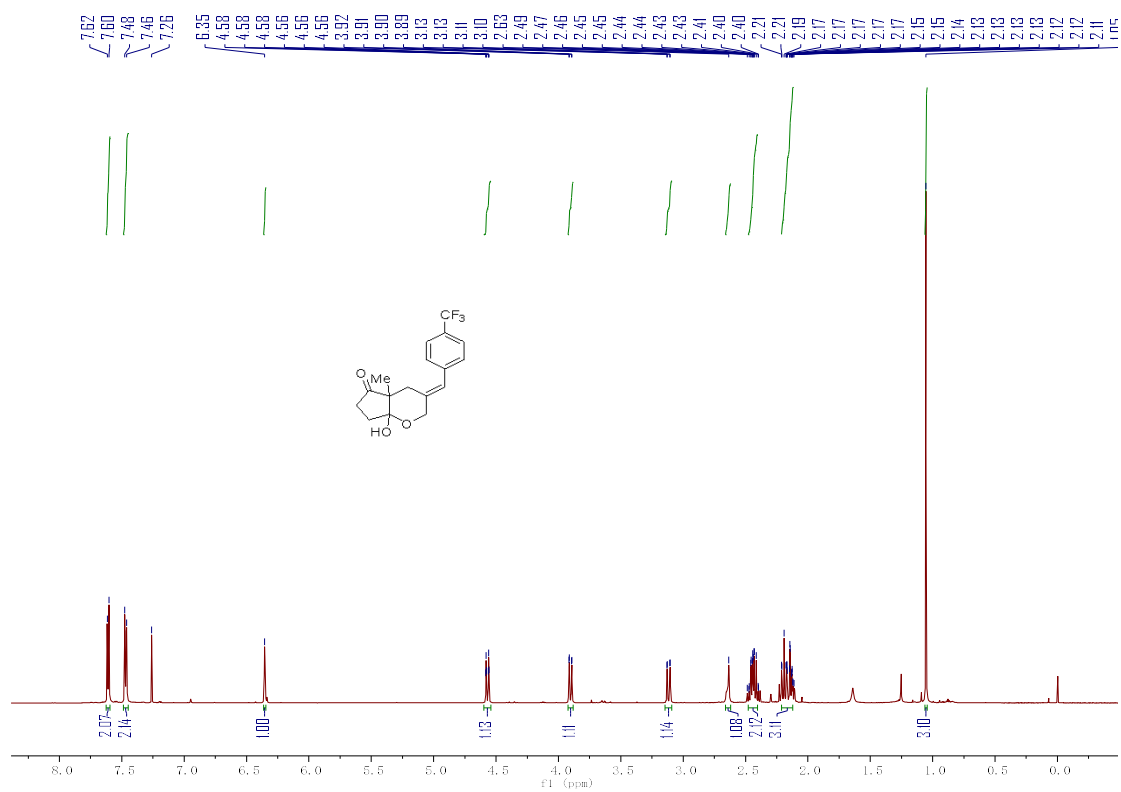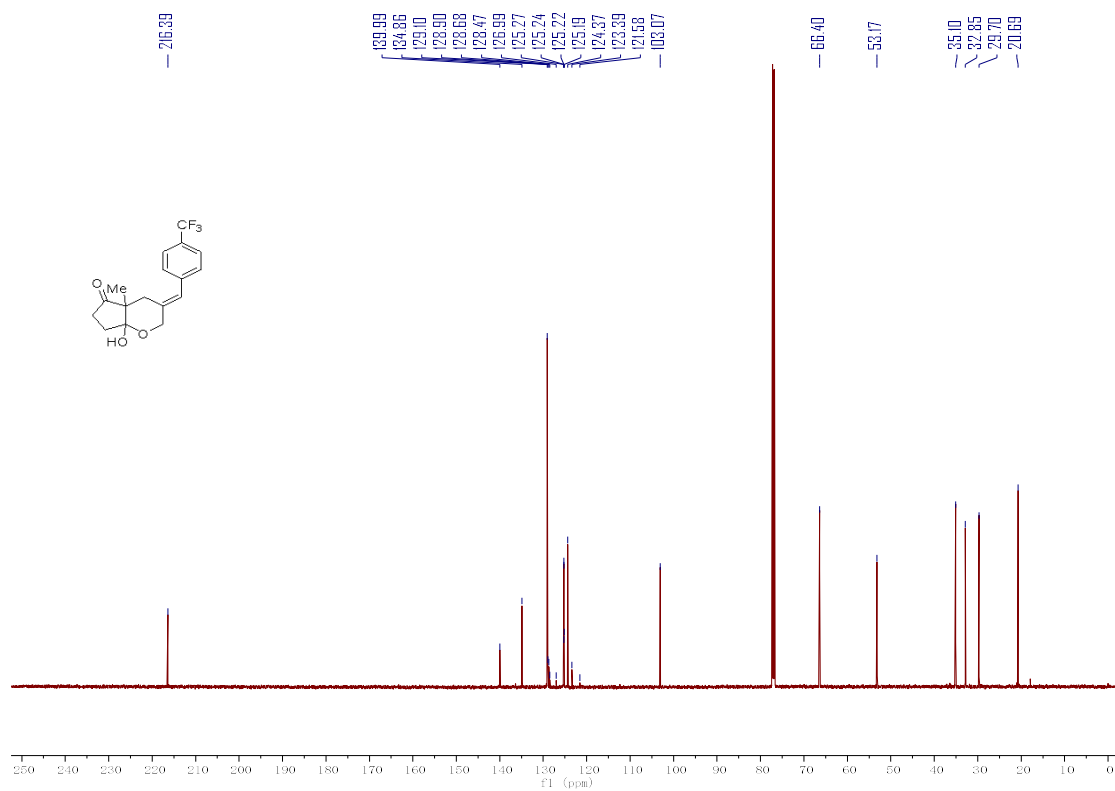

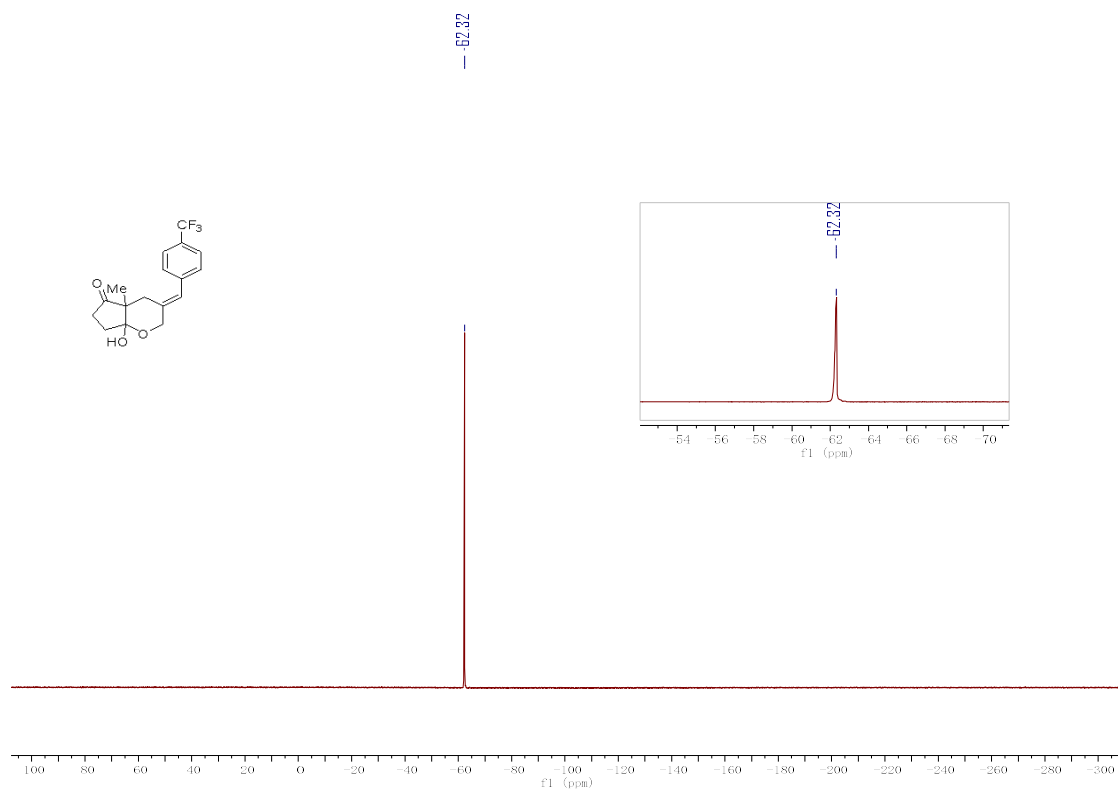

7h

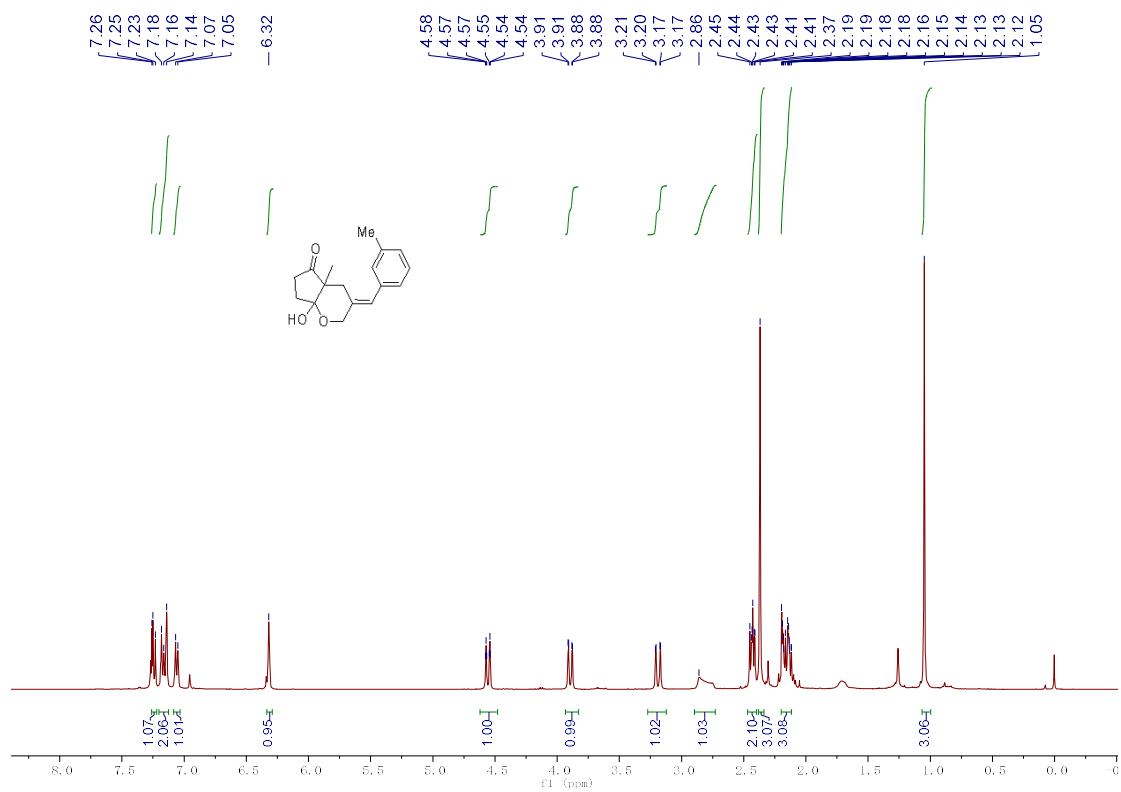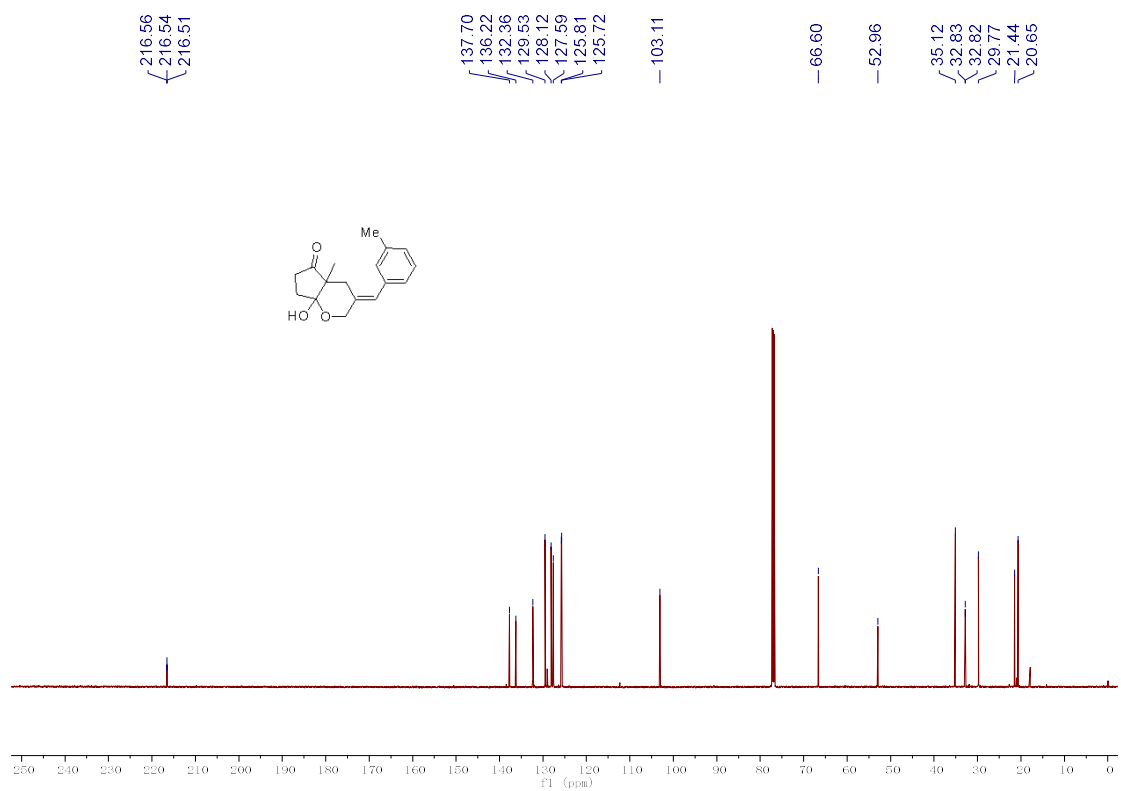

7i

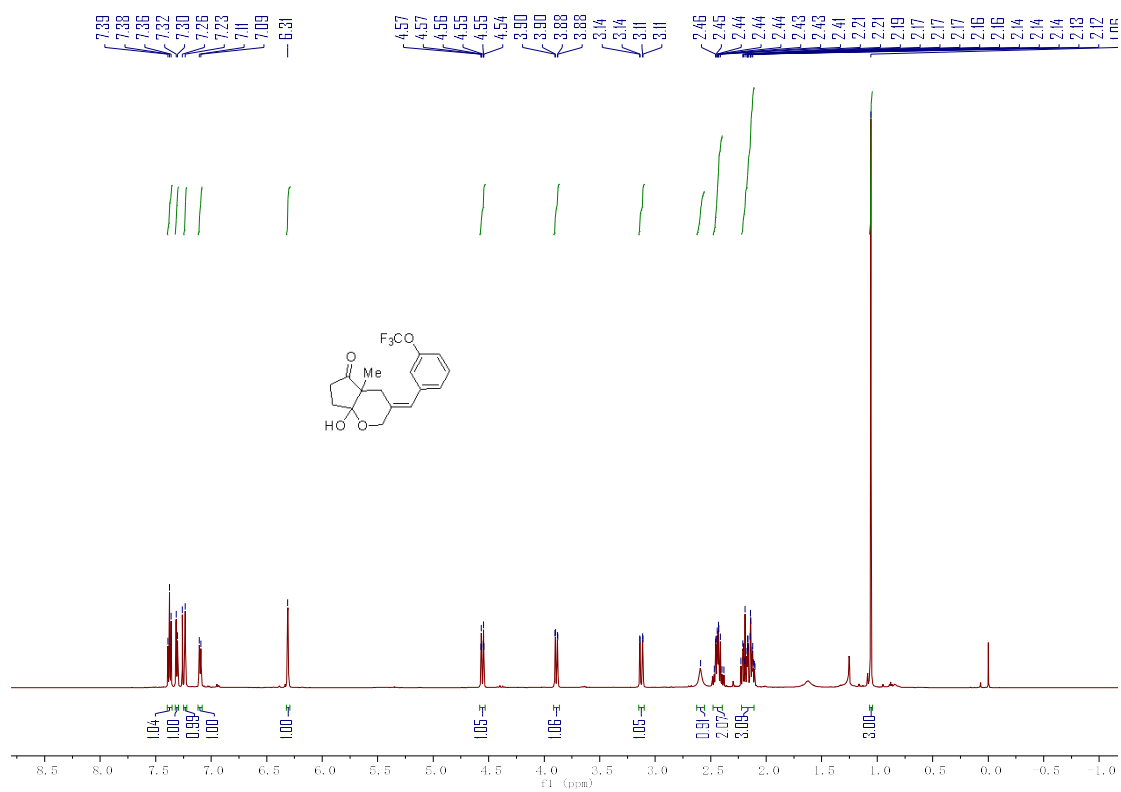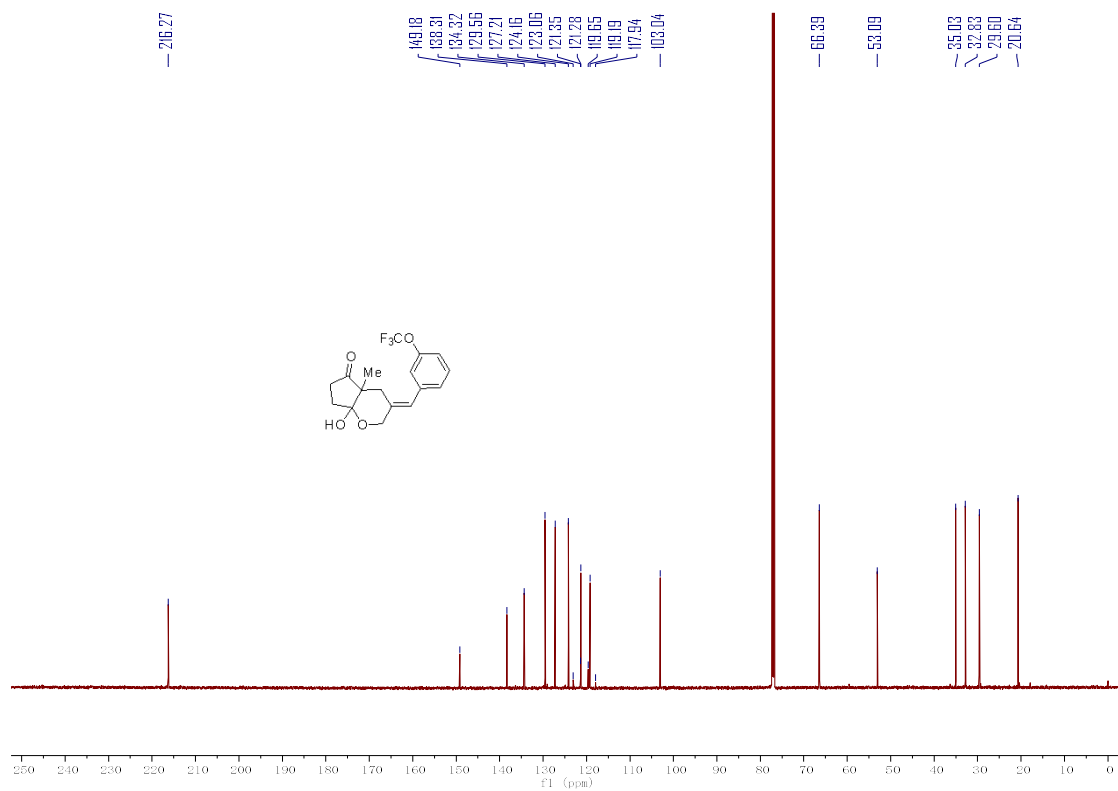

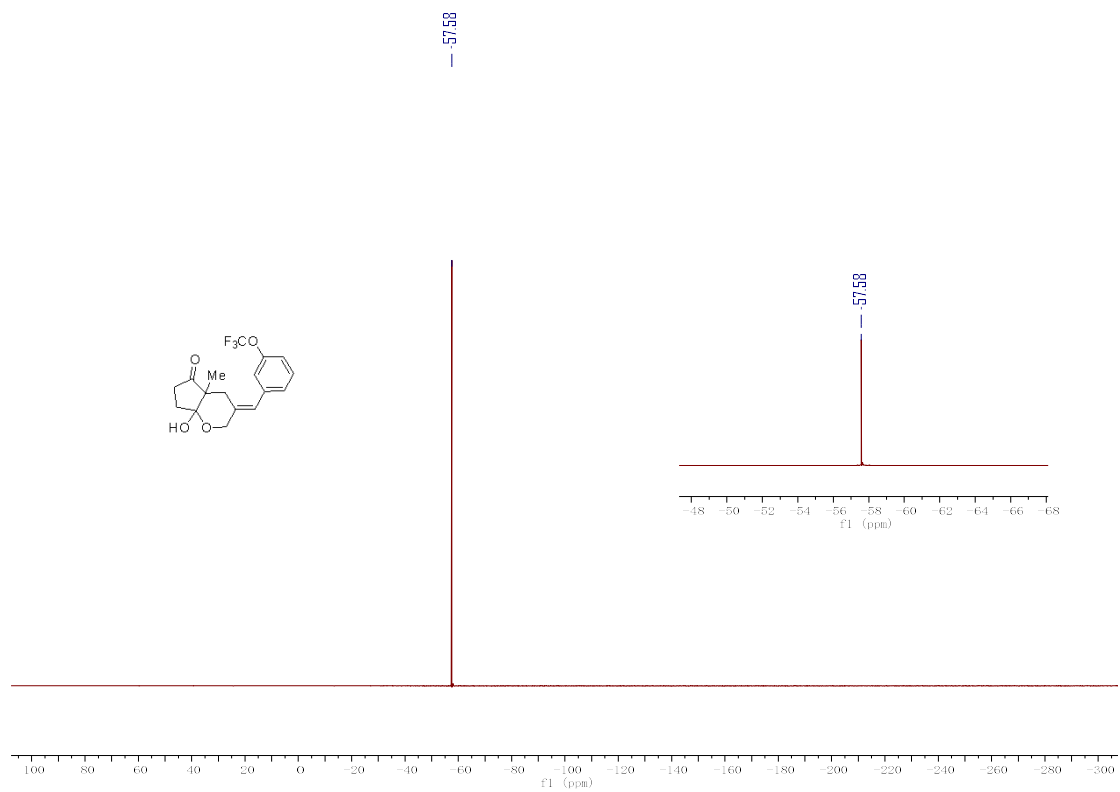

7j

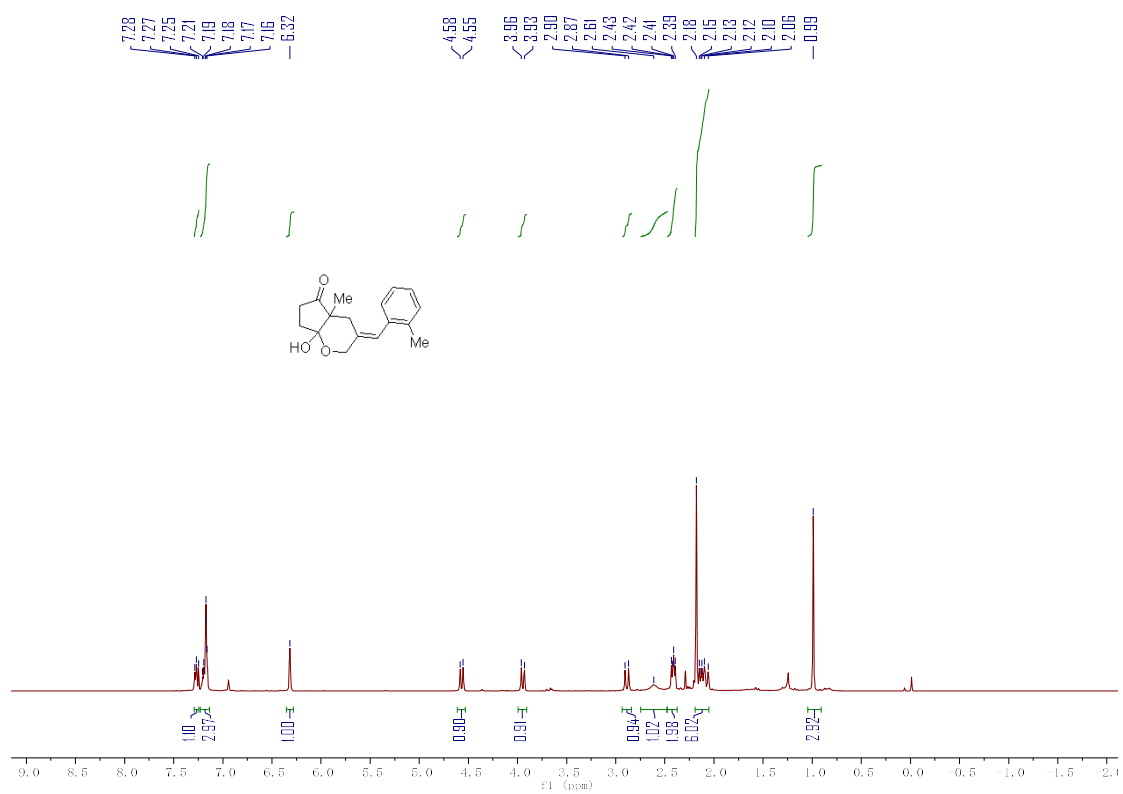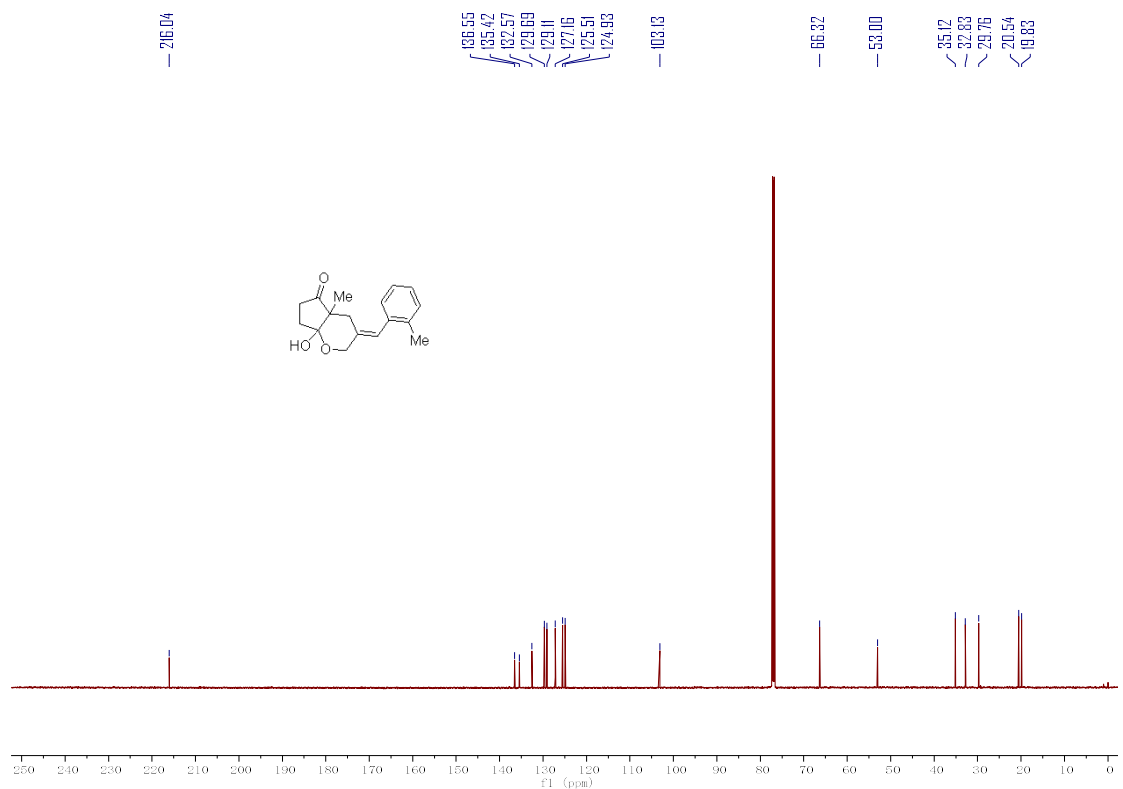

7k

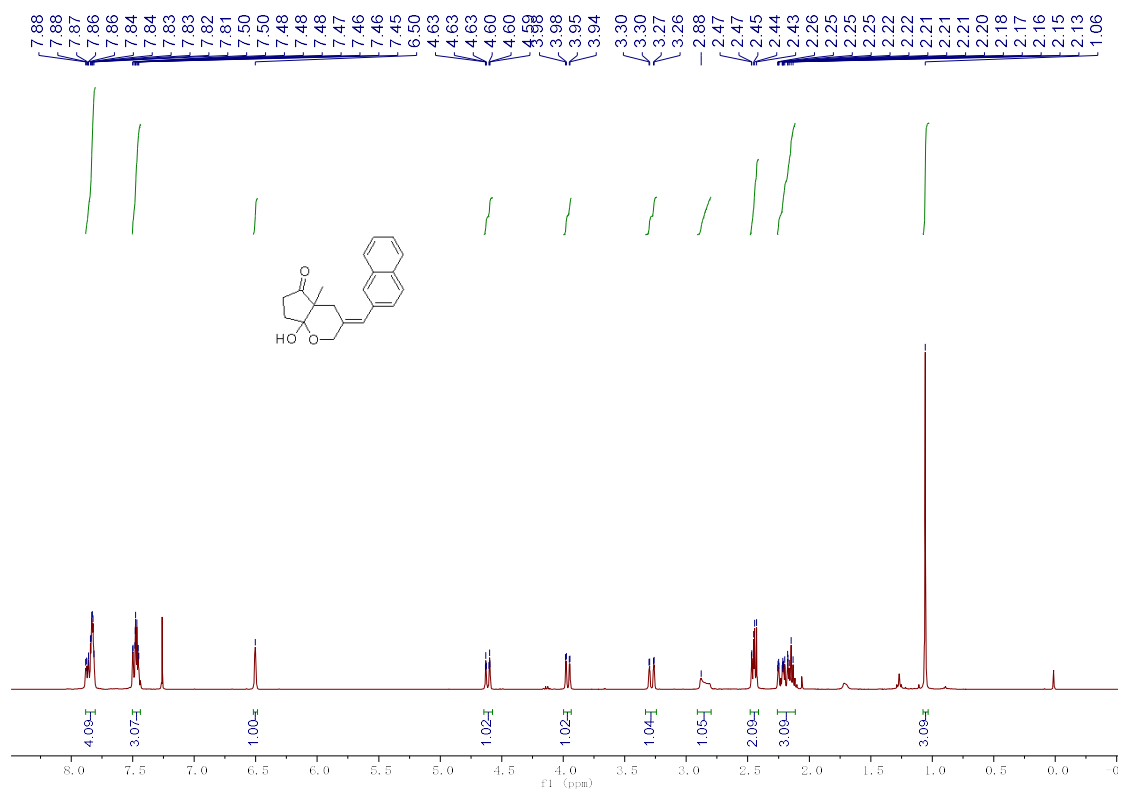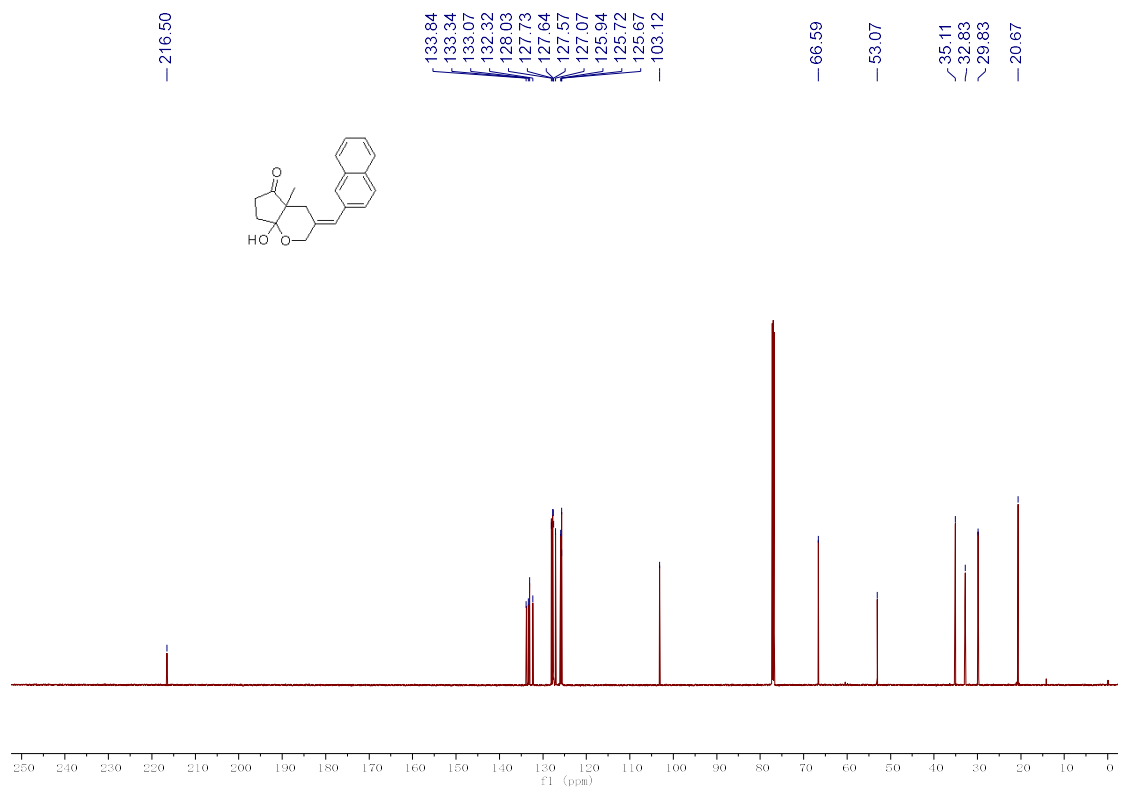

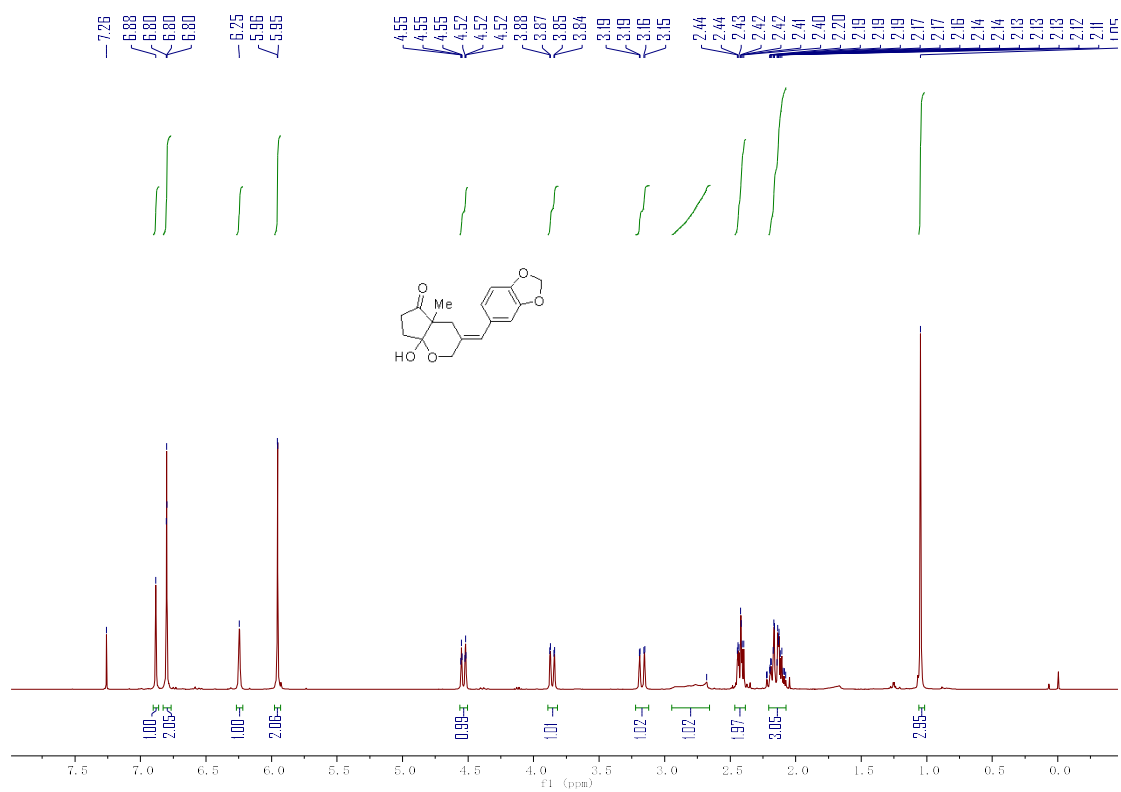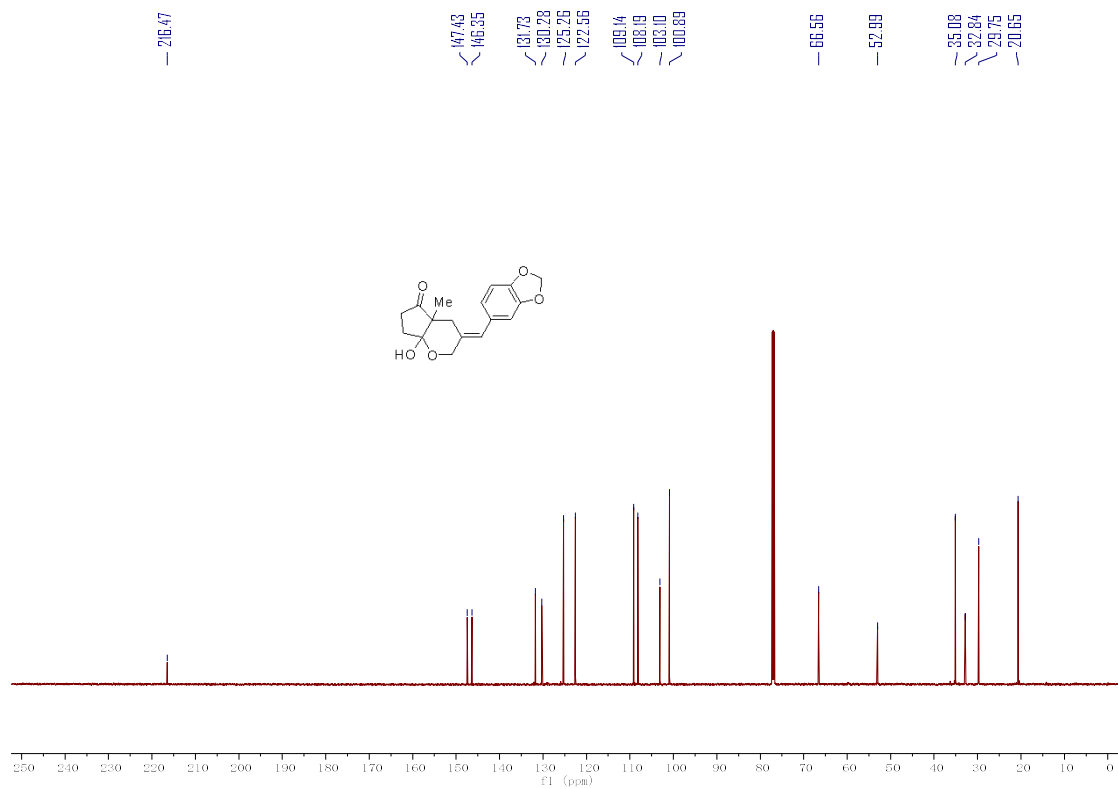



7m

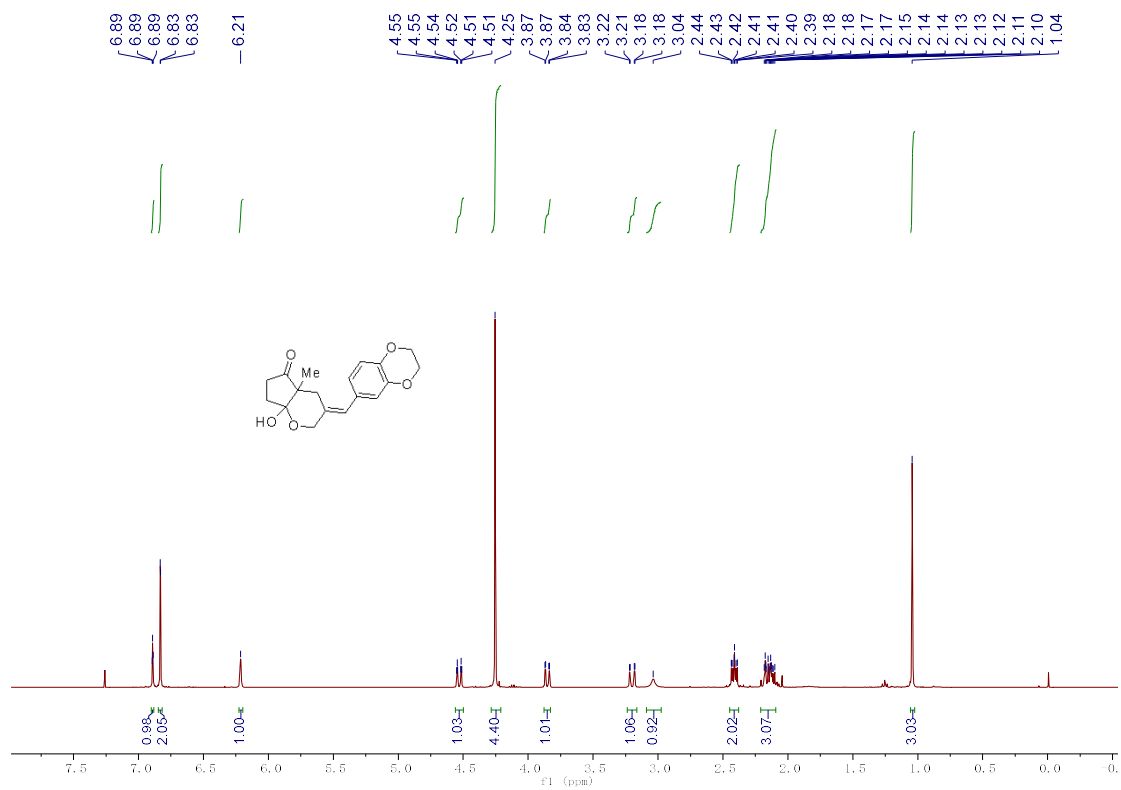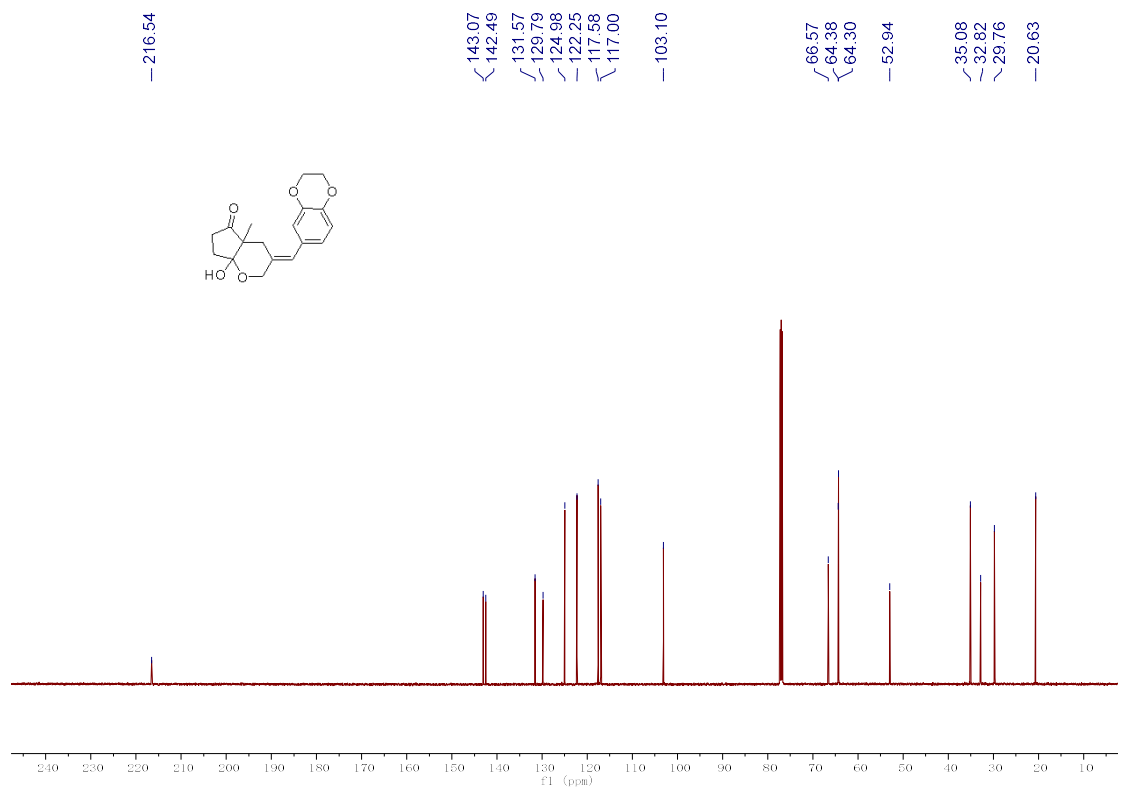

7n

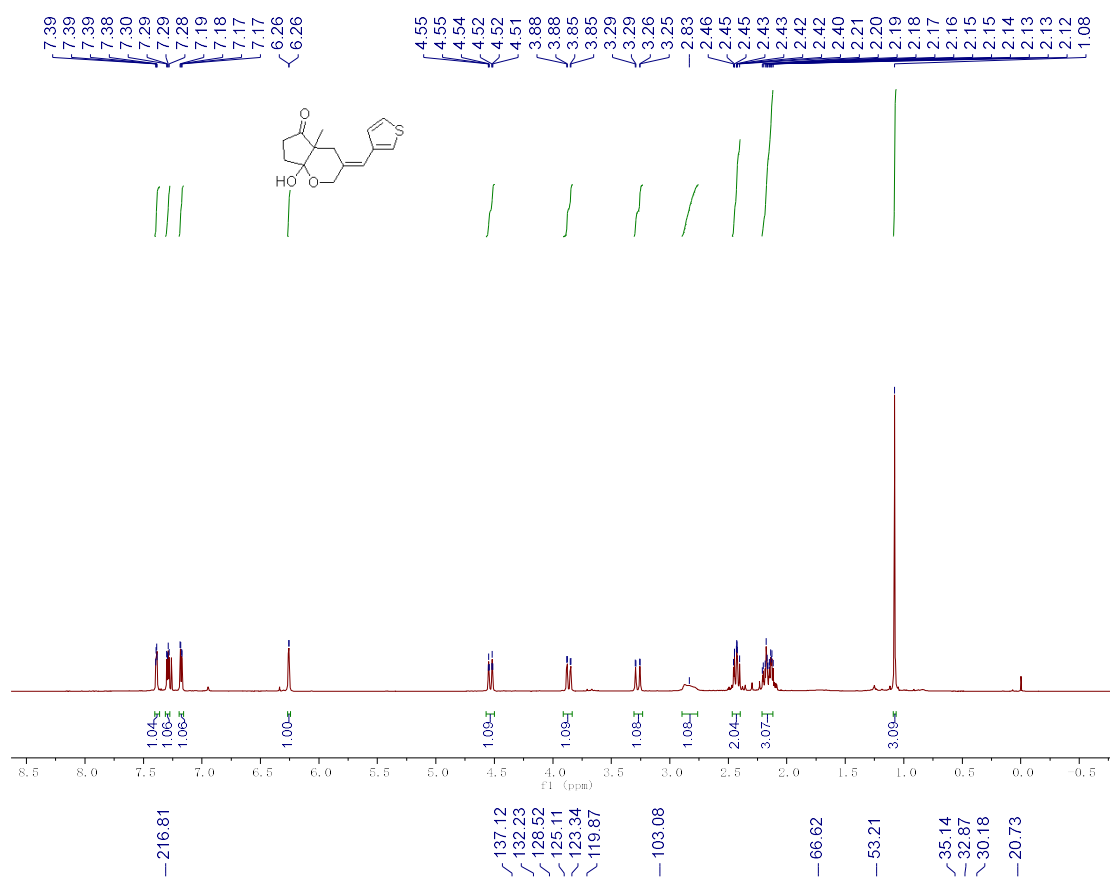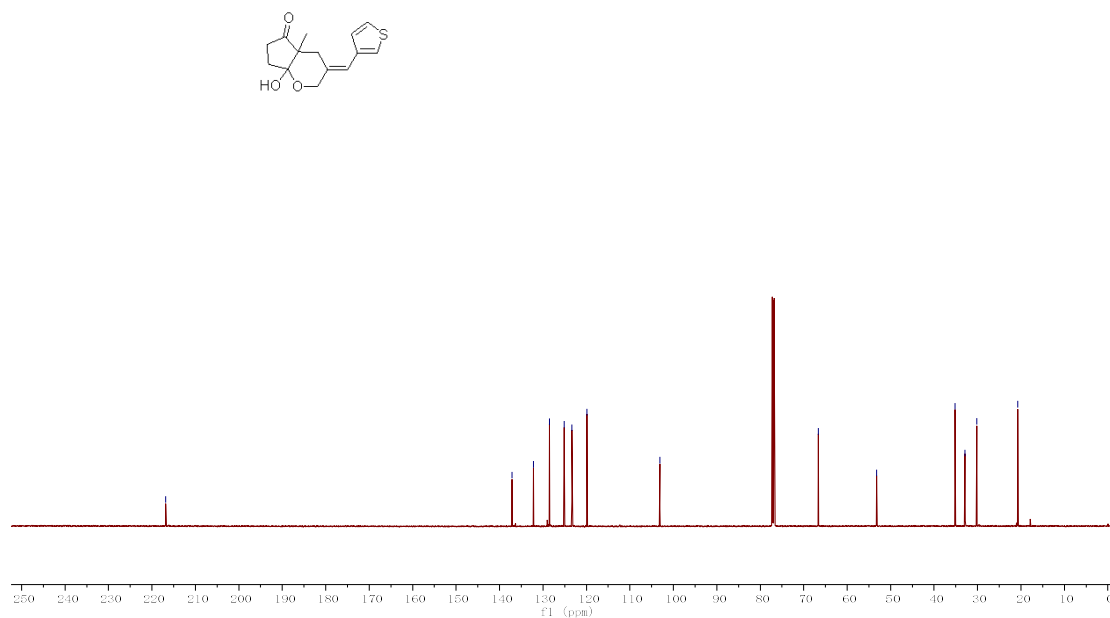

7o

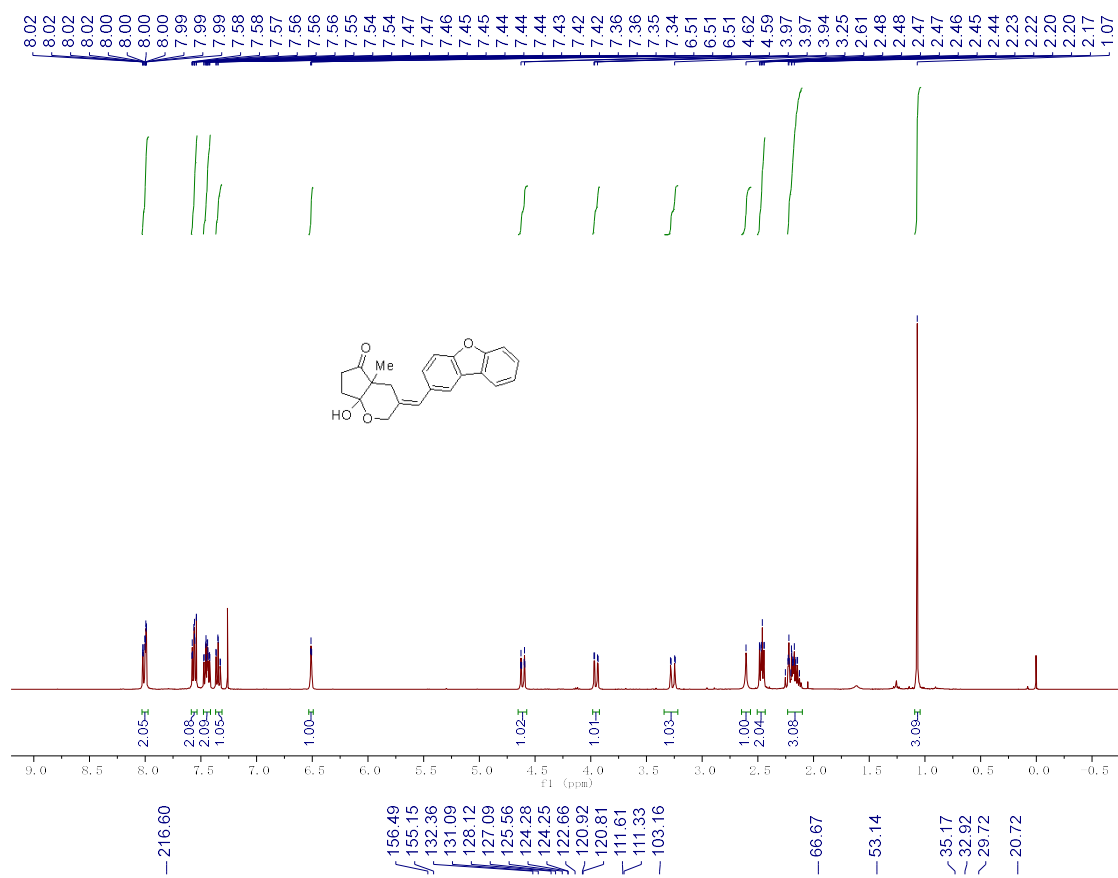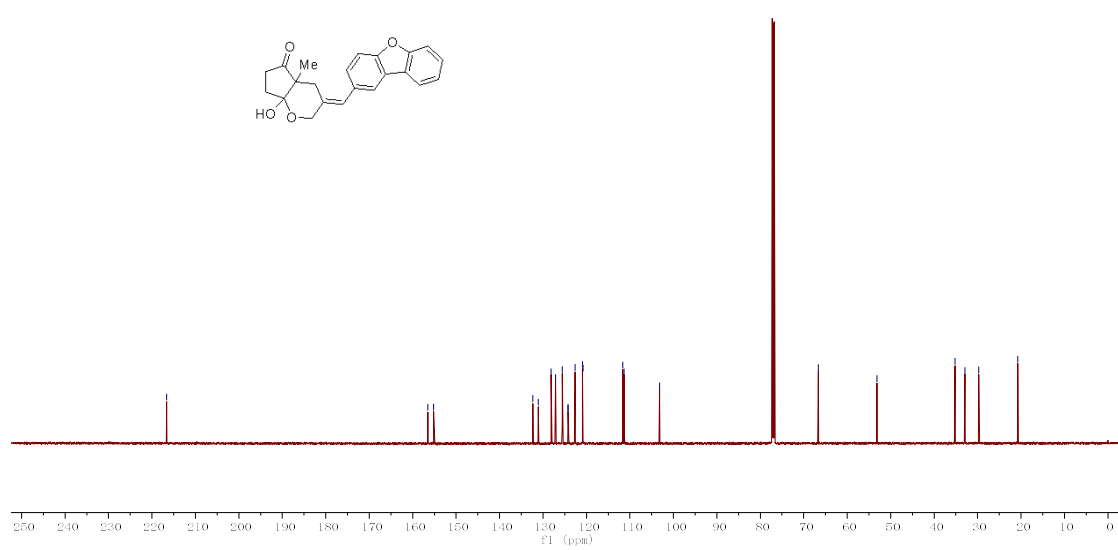

7p

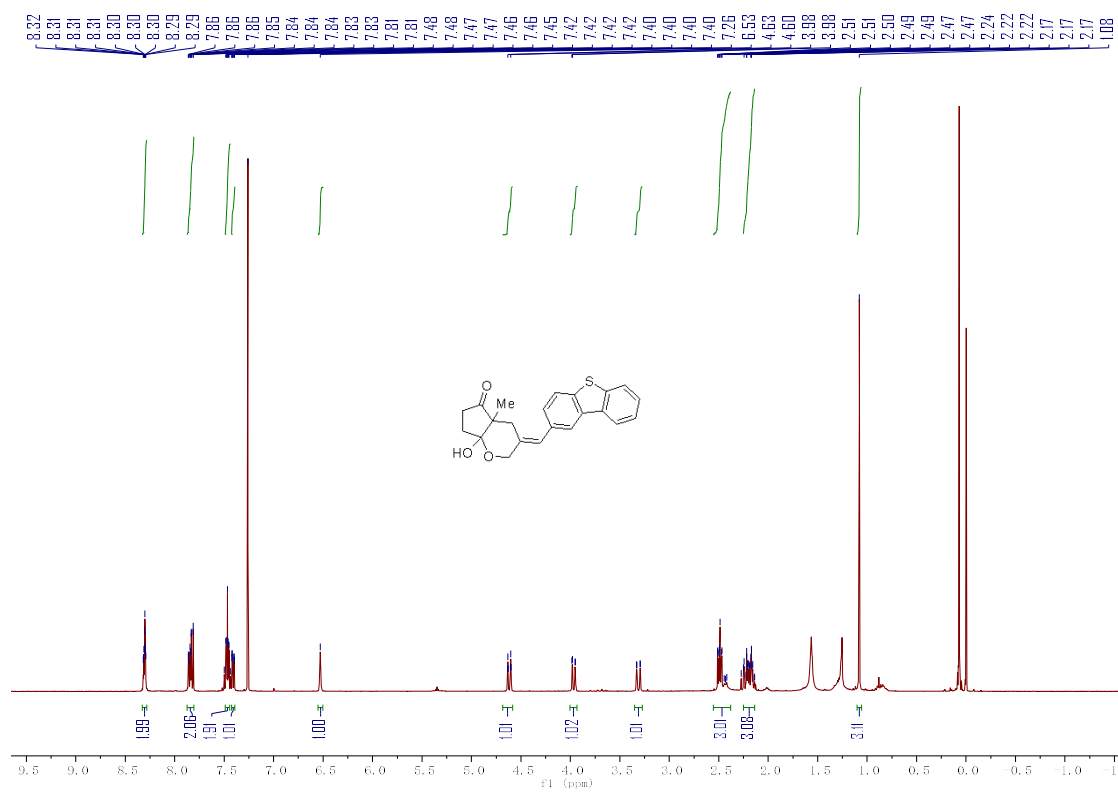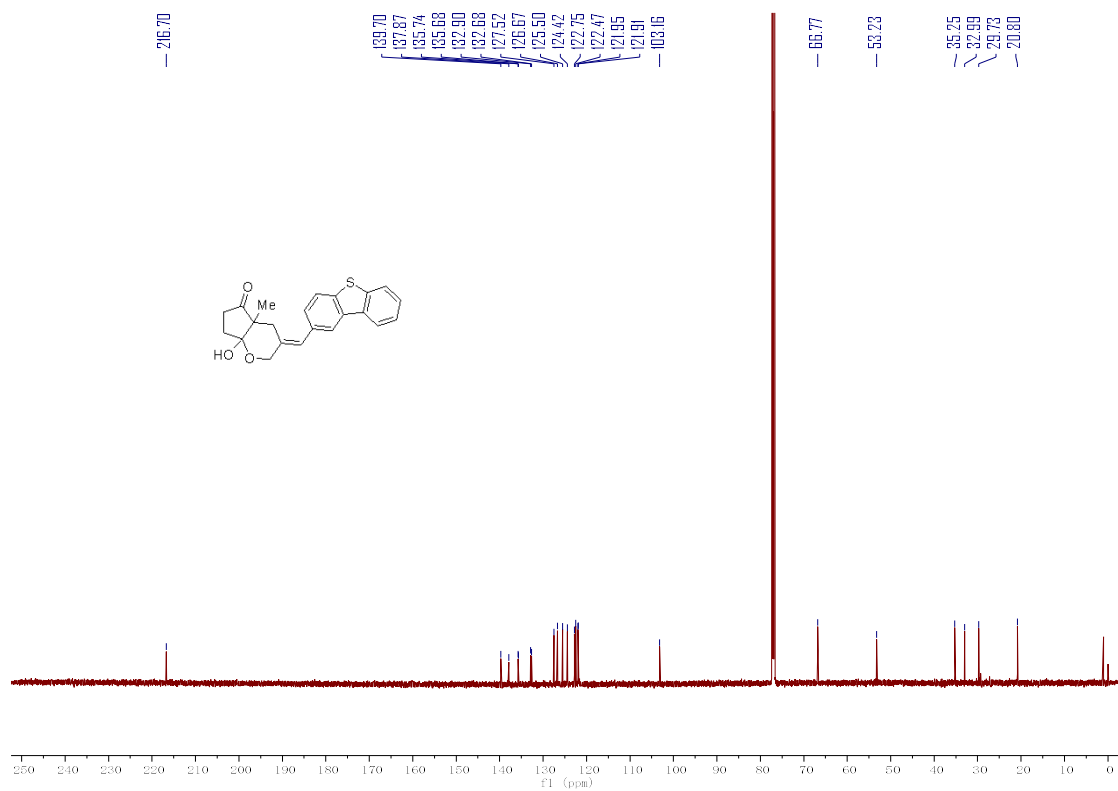

7q

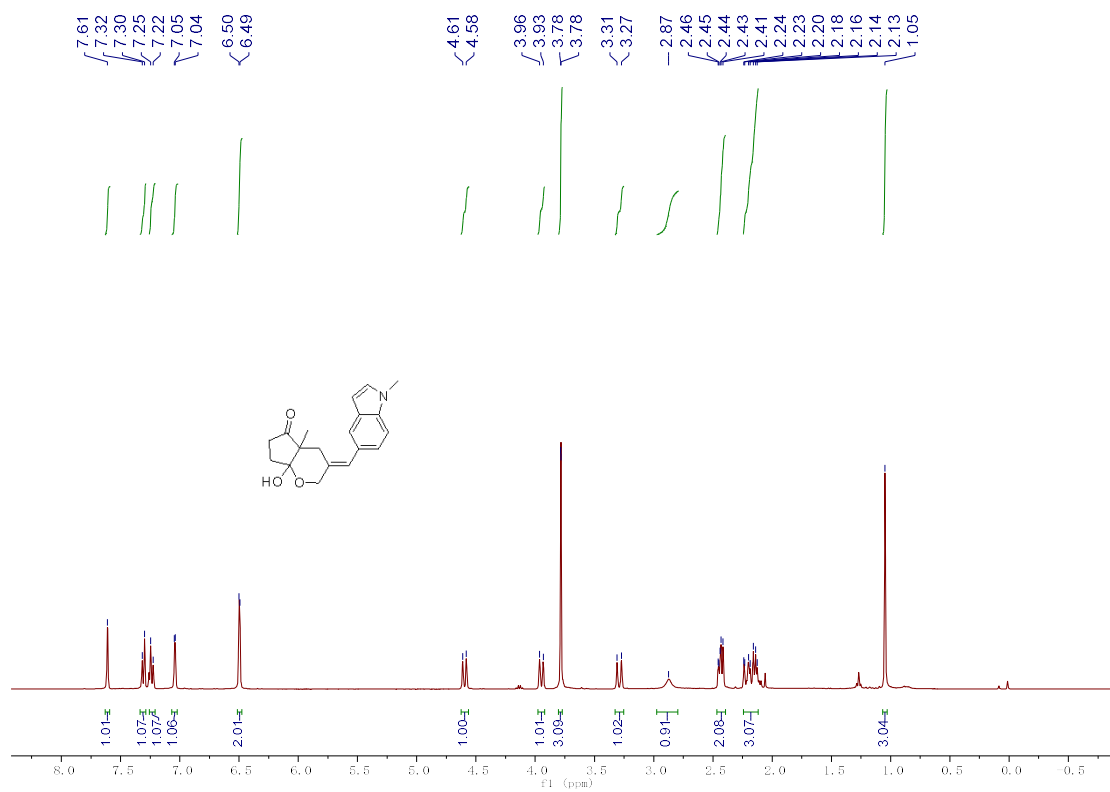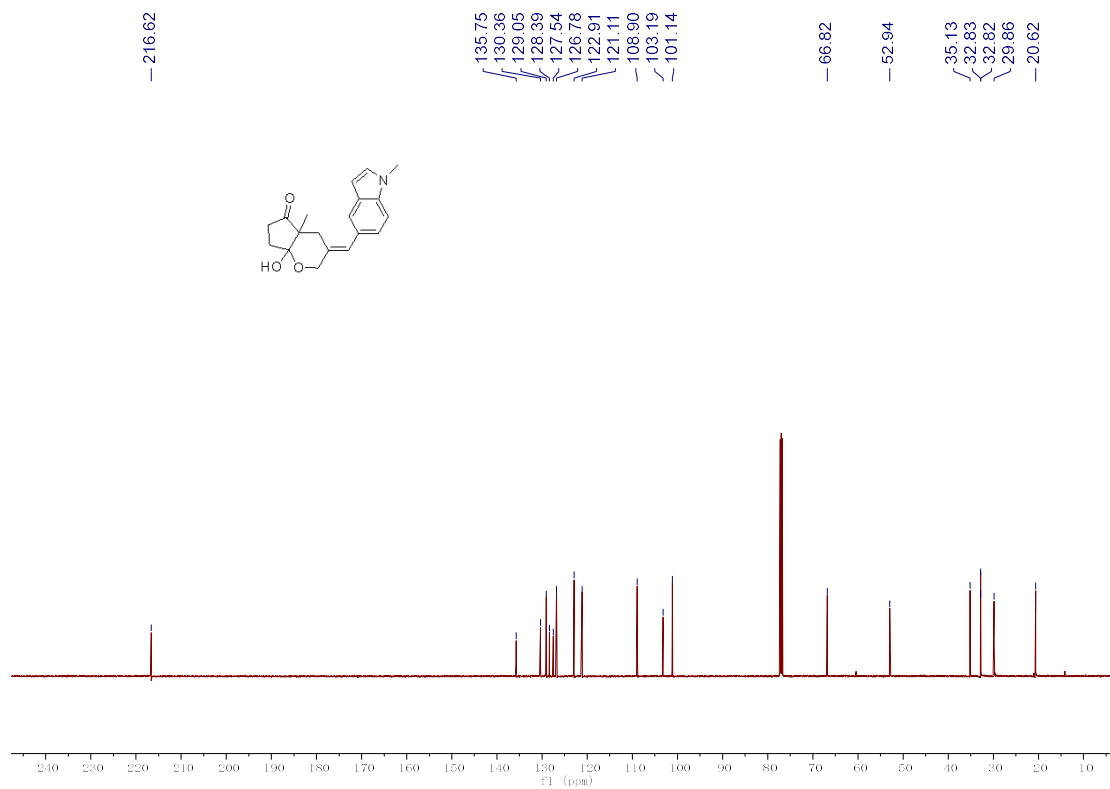

7r

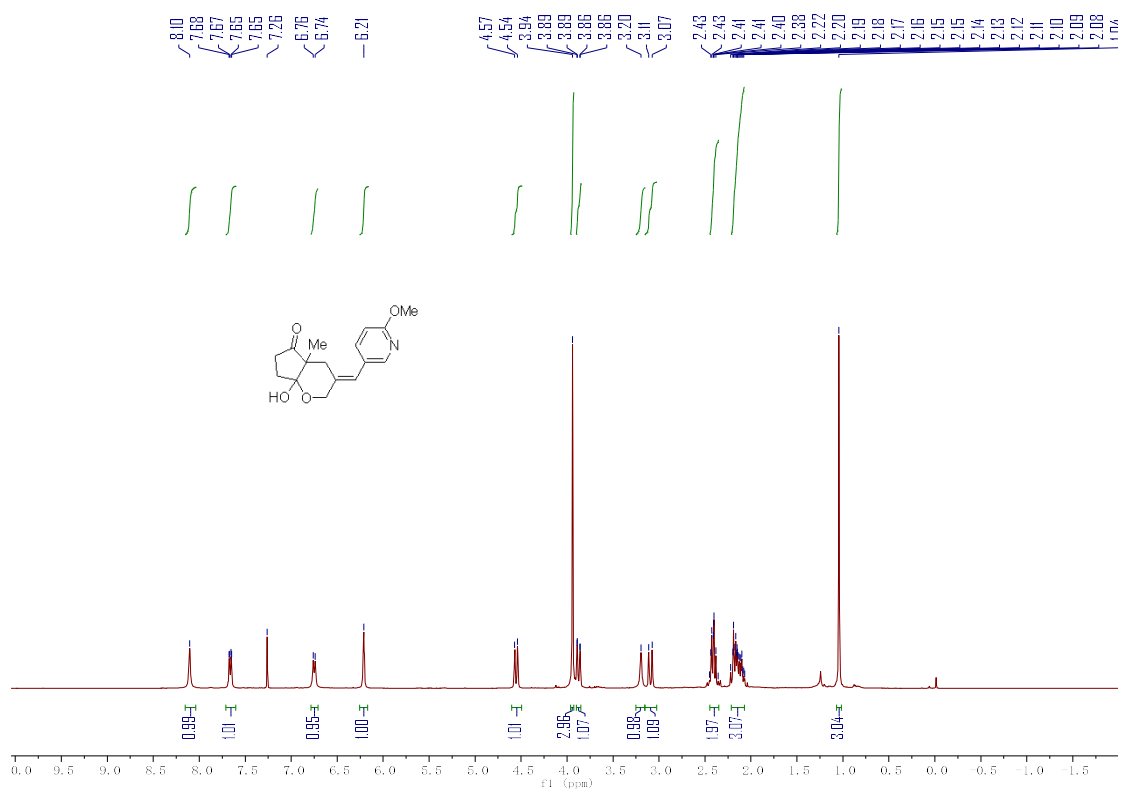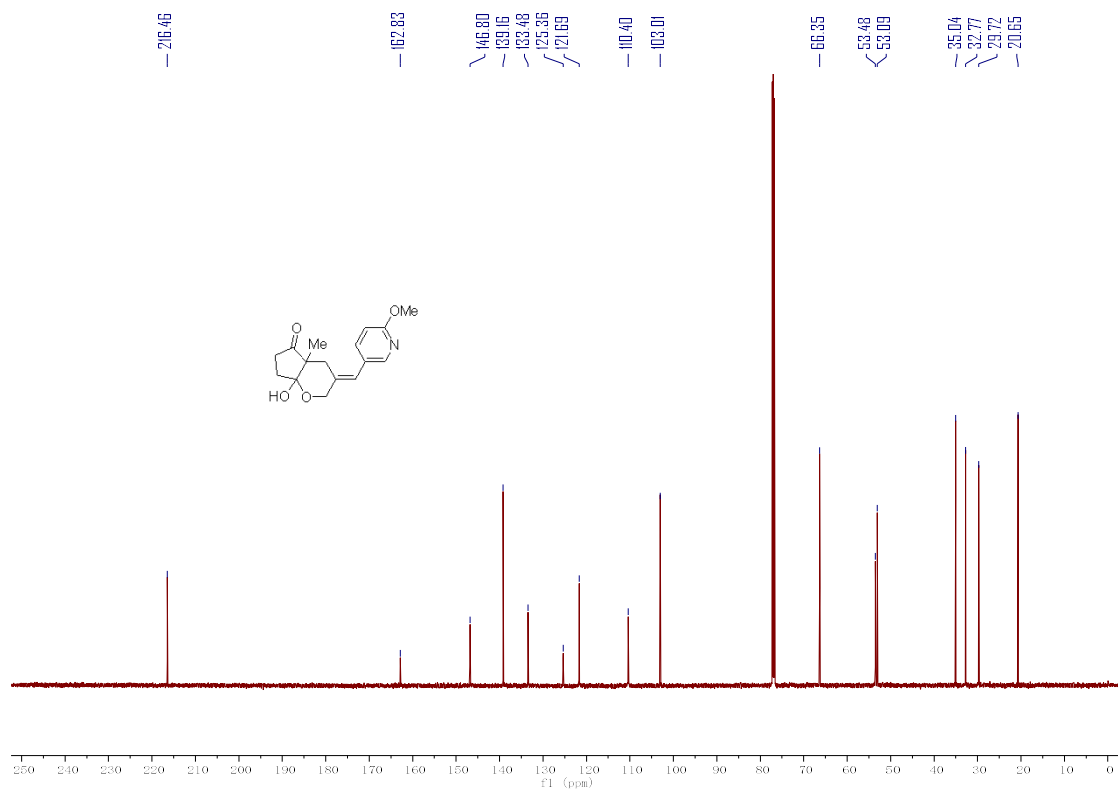

7s

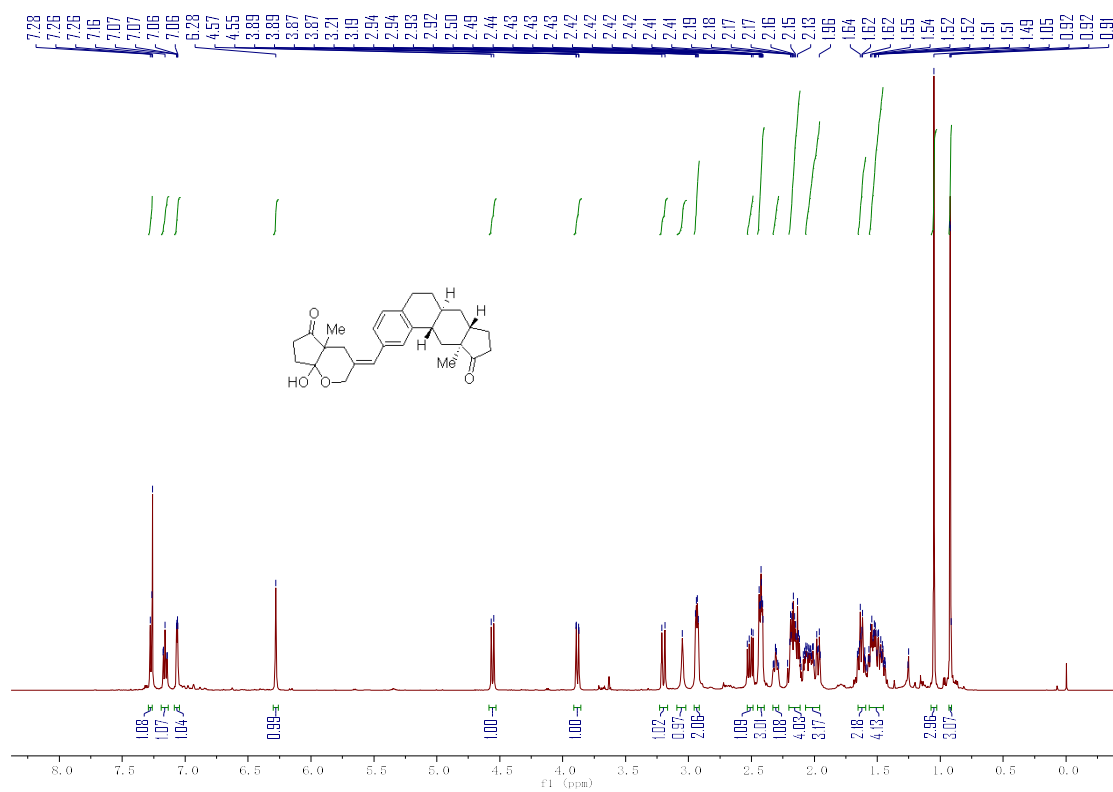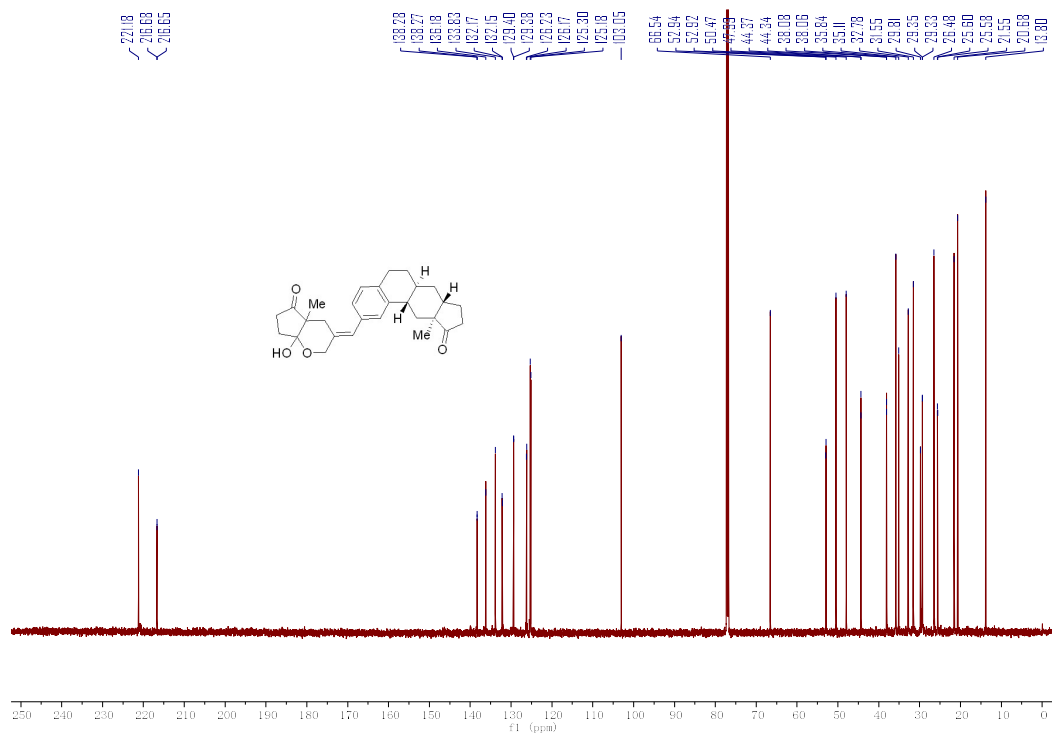

7t

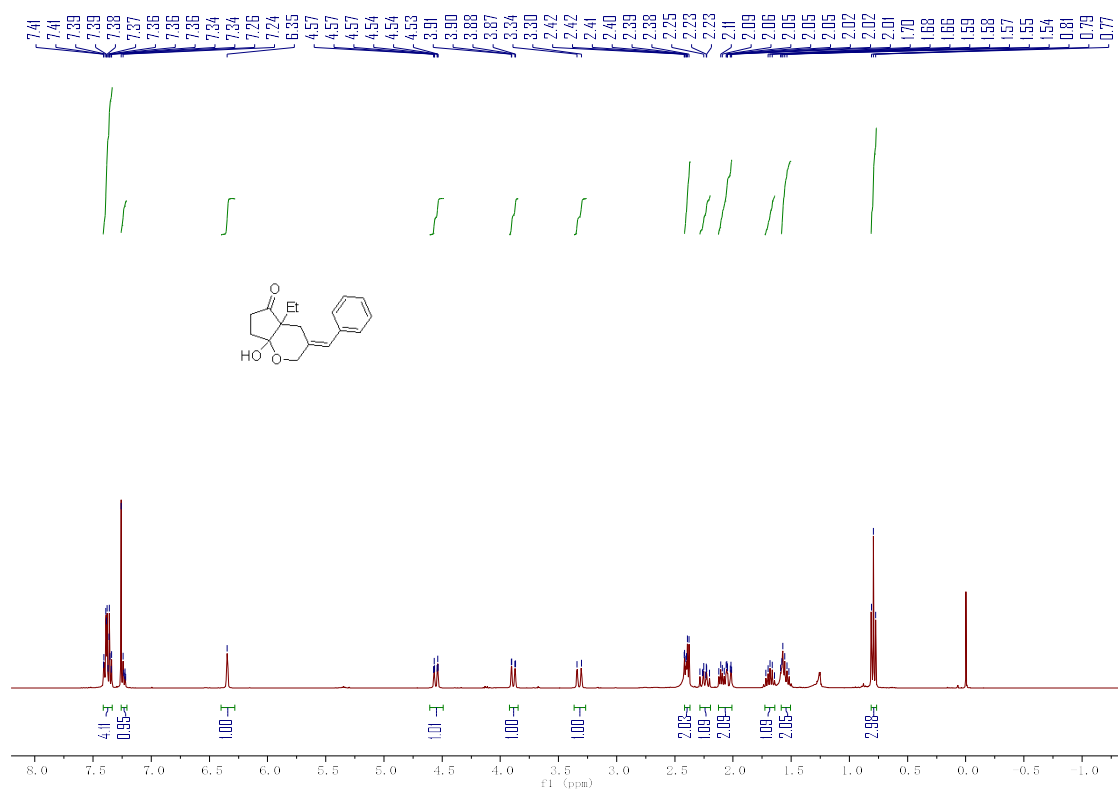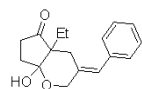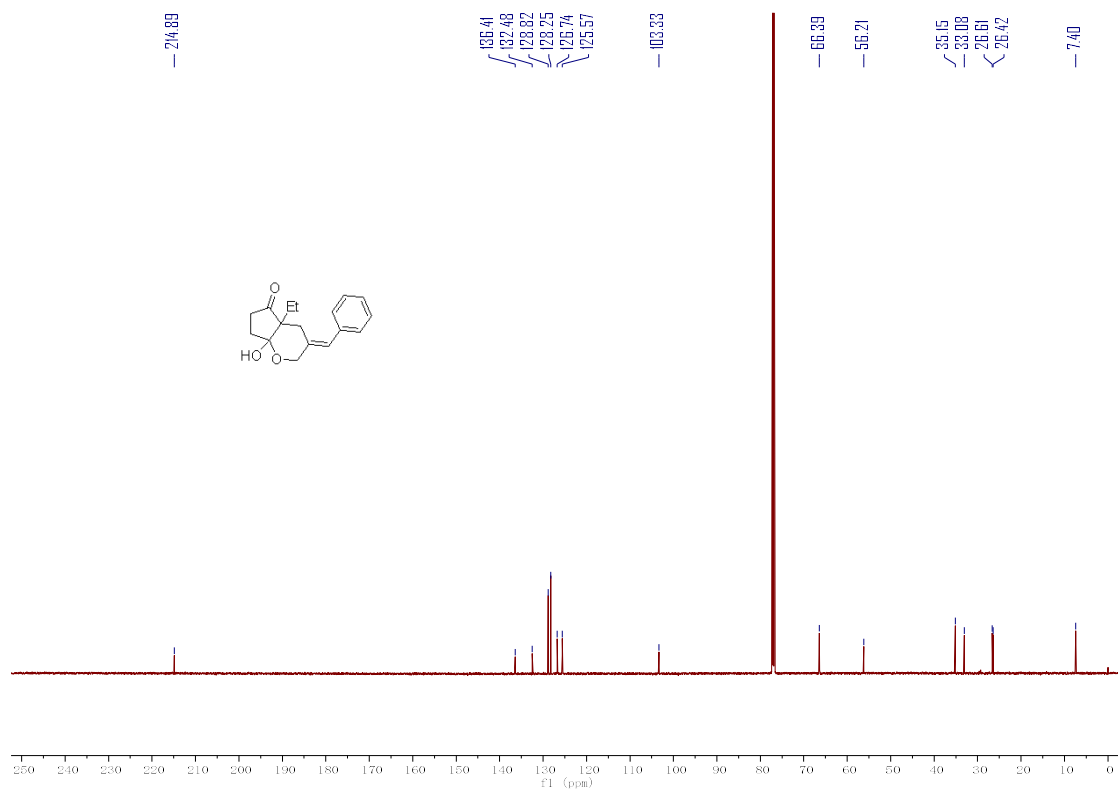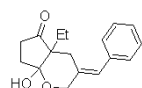



7u

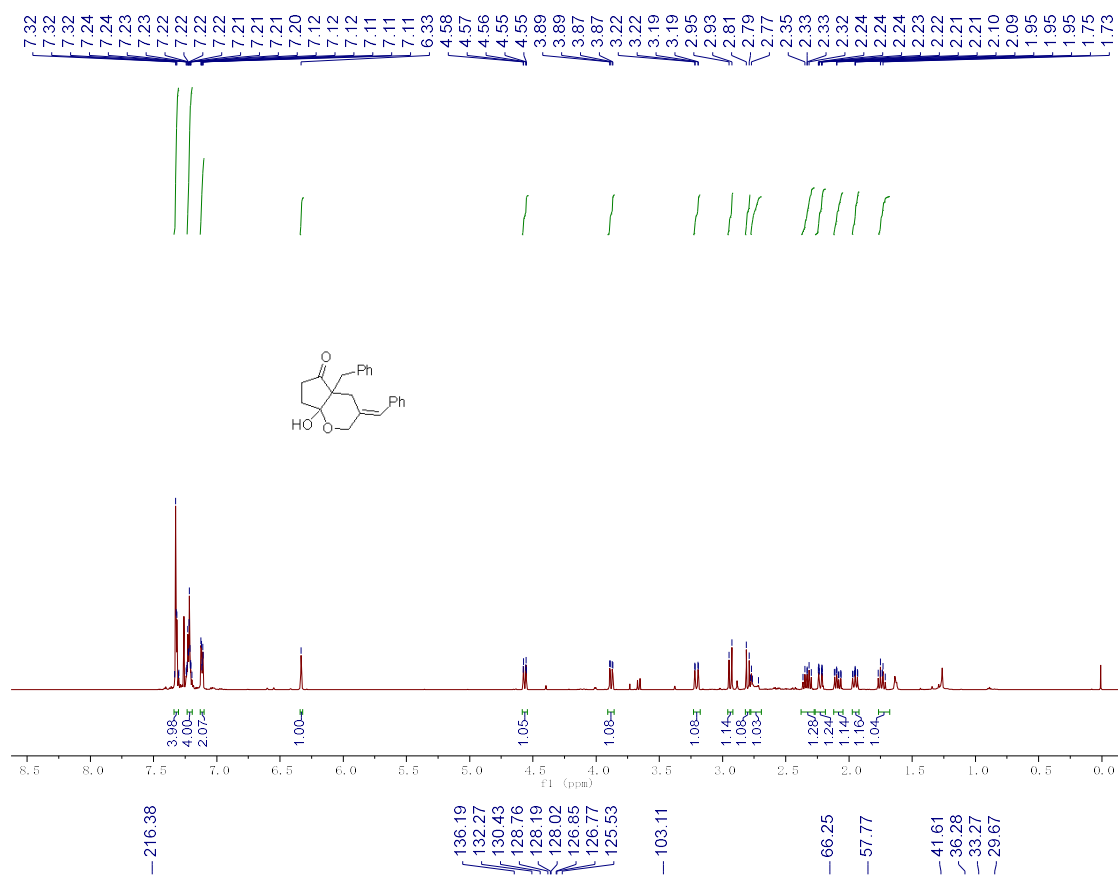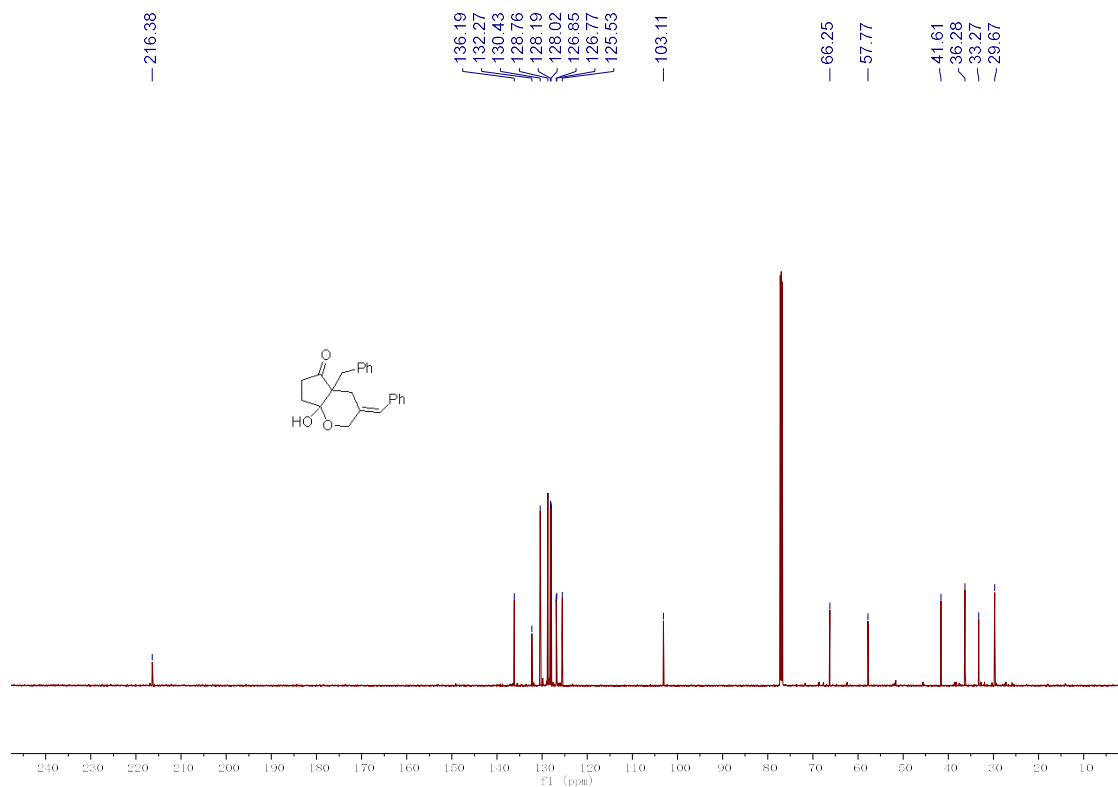

7v

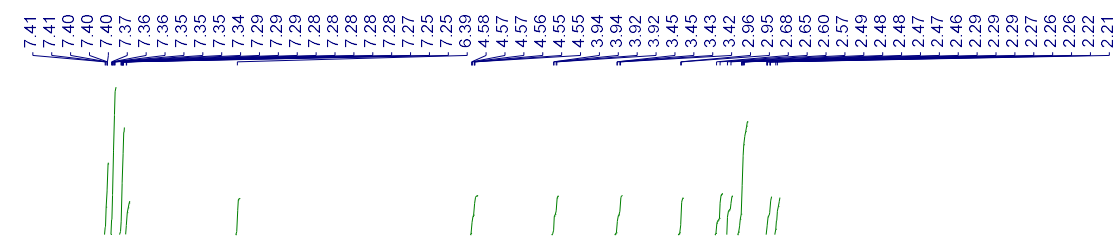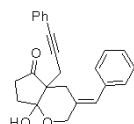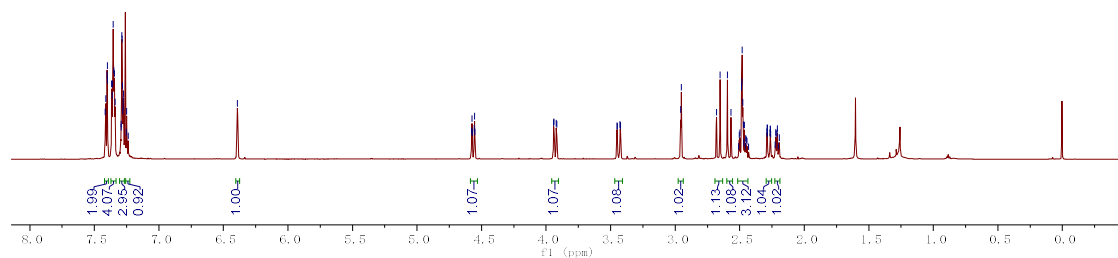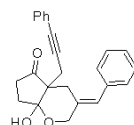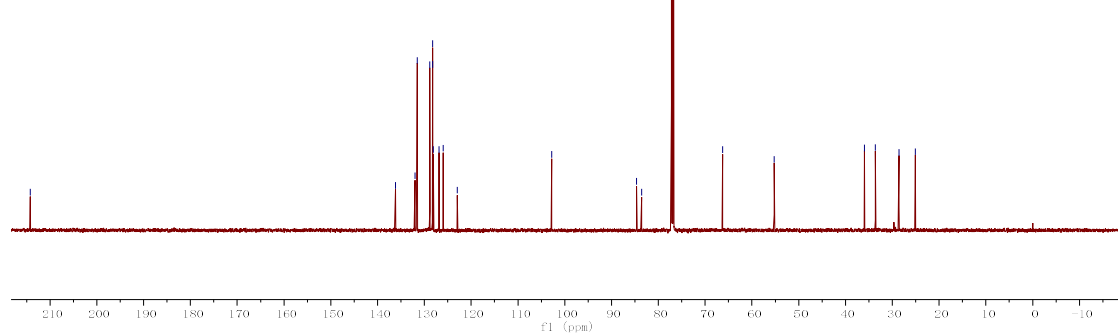

7w

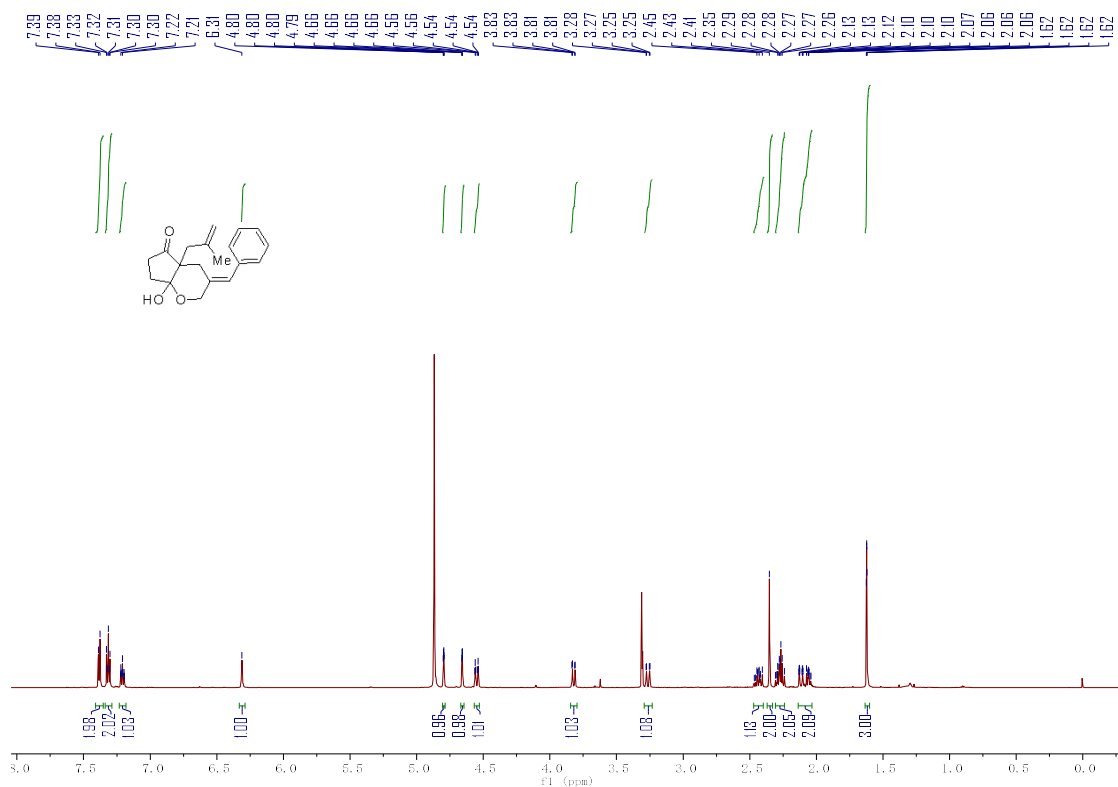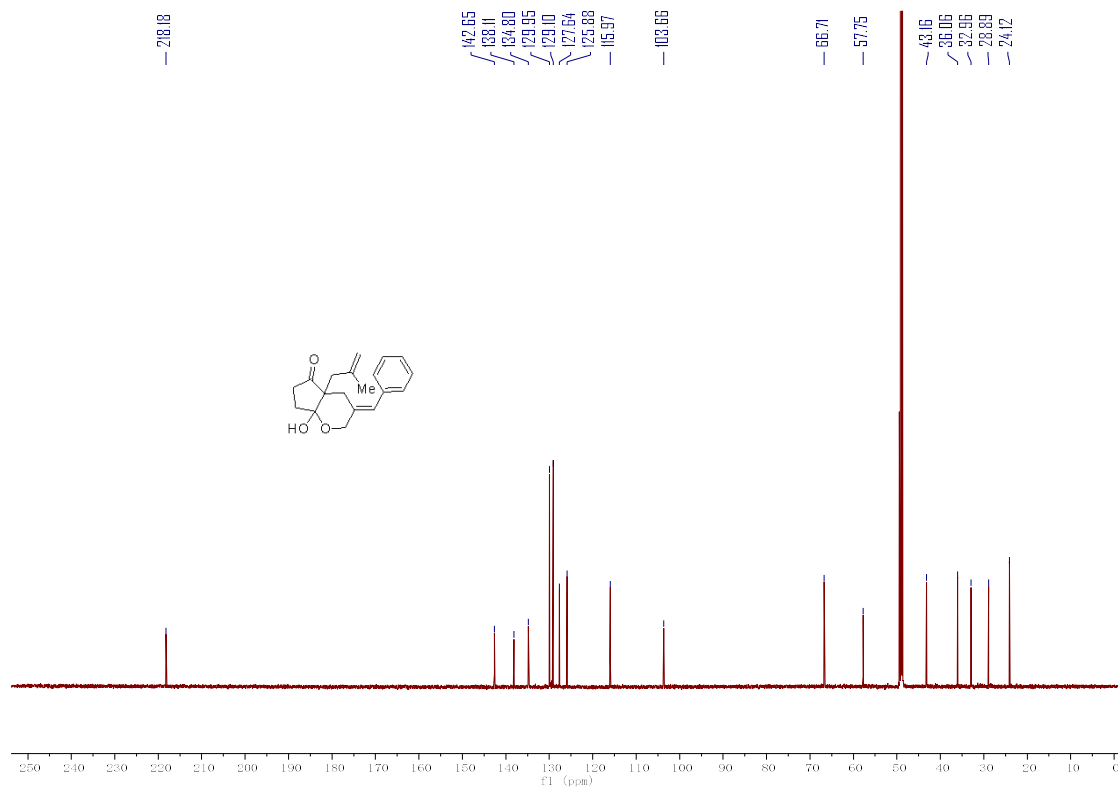

## 7. References

---

- [1] S. Ni, H. Wei, B. Li, F. Chen, Y. Liu, W. Chen, Y. Xu, X. Qiu, X. Li, Y. Lu, W. Liu, L. Hu, D. Lin, M. Wang, X. Zheng, F. Mao, J. Zhu, L. Lan and J. Li, *J. Med. Chem.* **2017**, *60*, 8145.
- [2] A. V. Malkov, L. Czemerzys and D. A. Malyshev, *J. Org. Chem.* **2009**, *74*, 3350.
- [3] R. Wang, Y. Tang, M. Xu, C. Meng and F. Li, *J. Org. Chem.* **2018**, *83*, 2274.
- [4] P. V. Ramachandran, T. E. Burghardt and M. V. R. Reddy, *Tetrahedron Let.* **2005**, *46*, 2121.
- [5] J. Deng, E. Feng, S. Ma, Y. Zhang, X. Liu, H. Li, H. Huang, J. Zhu, W. Zhu, X. Shen, L. Miao, H. Liu, H. Jiang and J. Li, *J. Med. Chem.* **2011**, *54*, 4508.
- [6] W. Lölsberg, S. Y. Hans and G. Schmalz, *Adv. Synth. Catal.* **2010**, *352*, 2023.
- [7] M. H. Babu, G. R. Kumar, R. Kantc and M. S. Reddy, *Chem. Commun.* **2017**, *53*, 3894.
- [8] T. Fujihara, T. H. Xu, K. Semba, J. Terao and Y. Tsuji, *Angew. Chem. Int. Ed.* **2011**, *50*, 523.
- [9] F. Habib and A. G. B. Reza, *Chem. Soc. Jpn.* **1995**, *68*, 2595-2602.
- [10] M. R. Unroe and B. A. Reinhardt, *Synthesis* **1987**, *11*, 981.
- [11] M. Kitamura, Y. Hirokawa and N. Maezaki, *Chem. Eur. J.* **2009**, *15*, 9911.
- [12] B. N. Hemric, A. W. Chen and Q. Wang, *ACS Catal.* **2019**, *9*, 10070.
